# Supplementary material
Source: PubMed Central journal article supplement (PMC10508391)
Supplement: NIHMS1922472-supplement-jm-2021-01214x_SI_1.pdf [file NIHMS1922472-supplement-jm-2021-01214x_SI_1.pdf]

## Supporting Information

# Indole Chloropyridinyl Ester-Derived SARS-CoV-2 3CLpro Inhibitors: Enzyme Inhibition, Antiviral Efficacy, Structure-Activity and X-ray Structural Studies

*Arun K. Ghosh,<sup>\*,†</sup> Jakka Raghavaiah,<sup>†</sup> Dana Shahabi,<sup>†</sup> Monika Yadav,<sup>†</sup> Brandon J. Anson,<sup>‡</sup>*

*Emma K. Lendy,<sup>‡</sup> Shin-ichiro Hattori,<sup>§</sup> Nobuyo Higashi-Kuwata,<sup>§</sup> Hiroaki Mitsuya,<sup>§, #, ±</sup> and*

*Andrew D. Mesecar<sup>‡, †</sup>*

<sup>†</sup>Department of Chemistry and Department of Medicinal Chemistry, Purdue University, West Lafayette, IN 47907, USA; <sup>‡</sup>Department of Biological Sciences, Purdue University, West Lafayette, IN 47907, USA; <sup>‡</sup>Department of Biochemistry, Purdue University, West Lafayette, IN 47907, USA; <sup>§</sup>Departments of Hematology and Infectious Diseases, Kumamoto University School of Medicine, Kumamoto 860-8556, Japan; <sup>#</sup>Experimental Retrovirology Section, HIV and AIDS Malignancy Branch, National Cancer Institute, Bethesda, MD 20892; <sup>±</sup>Department of Refractory Viral Infections, National Center for Global Health and Medicine Research Institute, Shinjuku, Tokyo 162-8655, Japan

The corresponding author, e-mail: [akghosh@purdue.edu](mailto:akghosh@purdue.edu)

### Table of Contents

|                                                      |         |
|------------------------------------------------------|---------|
| General Methods.....                                 | S2      |
| X-ray crystallographic data Table.....               | S2      |
| Virus and cell biology.....                          | S3      |
| Immunochemistry assay.....                           | S4      |
| <sup>1</sup> H- and <sup>13</sup> C-NMR Spectra..... | S5-S46  |
| HPLC traces for inhibitors .....                     | S47-S88 |

## General Methods.

All reactions were carried out under an argon atmosphere in either flame or oven-dried (120 °C) glassware. All reagents and chemicals were purchased from commercial suppliers and used without further purification unless otherwise noted. Anhydrous solvents were obtained as follows: Dichloromethane from calcium hydride, diethyl ether and tetrahydrofuran from Na/Benzophenone, methanol and ethanol from activated magnesium under argon. All purification procedures were carried out with reagent grade solvents (purchased from VWR) in air. TLC analysis was conducted using glass-backed Thin-Layer Silica Gel Chromatography Plates (60 Å, 250 µm thickness, F-254 indicator). Column chromatography was performed using 230-400 mesh, 60 Å pore diameter silica gel. <sup>1</sup>H, <sup>13</sup>C NMR spectra were recorded at room temperature on a Bruker AV-III-400 and AV-III-800. Chemical shifts ( $\delta$  values) are reported in parts per million, and are referenced to the deuterated residual solvent peak. NMR data is reported as:  $\delta$  value (chemical shift, J-value (Hz), integration, where s = singlet, d = doublet, t = triplet, q = quartet, brs = broad singlet). LRMS and HRMS spectra were recorded at the Purdue University Department of Chemistry Mass Spectrometry Center. HPLC analysis was done on an Agilent 1260 series instrument using a YMC Pack ODS-A column of 4.6 mm ID for analysis. The purity of all test compounds was determined by HPLC analysis to be  $\geq 90\%$  pure.

## Determination of X-ray structure of 3CL protease-inhibitor complex

**Table S1:** Crystallographic Data Collection and Refinement Statistics

| <b>3CLpro-Inhibitor Complex</b>   | Compound <b>2</b> (GRL-01720) bound to SARS-CoV-2 | Compound <b>9d</b> (GRL-09120) bound to SARS-CoV-2 | Compound <b>7b</b> (GRL-0686) bound to SARS-CoV |
|-----------------------------------|---------------------------------------------------|----------------------------------------------------|-------------------------------------------------|
| Resolution range (Å)              | 27.08 - 1.649<br>(1.708 - 1.649)                  | 29.83 - 1.646<br>(1.705 - 1.646)                   | 30.58 - 1.63<br>(1.688 - 1.63)                  |
| Space group                       | C 1 2 1                                           | C 1 2 1                                            | C 1 2 1                                         |
| Unit cell (Å)                     |                                                   |                                                    |                                                 |
| a                                 | 96.50                                             | 97.20                                              | 106.73                                          |
| b                                 | 82.14                                             | 82.43                                              | 84.47                                           |
| c                                 | 54.38                                             | 54.28                                              | 53.50                                           |
| $\beta$ (degrees)                 | 116.9                                             | 117.2°                                             | 105.1°                                          |
| Total reflections                 | 218414 (22139)                                    | 220813 (21442)                                     | 402081 (24801)                                  |
| Unique reflections                | 45449 (4502)                                      | 45866 (4440)                                       | 56039 (4949)                                    |
| Multiplicity                      | 4.8 (4.9)                                         | 4.8 (4.8)                                          | 7.2 (5.0)                                       |
| Completeness (%)                  | 99.79 (99.40)                                     | 99.53 (96.86)                                      | 97.67 (85.93)                                   |
| Mean I/sigma(I)                   | 16.18 (2.42)                                      | 17.86 (2.15)                                       | 23.62 (2.00)                                    |
| Wilson B-factor (Å <sup>2</sup> ) | 20.98                                             | 22.09                                              | 27.55                                           |
| R-merge                           | 0.07787 (0.5886)                                  | 0.07269 (0.7296)                                   | 0.05835 (0.5505)                                |
| R-meas                            | 0.08759 (0.6578)                                  | 0.08167 (0.8192)                                   | 0.0633 (0.6047)                                 |
| R-pim                             | 0.03933 (0.2891)                                  | 0.03674 (0.3683)                                   | 0.02408 (0.2451)                                |

|                                    |                 |                 |                 |
|------------------------------------|-----------------|-----------------|-----------------|
| CC1/2                              | 0.997 (0.86)    | 0.998 (0.777)   | 0.998 (0.938)   |
| CC*                                | 0.999 (0.962)   | 1 (0.935)       | 0.999 (0.984)   |
| Reflections used in refinement     | 45440 (4498)    | 45864 (4440)    | 55826 (4910)    |
| Reflections used for R-free        | 2000 (198)      | 2000 (194)      | 1990 (174)      |
| R-work                             | 0.1712 (0.2307) | 0.1572 (0.2197) | 0.1905 (0.3228) |
| R-free                             | 0.1940 (0.2776) | 0.1841 (0.2597) | 0.2219 (0.3472) |
| CC(work)                           | 0.961 (0.918)   | 0.972 (0.905)   | 0.940 (0.917)   |
| CC(free)                           | 0.958 (0.782)   | 0.969 (0.827)   | 0.914 (0.925)   |
| Number of non-hydrogen atoms       | 2580            | 2668            | 2806            |
| macromolecules                     | 2353            | 2386            | 2436            |
| ligands                            | 11              | 11              | 43              |
| solvent                            | 216             | 271             | 327             |
| Protein residues                   | 301             | 302             | 306             |
| RMS(bonds)                         | 0.011           | 0.011           | 0.006           |
| RMS(angles)                        | 1.43            | 1.39            | 0.77            |
| Ramachandran favored (%)           | 98.33           | 98.67           | 98.36           |
| Ramachandran allowed (%)           | 1.34            | 1.33            | 1.64            |
| Ramachandran outliers (%)          | 0.33            | 0.00            | 0.00            |
| Rotamer outliers (%)               | 1.53            | 2.26            | 0.73            |
| Clashscore                         | 2.78            | 3.59            | 7.13            |
| Average B-factor (Å <sup>2</sup> ) | 35.79           | 34.85           | 45.47           |
| macromolecules                     | 35.45           | 33.92           | 43.97           |
| ligands                            | 40.97           | 58.67           | 68.45           |
| solvent                            | 39.18           | 42.04           | 53.60           |
| Number of TLS groups               | 1               | 1               | 15              |

### Cells, viruses, and antiviral activity.

VeroE6 cells and TMPRSS2-overexpressing VeroE6 (VeroE6TMPRSS2) cells were obtained from the Japanese Collection of Research Bioresources (JCRB) Cell Bank (Osaka, Japan). VeroE6 cells were maintained in Dulbecco's modified Eagle's medium (d-MEM) supplemented with 10% fetal bovine serum (FCS), 100 µg/ml of penicillin, and 100 µg/ml of streptomycin. VeroE6TMPRSS2 cells were maintained in d-MEM as reported (ref.1) in the presence of 1 mg/ml of G418. SARS-CoV-2 strain JPN/TY/WK-521 (SARS-CoV-2WK-521) was obtained from the National Institute of Infectious Diseases (Tokyo, Japan).

Antiviral assay was carried out as described recently (ref 1): Cells were seeded in a 96-well plate (2x10<sup>4</sup> cells/well) and incubated. After 24 h, virus was inoculated into cells at multiplicity of infection (MOI) of 0.05. After an additional 72 h, cell culture supernatants were harvested and viral RNA was extracted using a QIAamp viral RNA minikit (Qiagen, Hilden, Germany), and

quantitative RT-PCR (RT-qPCR) was then performed using One Step PrimeScript III RT-qPCR mix (TaKaRa Bio, Shiga, Japan) following the instructions of the manufacturers. The primers and probe used for detecting SARS-CoV-2 envelope (6) were 5'-ACT TCT TTT TCT TGC TTT CGT GGT-3' (forward), 5'-GCA GCA GTA CGC ACA CAA TC-3' (reverse), and 5'-FAM-CTA GTT ACA CTA GCC ATC CTT ACT GC-black hole quencher 1 (BHQ1)-3' (probe). To determine the cytotoxicity of each compound, cells were seeded in a 96-well plate (2\_104 cells/well). One day later, various concentrations of each compound were added, and cells were incubated for additional 3 days. The 50% cytotoxic concentrations (CC50) values were determined using the WST-8 assay and Cell Counting Kit-8 (Dojindo, Kumamoto, Japan).

### **Immunochemistry.**

Details are reported in a recent paper (ref.1). As described, cells in a 96-well microtiter culture plate were fixed with 4% paraformaldehyde-phosphate-buffered saline (PBS) for 15 min, washed with PBS (300 µl/well) three times for 5 min each time, and then blocked with a blocking buffer (10% goat serum, 1% bovine serum albumin [BSA], 0.3% Triton X-100, PBS 1x) for 1 h. The blocking buffer was removed and the cells were immediately stained with the primary antibody mouse monoclonal anti-SARS-CoV/SARS-CoV-2 (COVID-19) spike antibody (1A9) (GeneTex, Alton Pkwy Irvine, CA, USA) or a convalescent IgG fraction, which was isolated from serum of a convalescent COVID-19 individual using a spin column-based antibody purification kit (Cosmo Bio, Tokyo, Japan) overnight at 4°C. The stained cells were washed with PBS (300 µl/well) three times for 5 min each time, and the cells were incubated with secondary antibody goat polyclonal anti-mouse IgG-Alexa Fluor 488 antibody (Thermo Fisher Scientific, Waltham, MA, USA), or goat polyclonal anti-human IgG-Alexa Fluor 488 Fab fragment antibody (Jackson ImmunoResearch Laboratories, Inc., West Grove, PA, USA), together with Texas Red-X dye-conjugated phalloidin (Thermo Fisher Scientific) for F-actin visualization for 2 h. The cells were washed with PBS (300 µl/well) three times for 5 min each time, DAPI (4',6-diamidino-2-phenylindole) solution (Thermo Fisher Scientific)-PBS (50 µl/well) was added to stain nuclei. Signals were acquired with a Cytation 5 cell imaging multimode reader (BioTek, Winooski, VT, USA).

### References:

- [1] Reference: Hattori, S.-i.; Higshi-Kuwata, N.; Raghavaiah, J.; Das, D.; Bulut, H.; Davis, D. A.; Takamatsu, Y.; Matsuda, K.; Takamune, N.; Kishimoto, N.; Okamura, T.; Misumi, S.; Yarchoan, R.; Maeda, K.; Ghosh, A. K.; Mitsuya, H. GRL-0920, an Indole Chloropyridinyl Ester, Completely Blocks SARS-CoV-2 Infection. *mBio* **2020**, *11*, e01833-20.

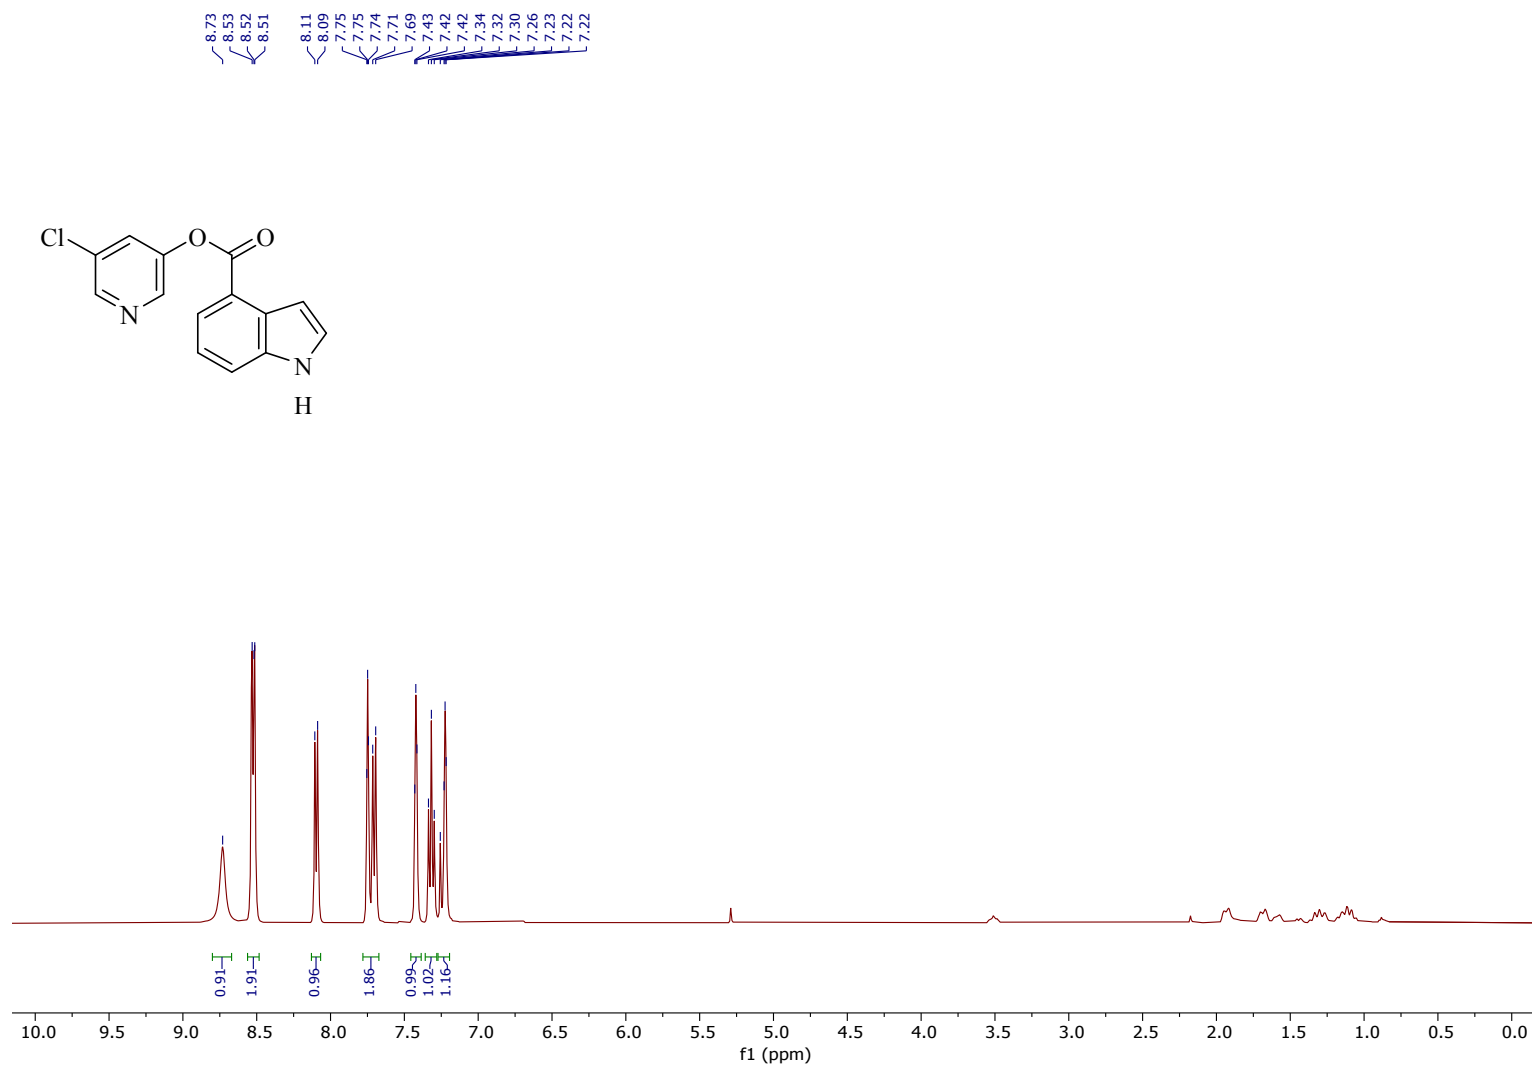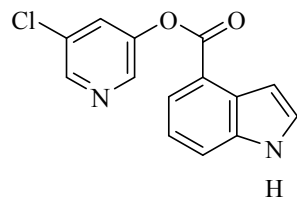

**<sup>1</sup>H NMR (400 MHz, CDCl<sub>3</sub>) of Compound 1**

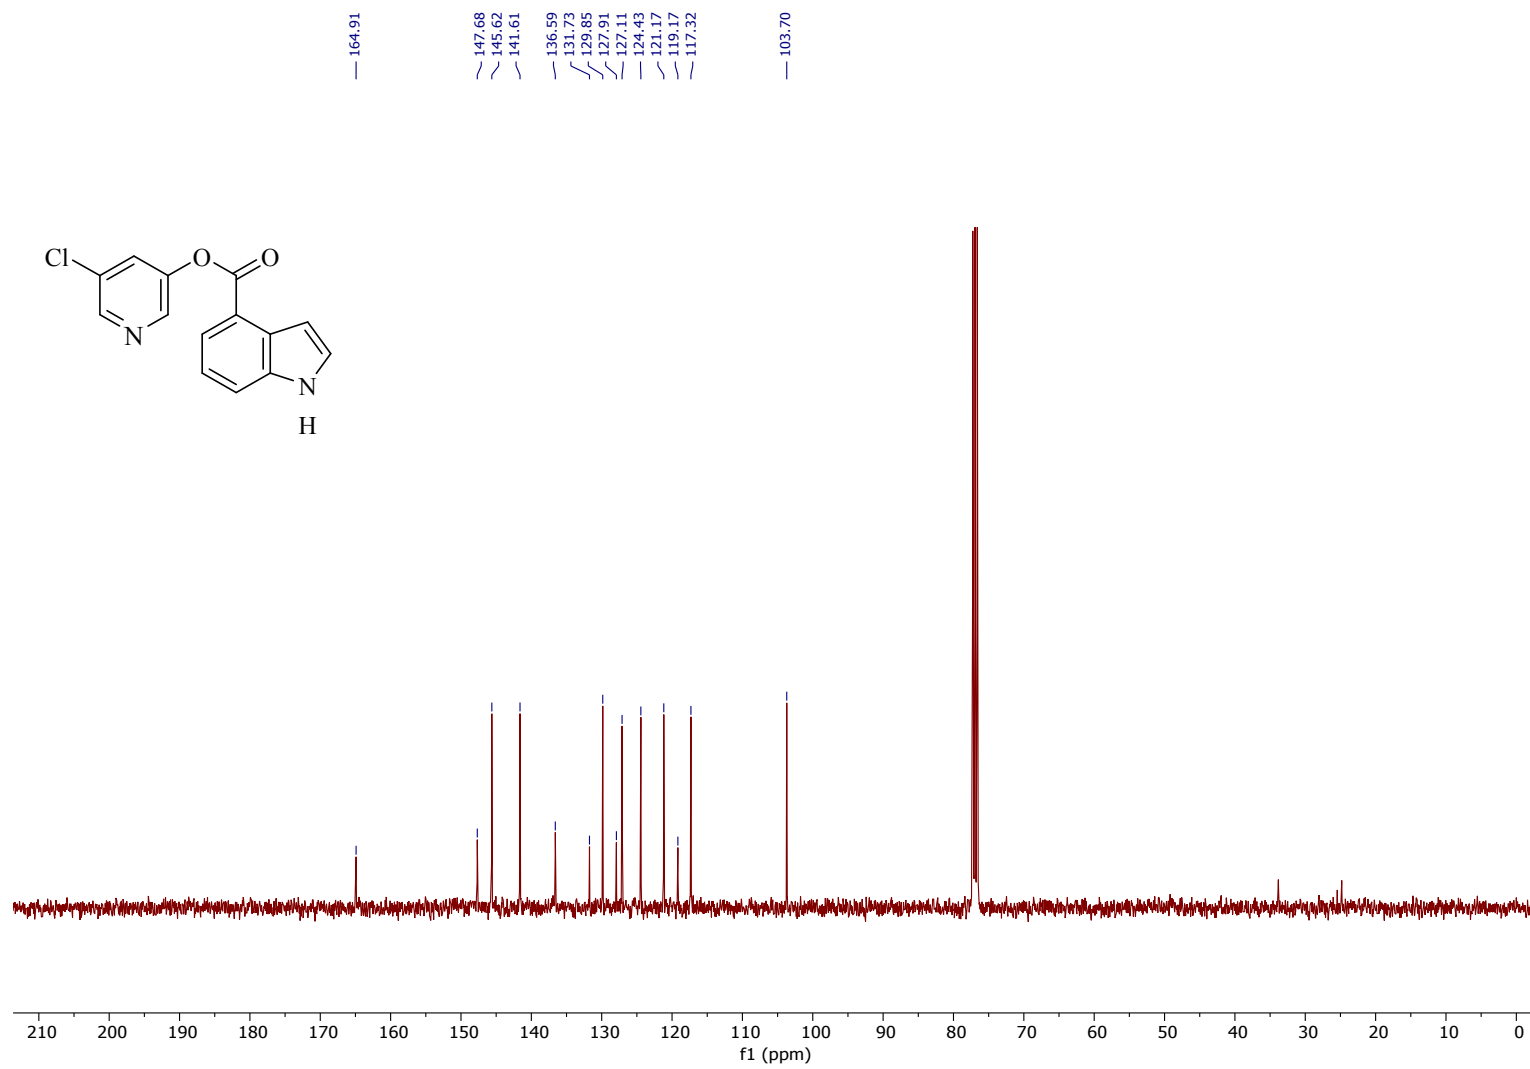

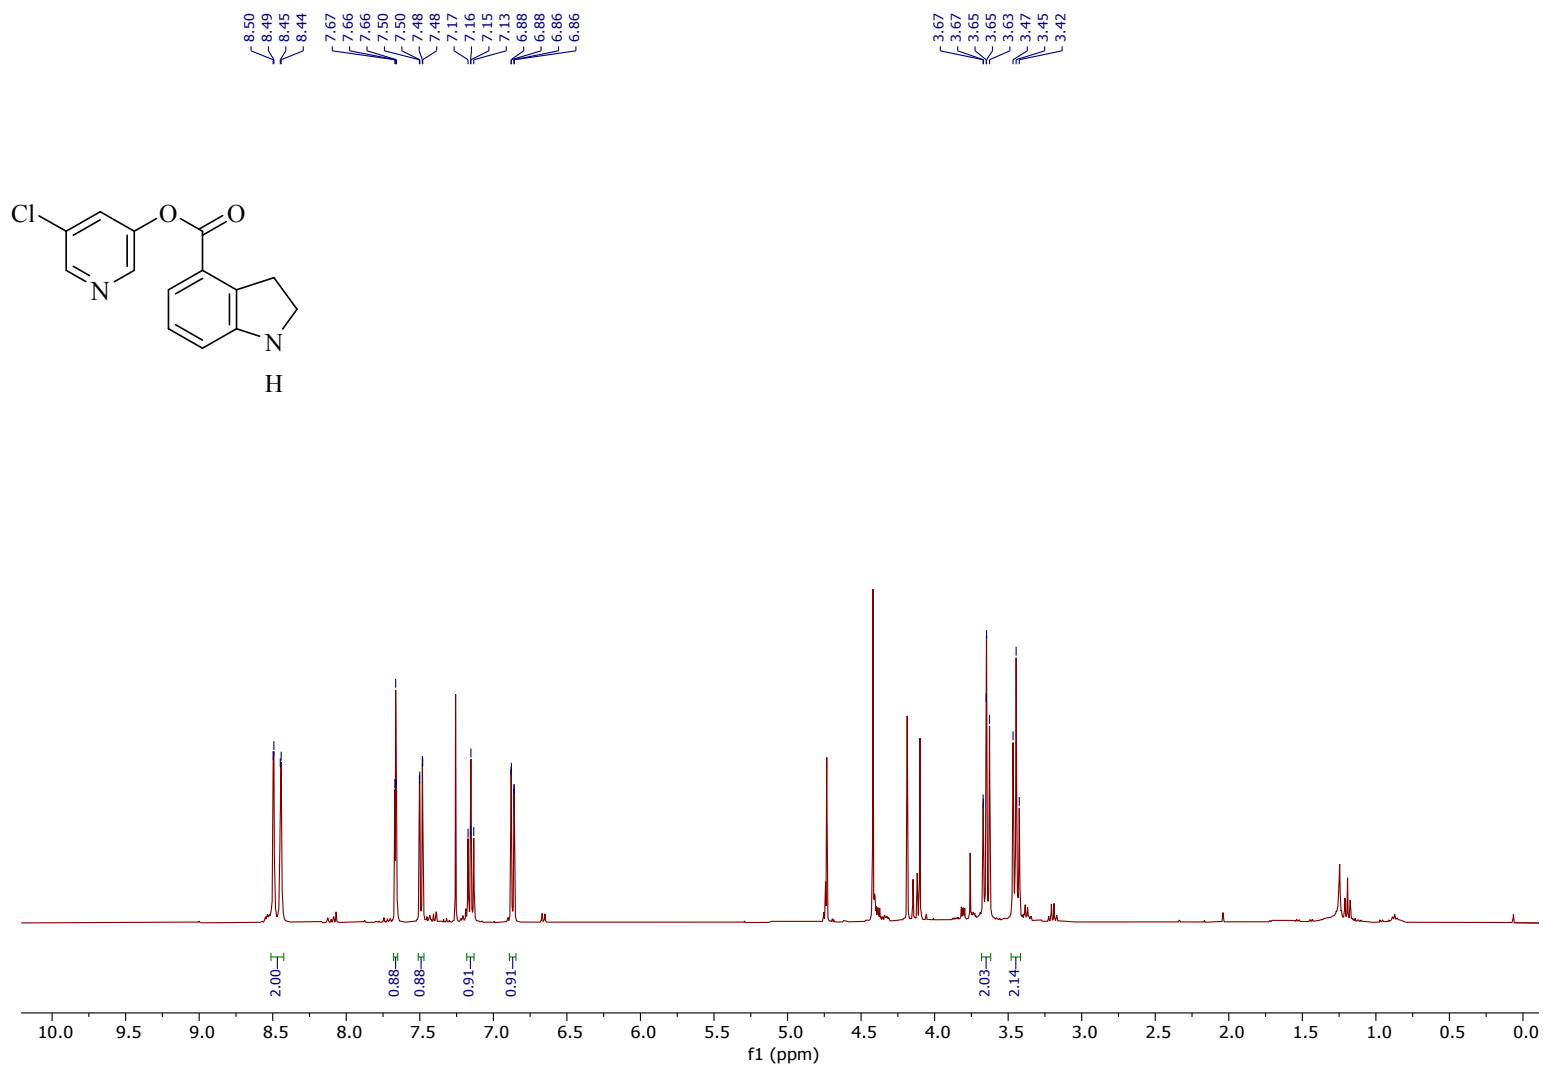

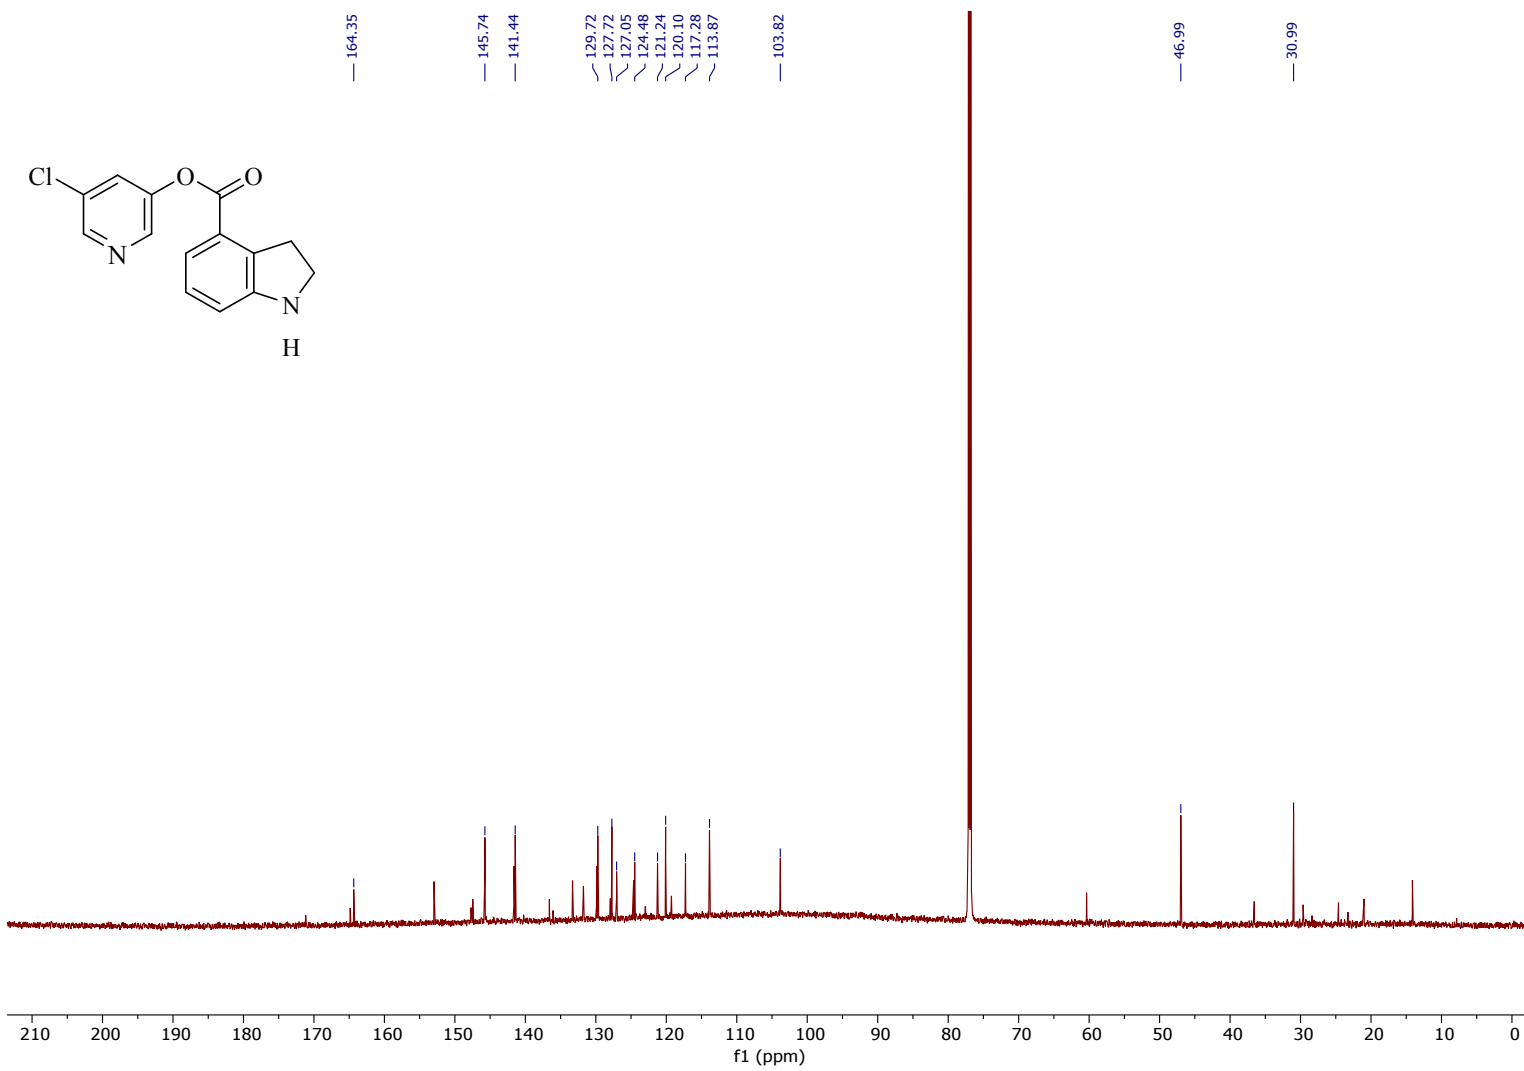

<sup>13</sup>C NMR (200 MHz, CDCl<sub>3</sub>) of Compound 2



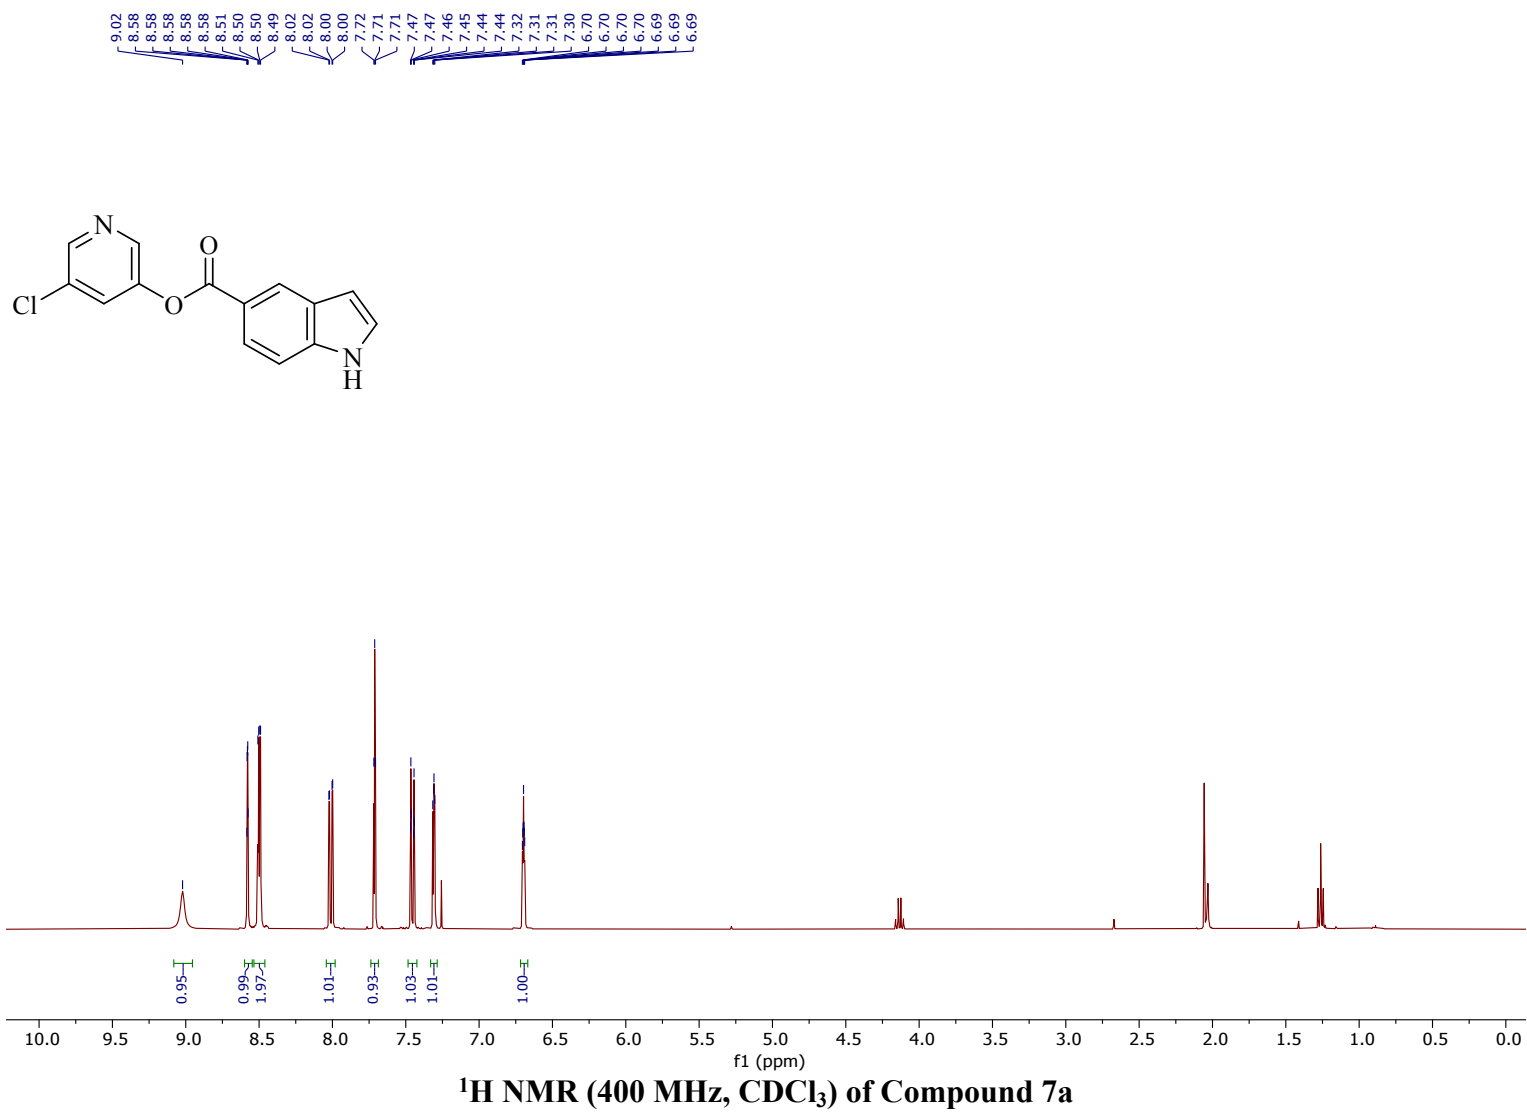

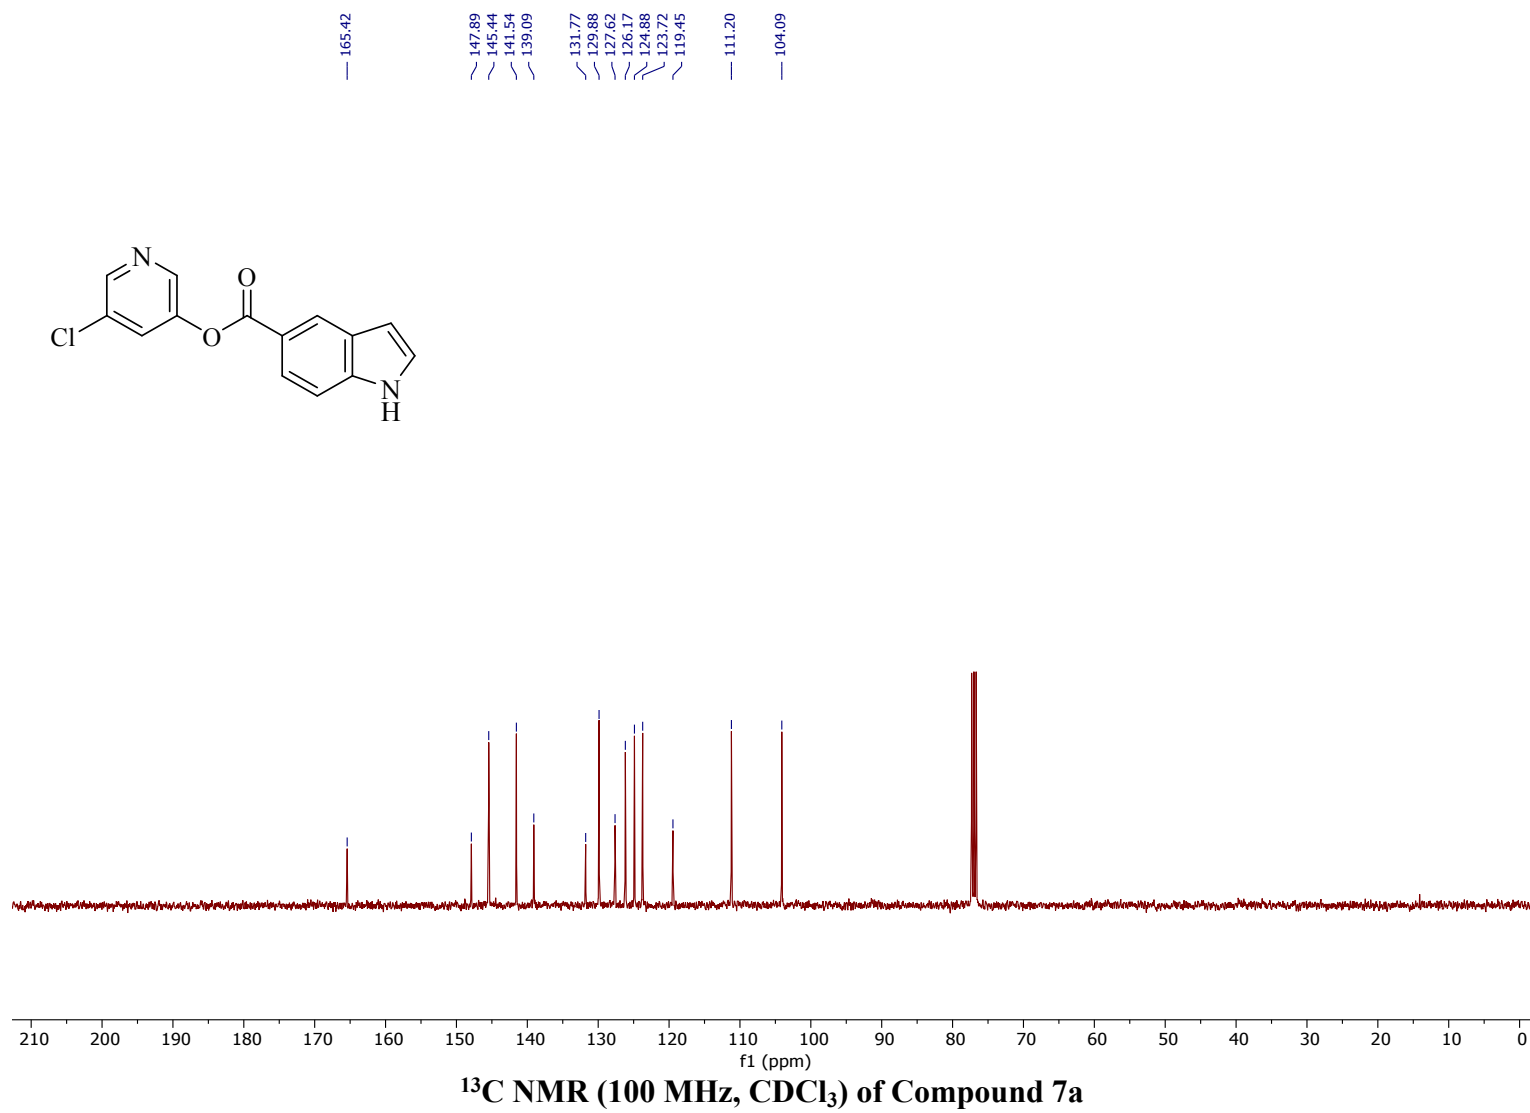

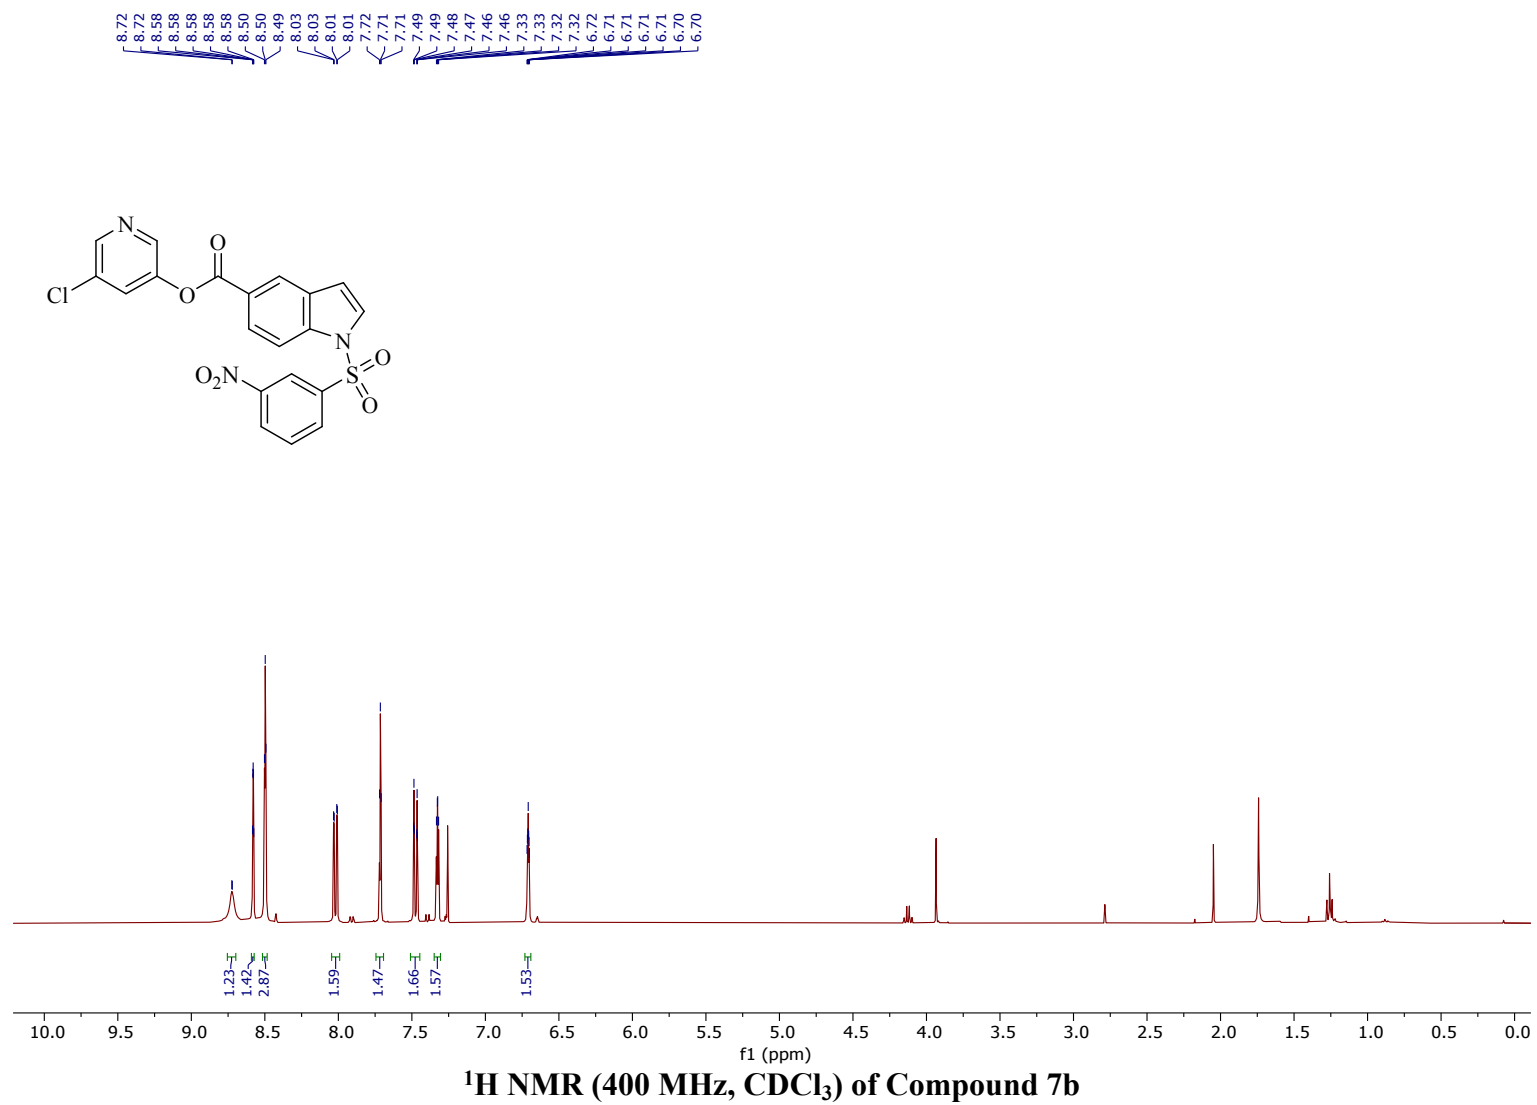

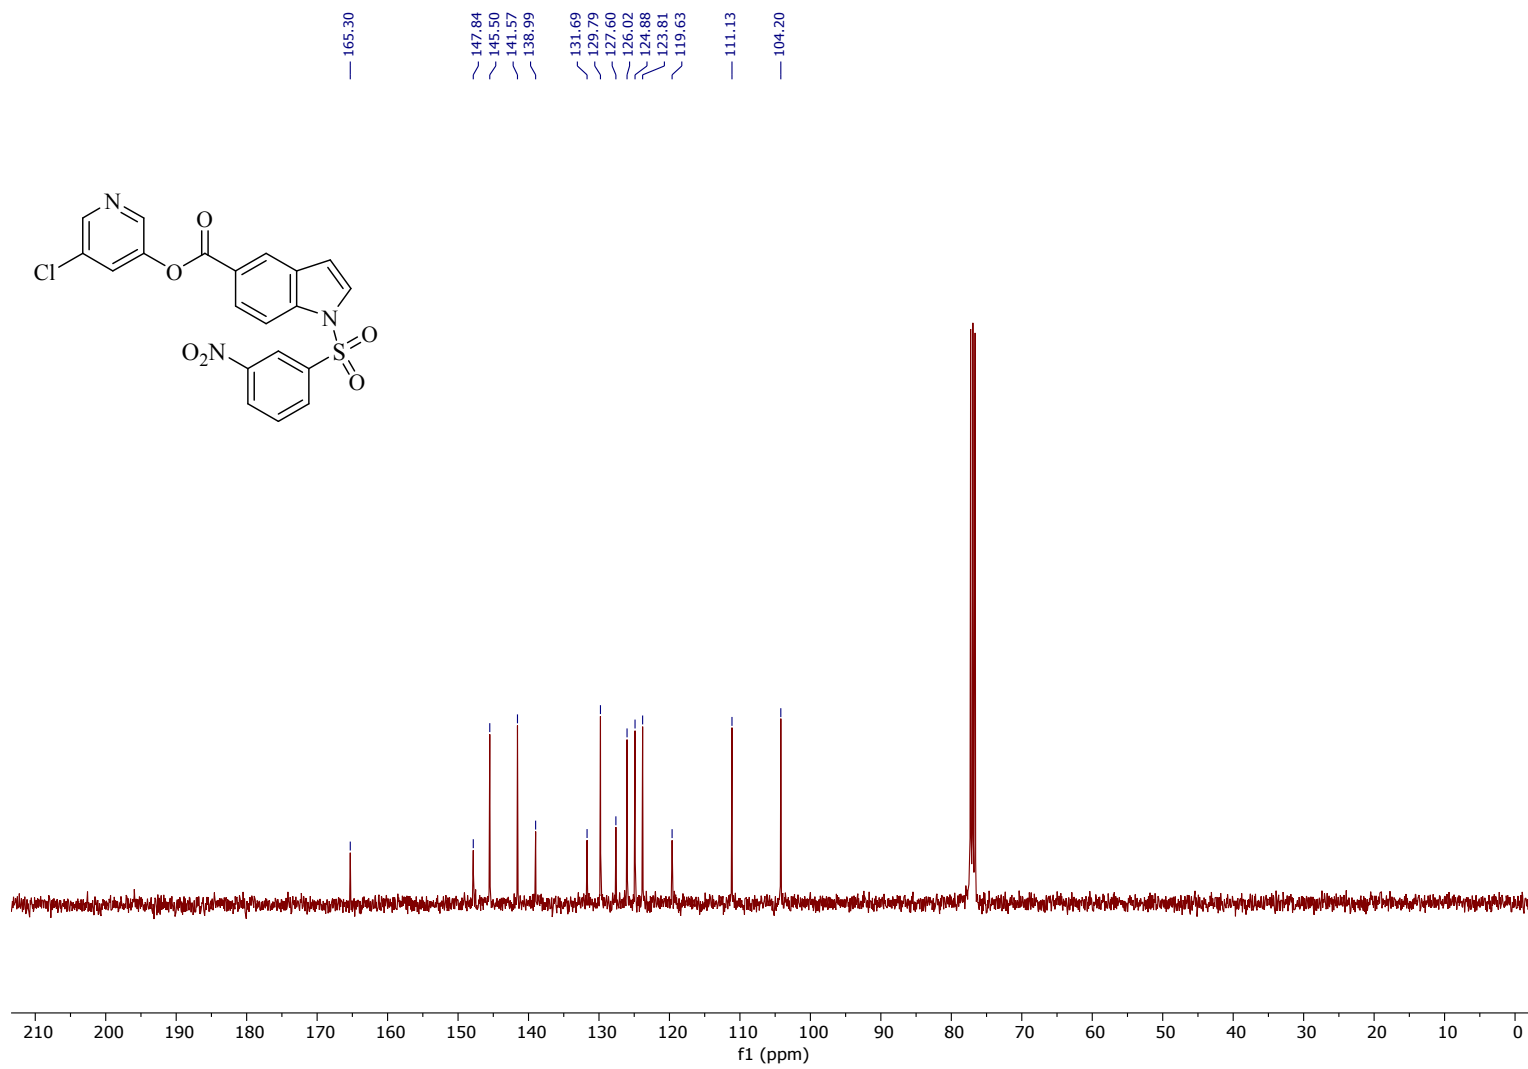

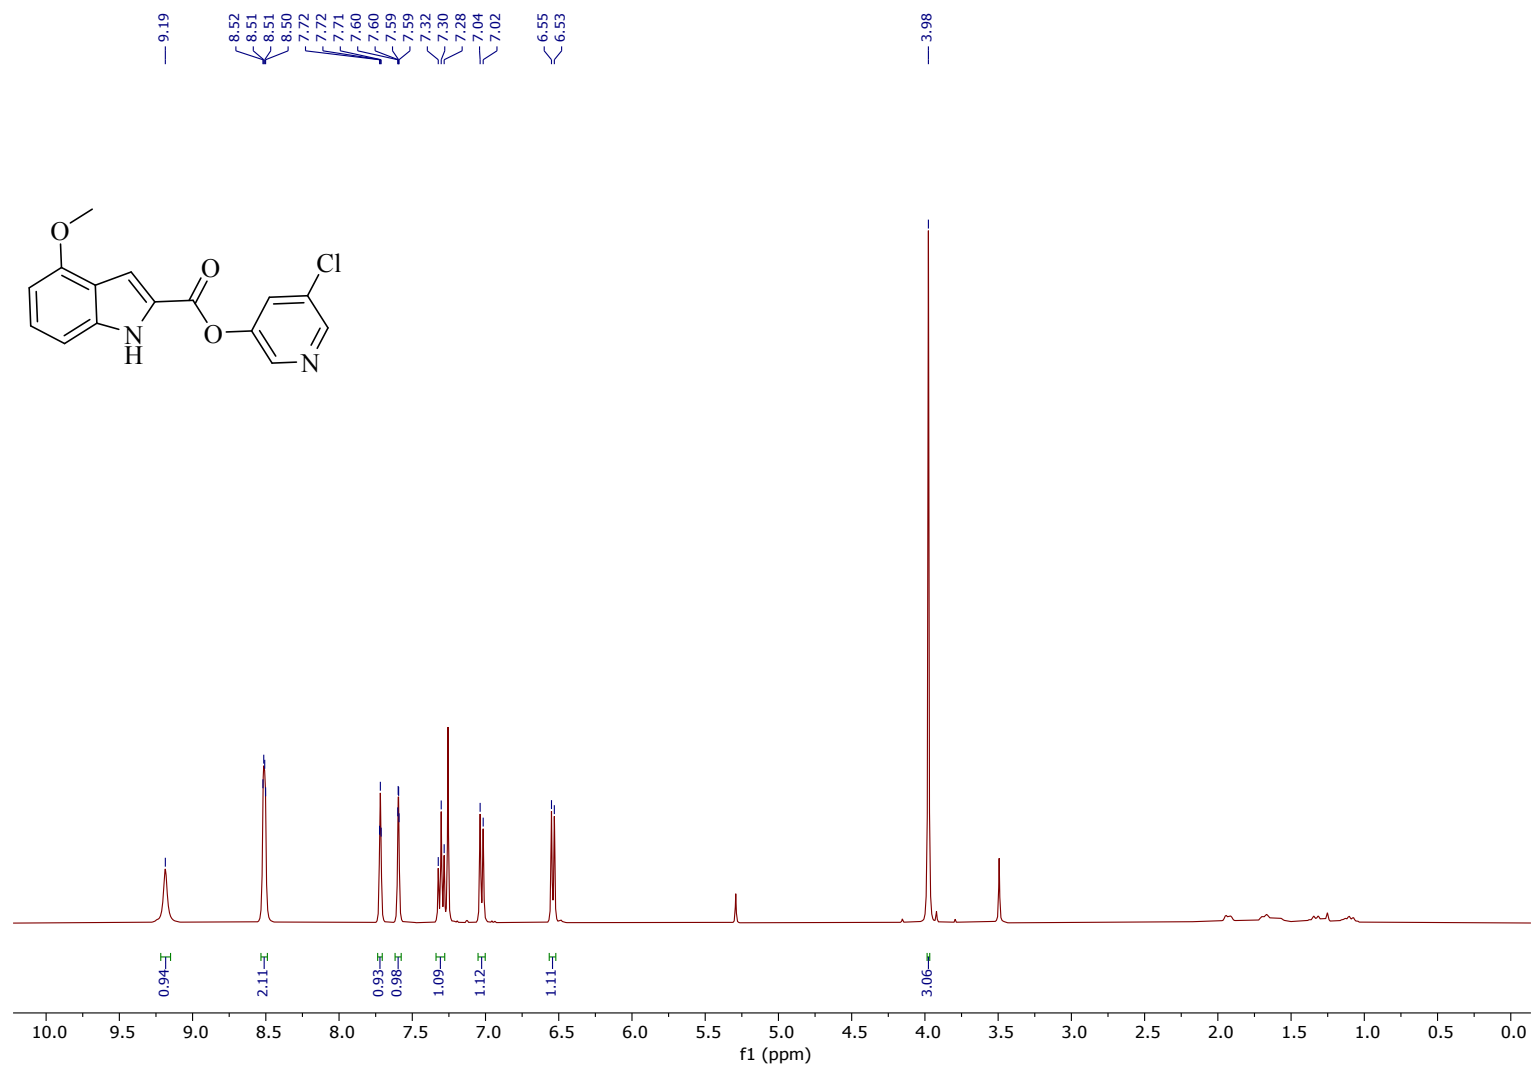

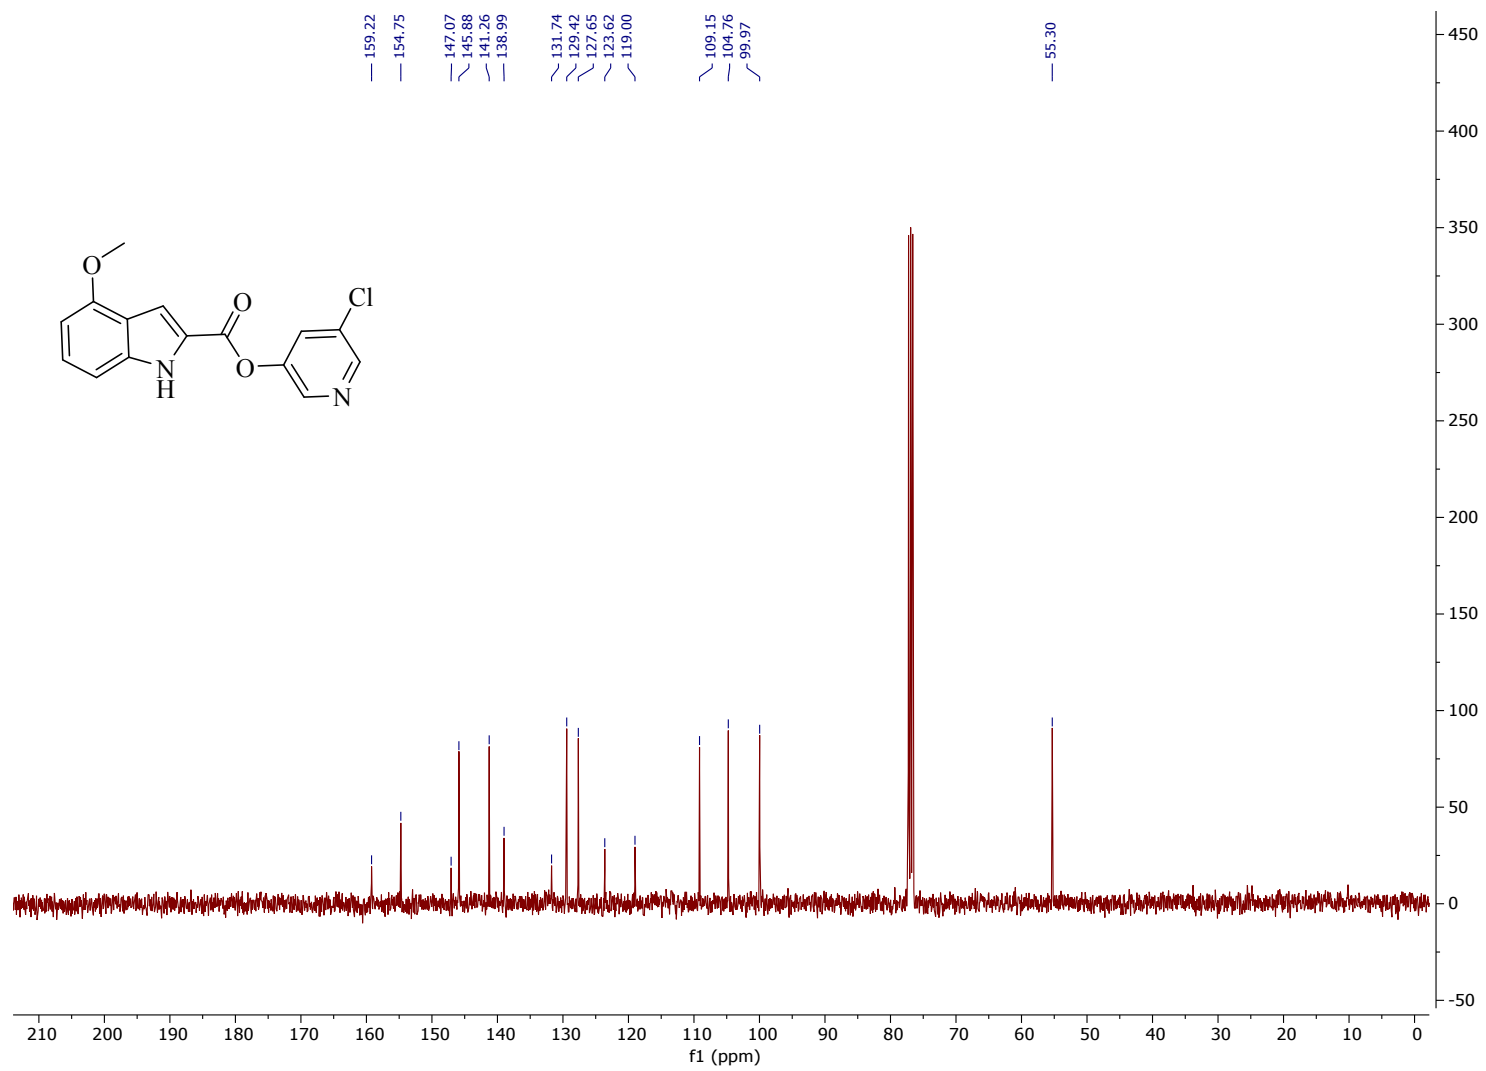

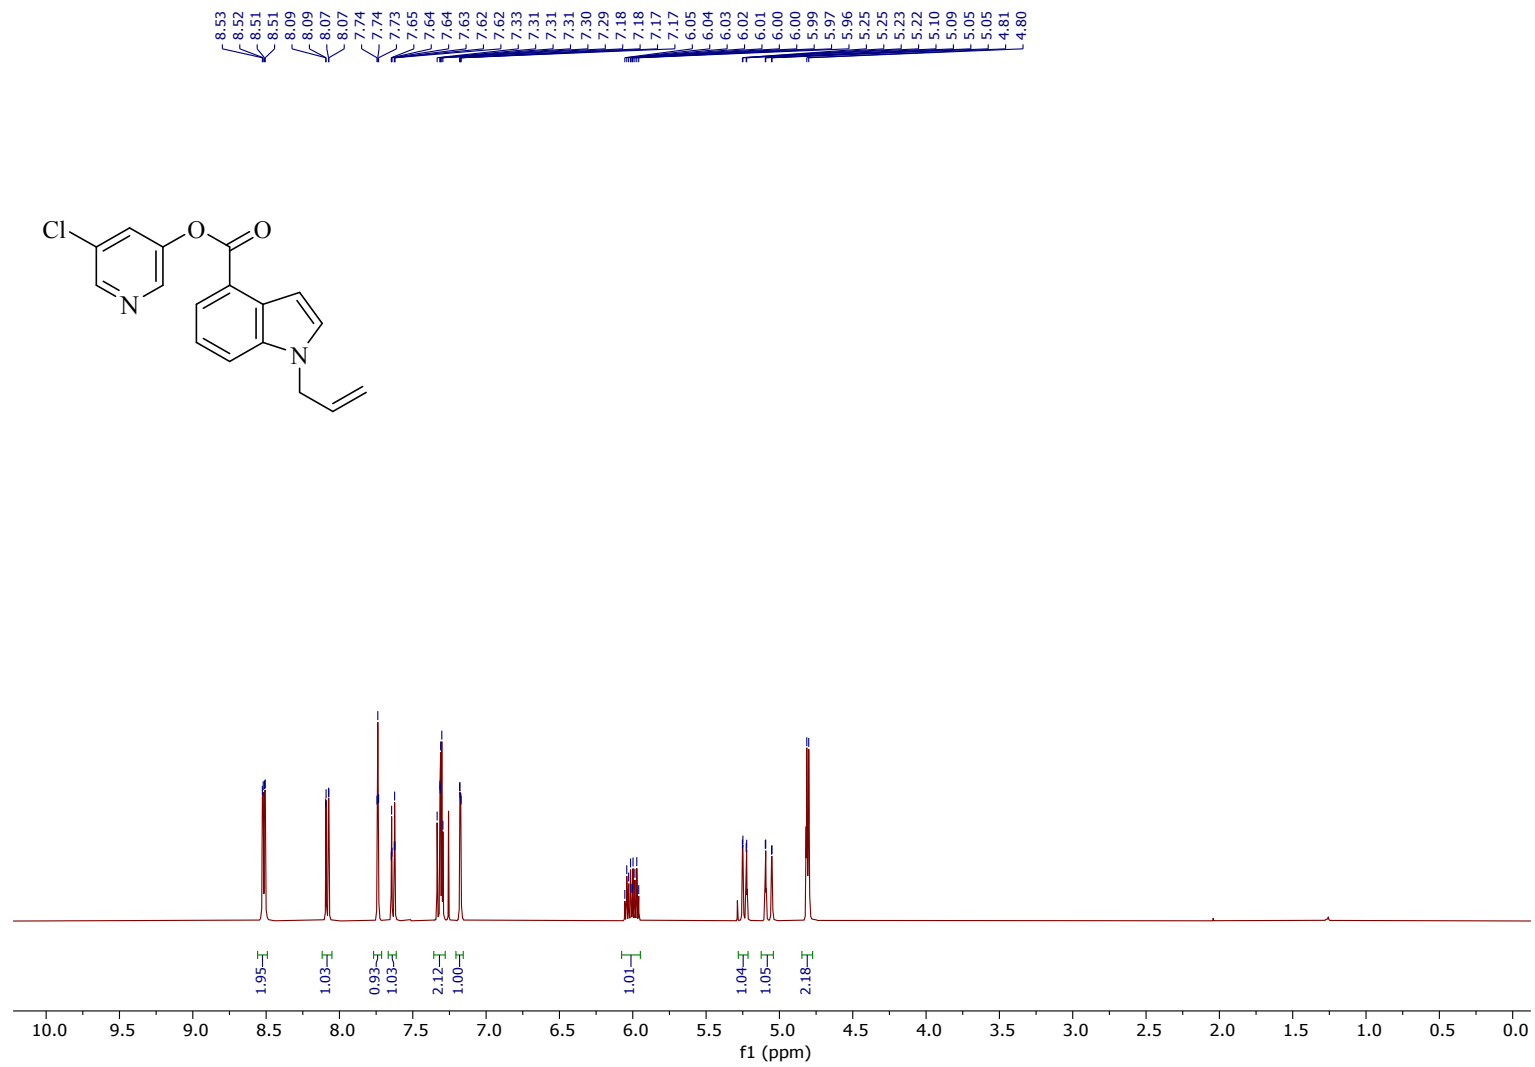

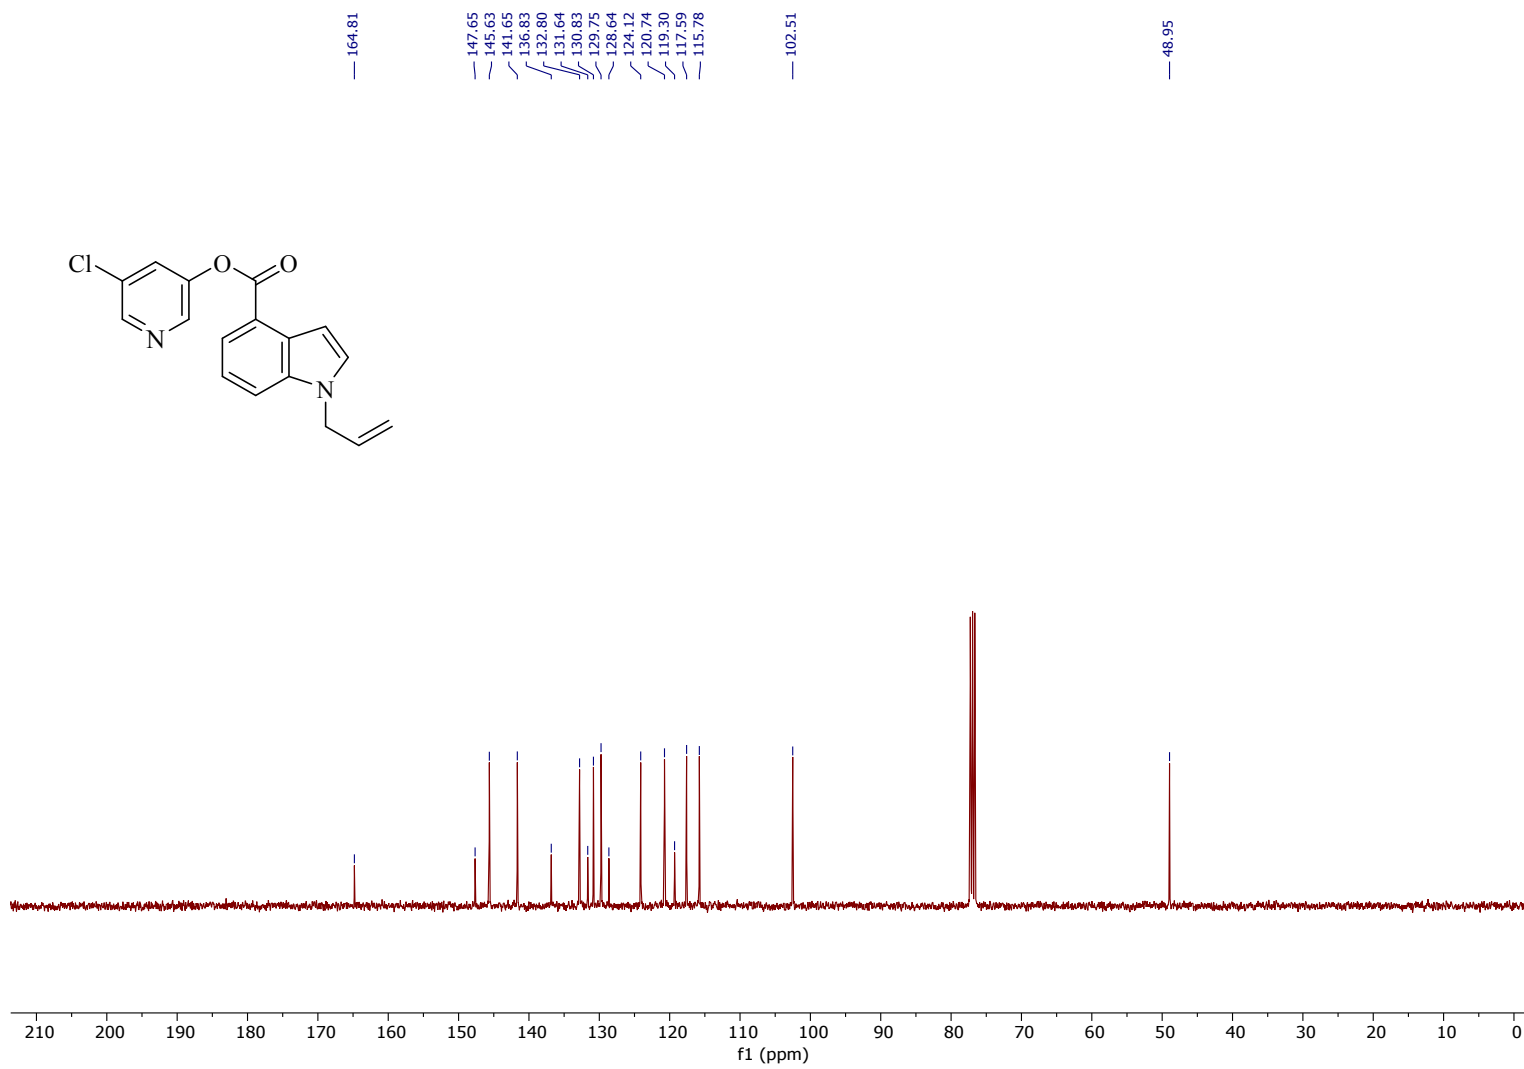



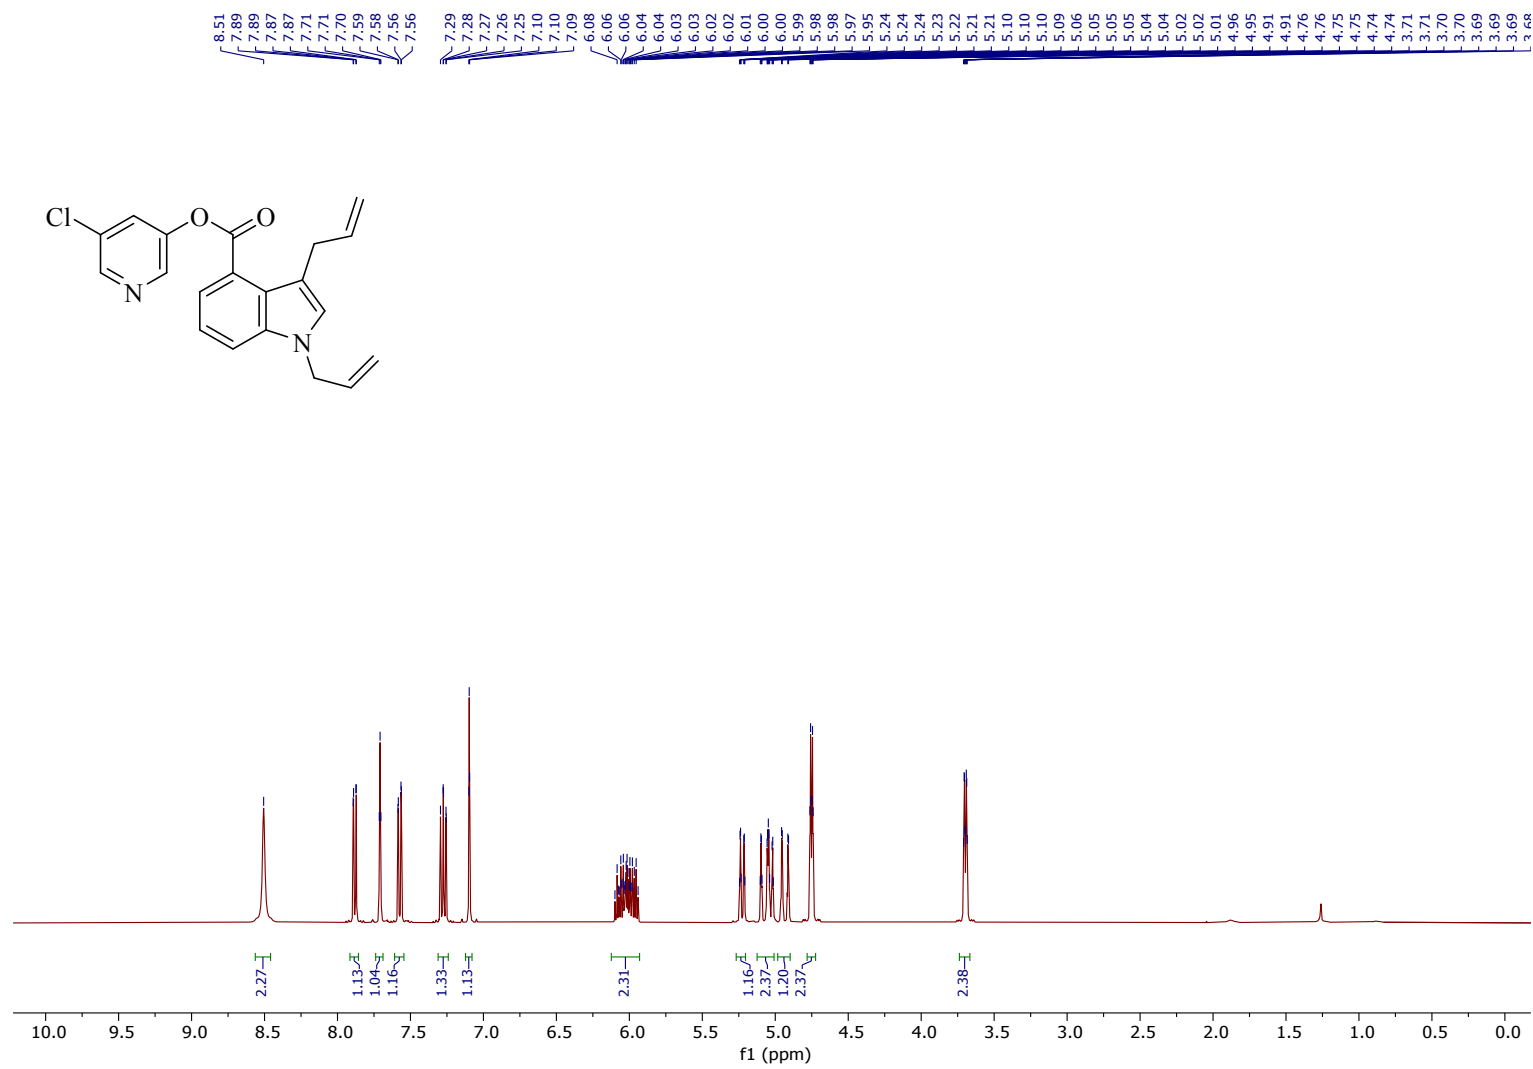

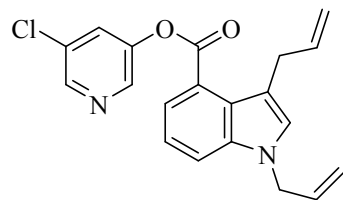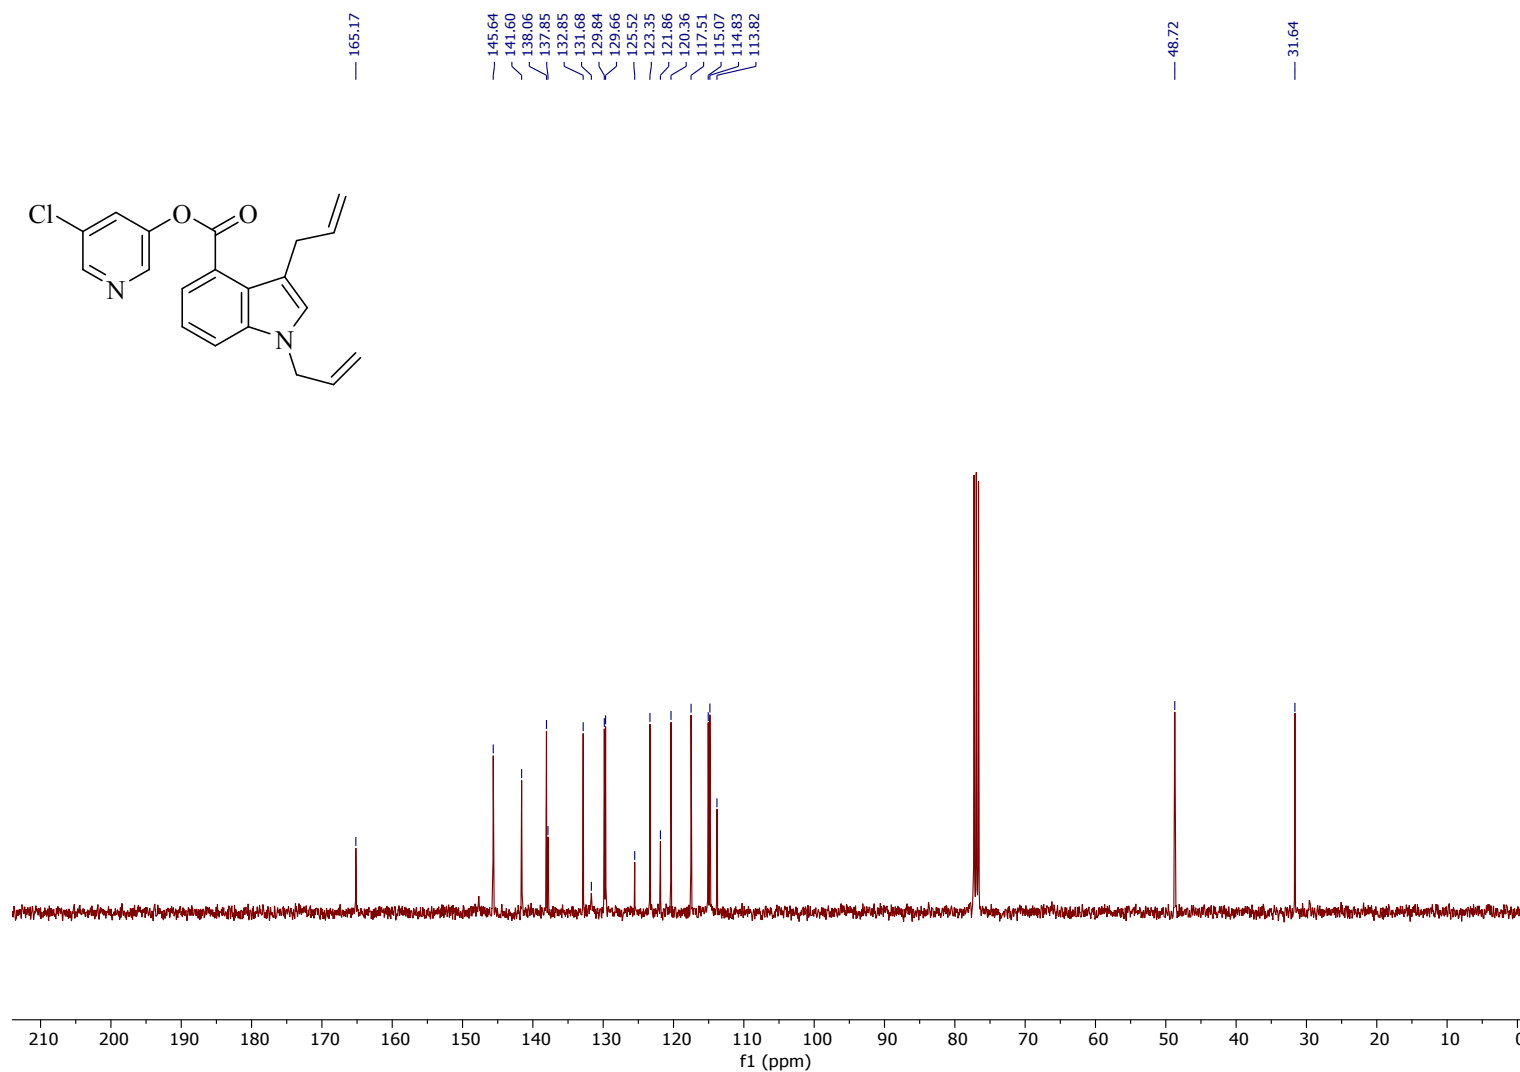

**$^{13}\text{C}$  NMR (100 MHz,  $\text{CDCl}_3$ ) of Compound 7e**

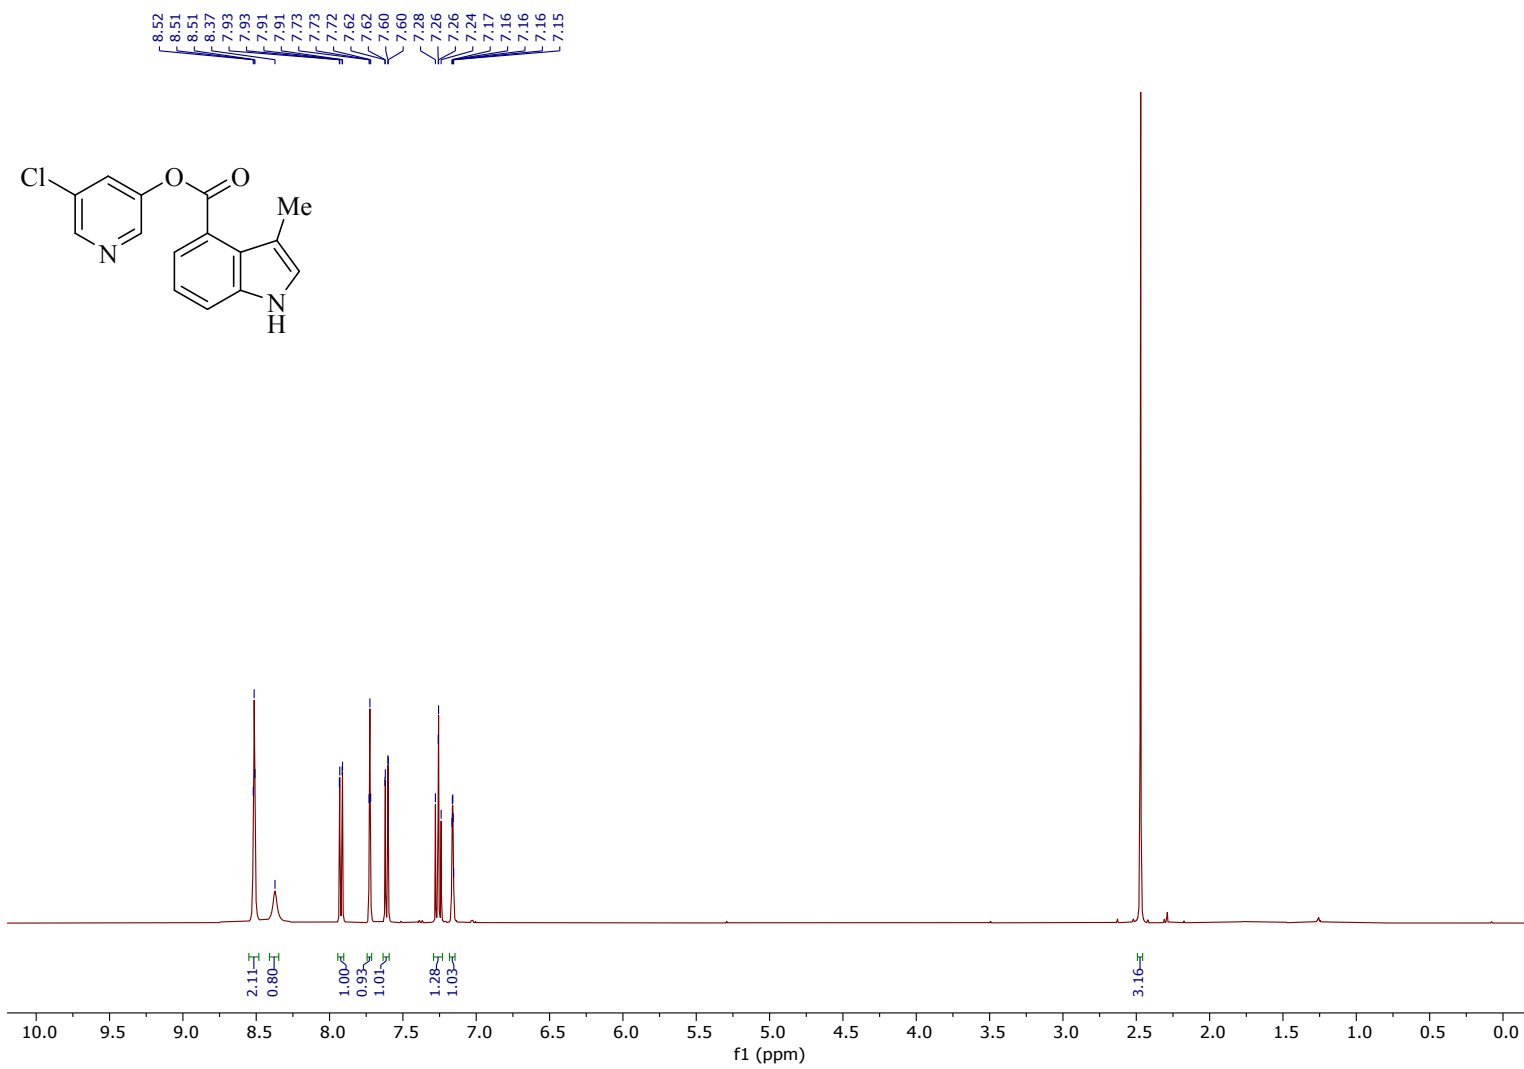

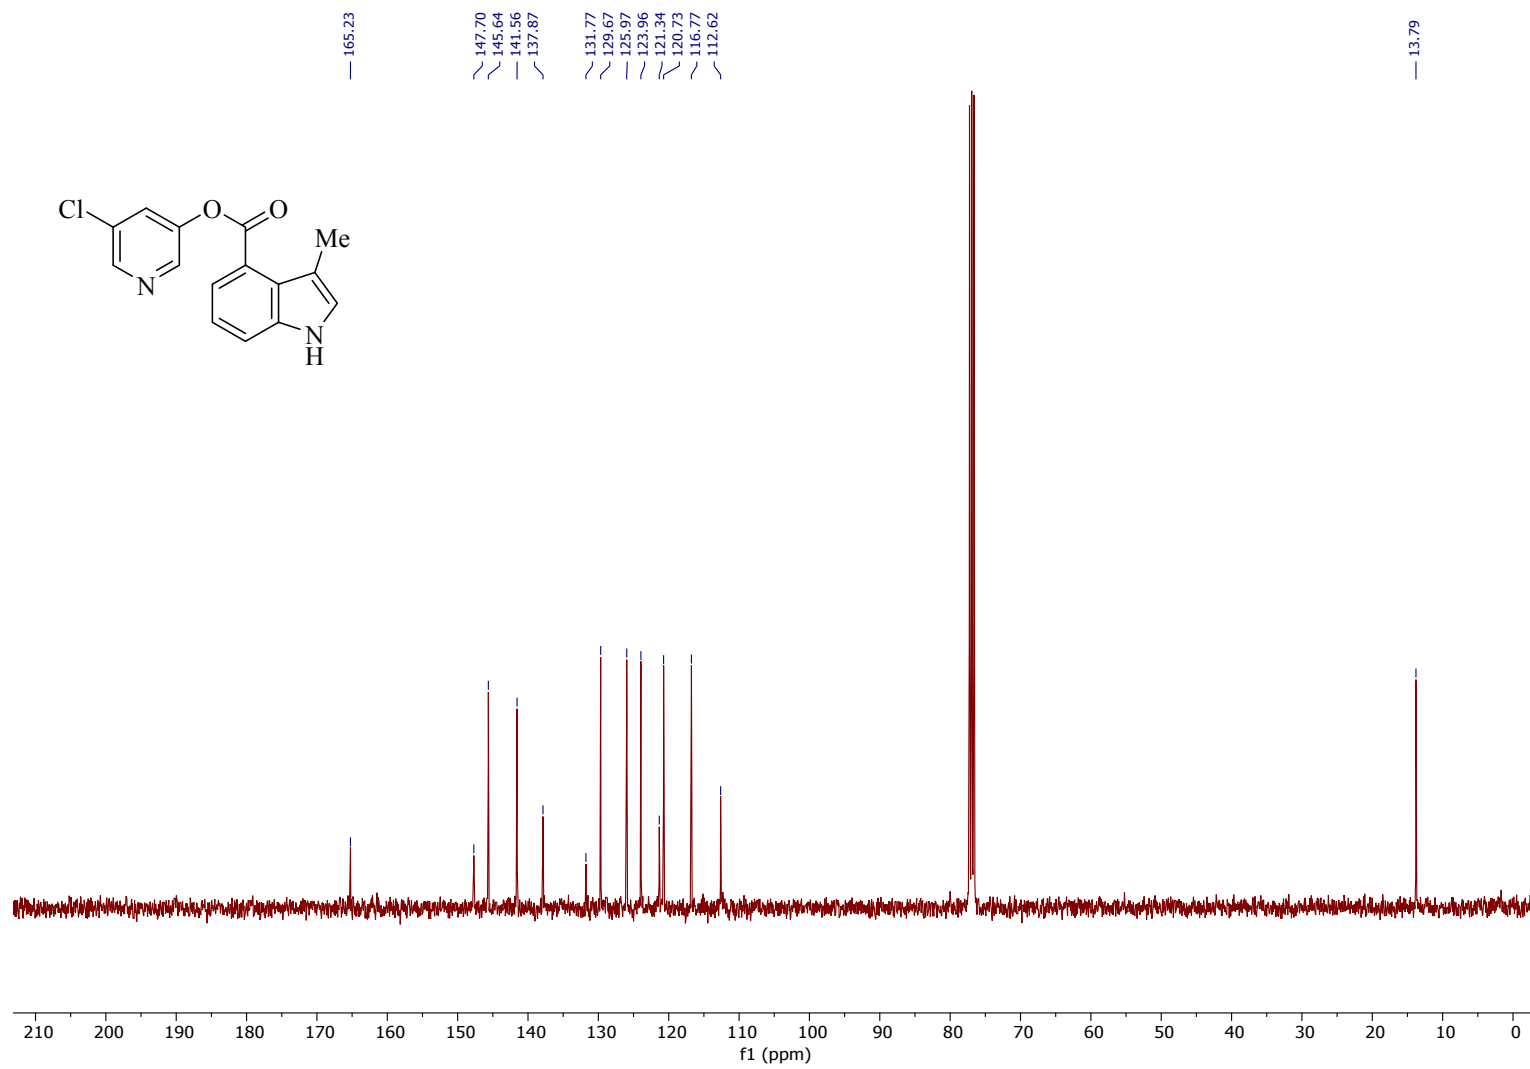

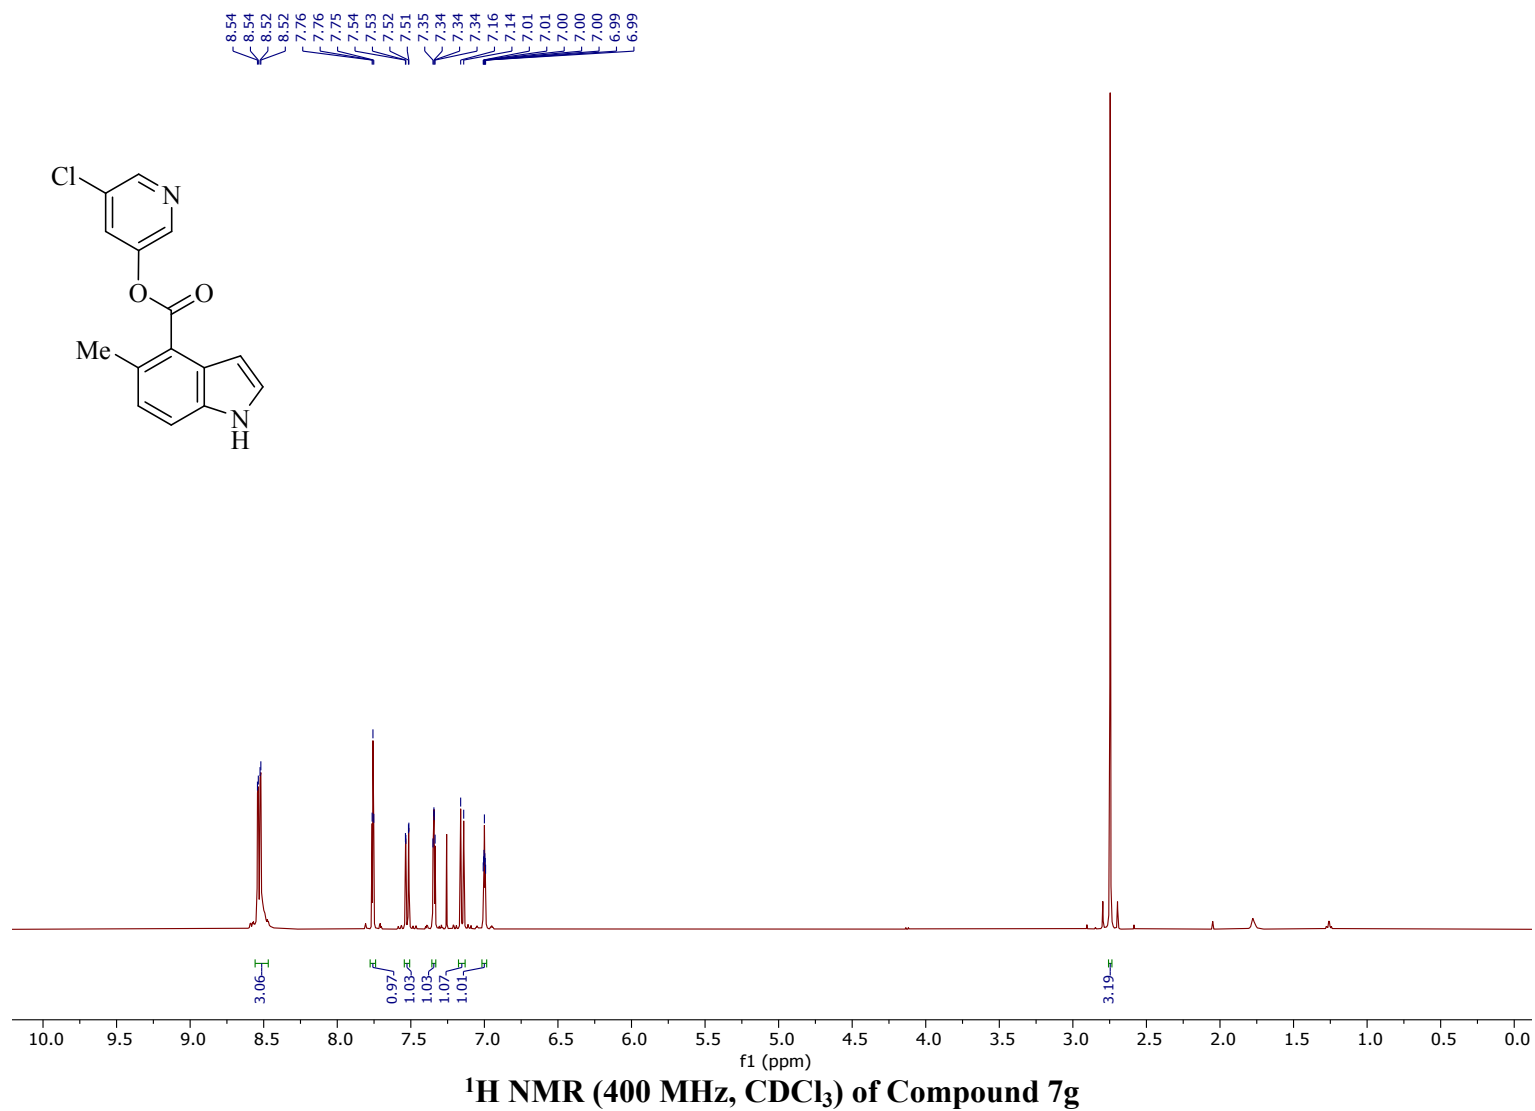

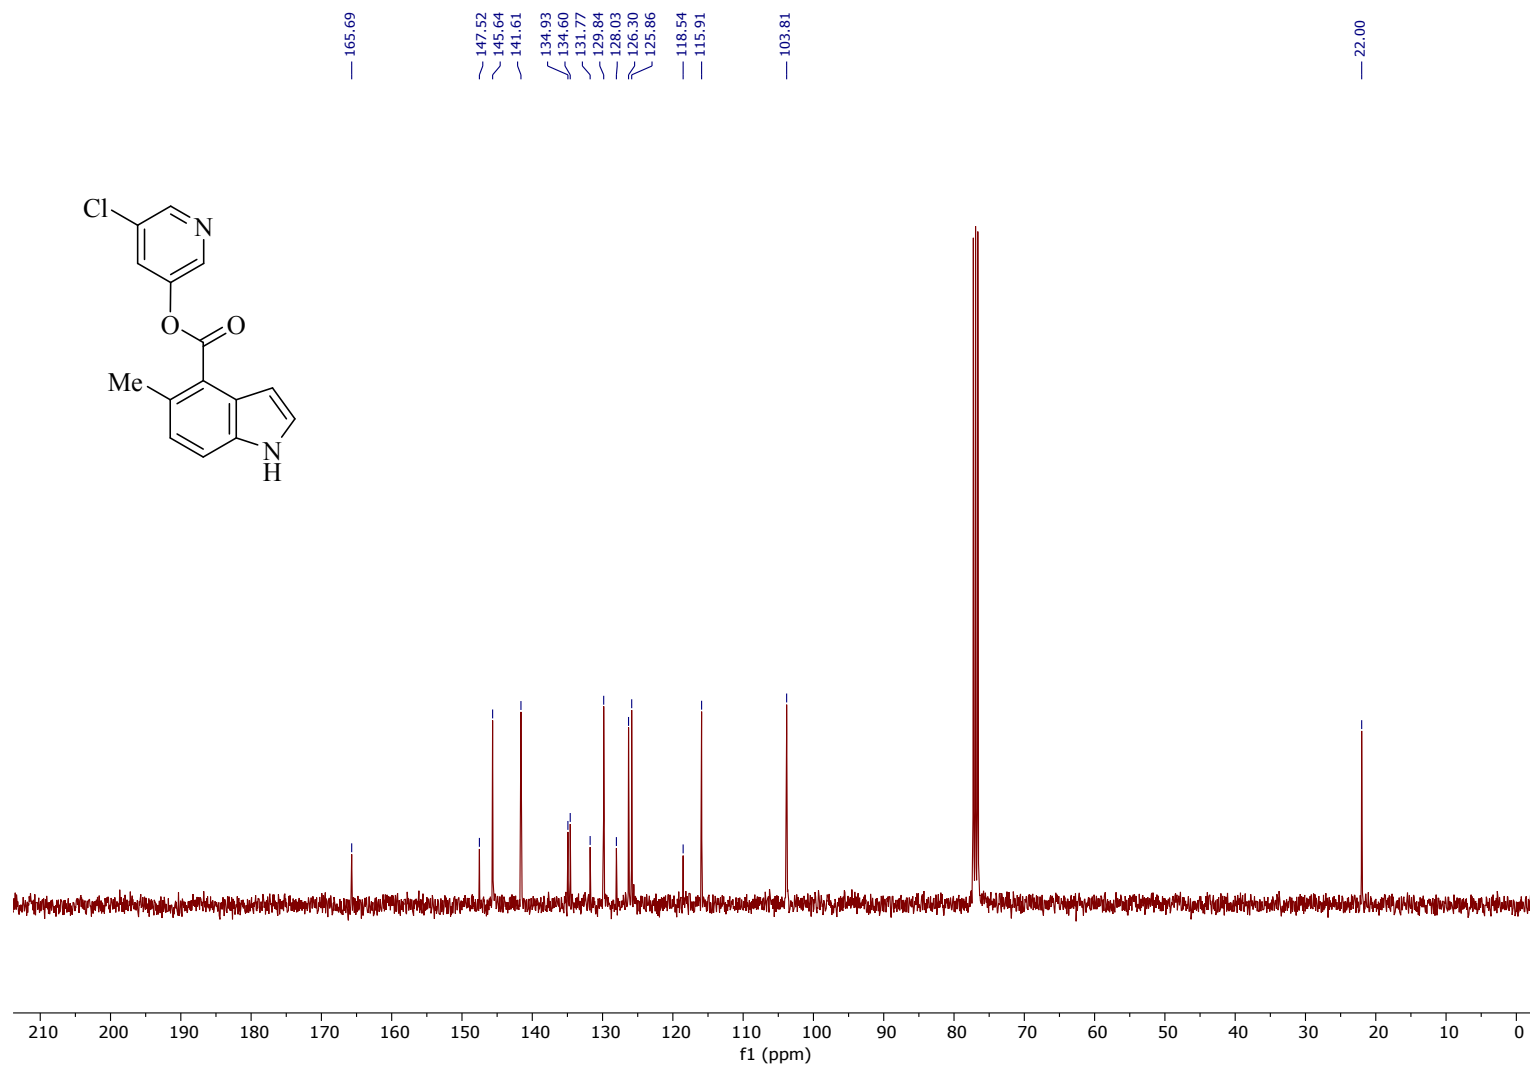

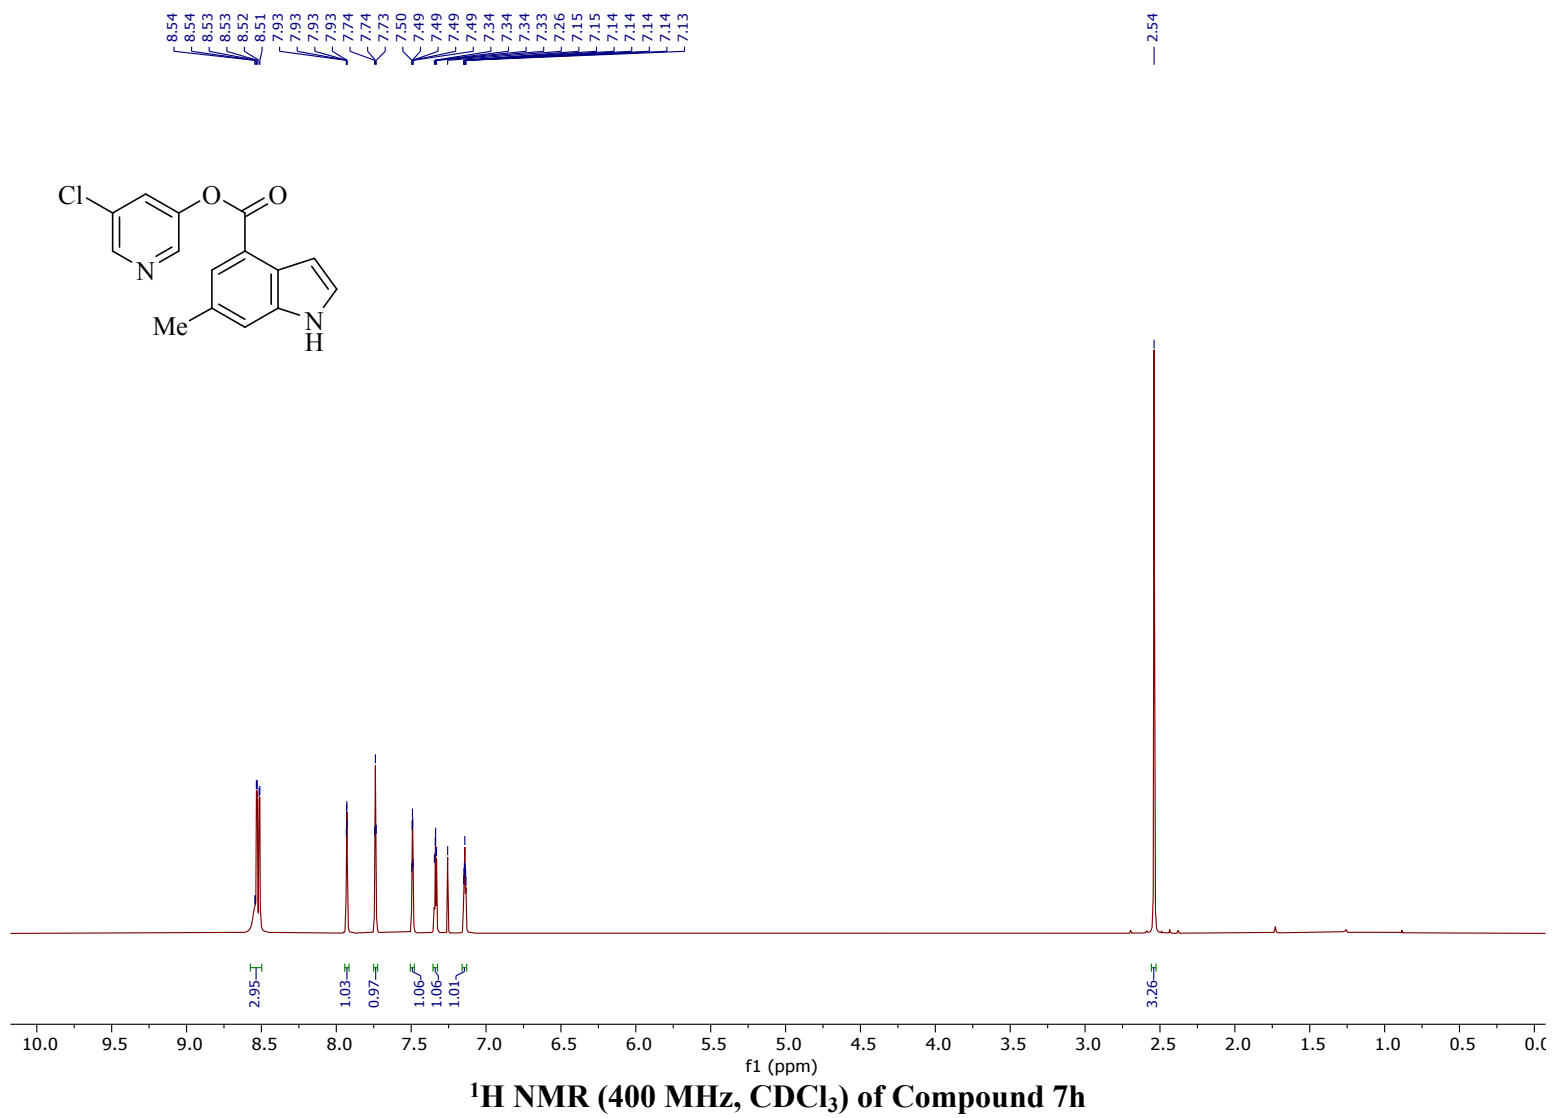

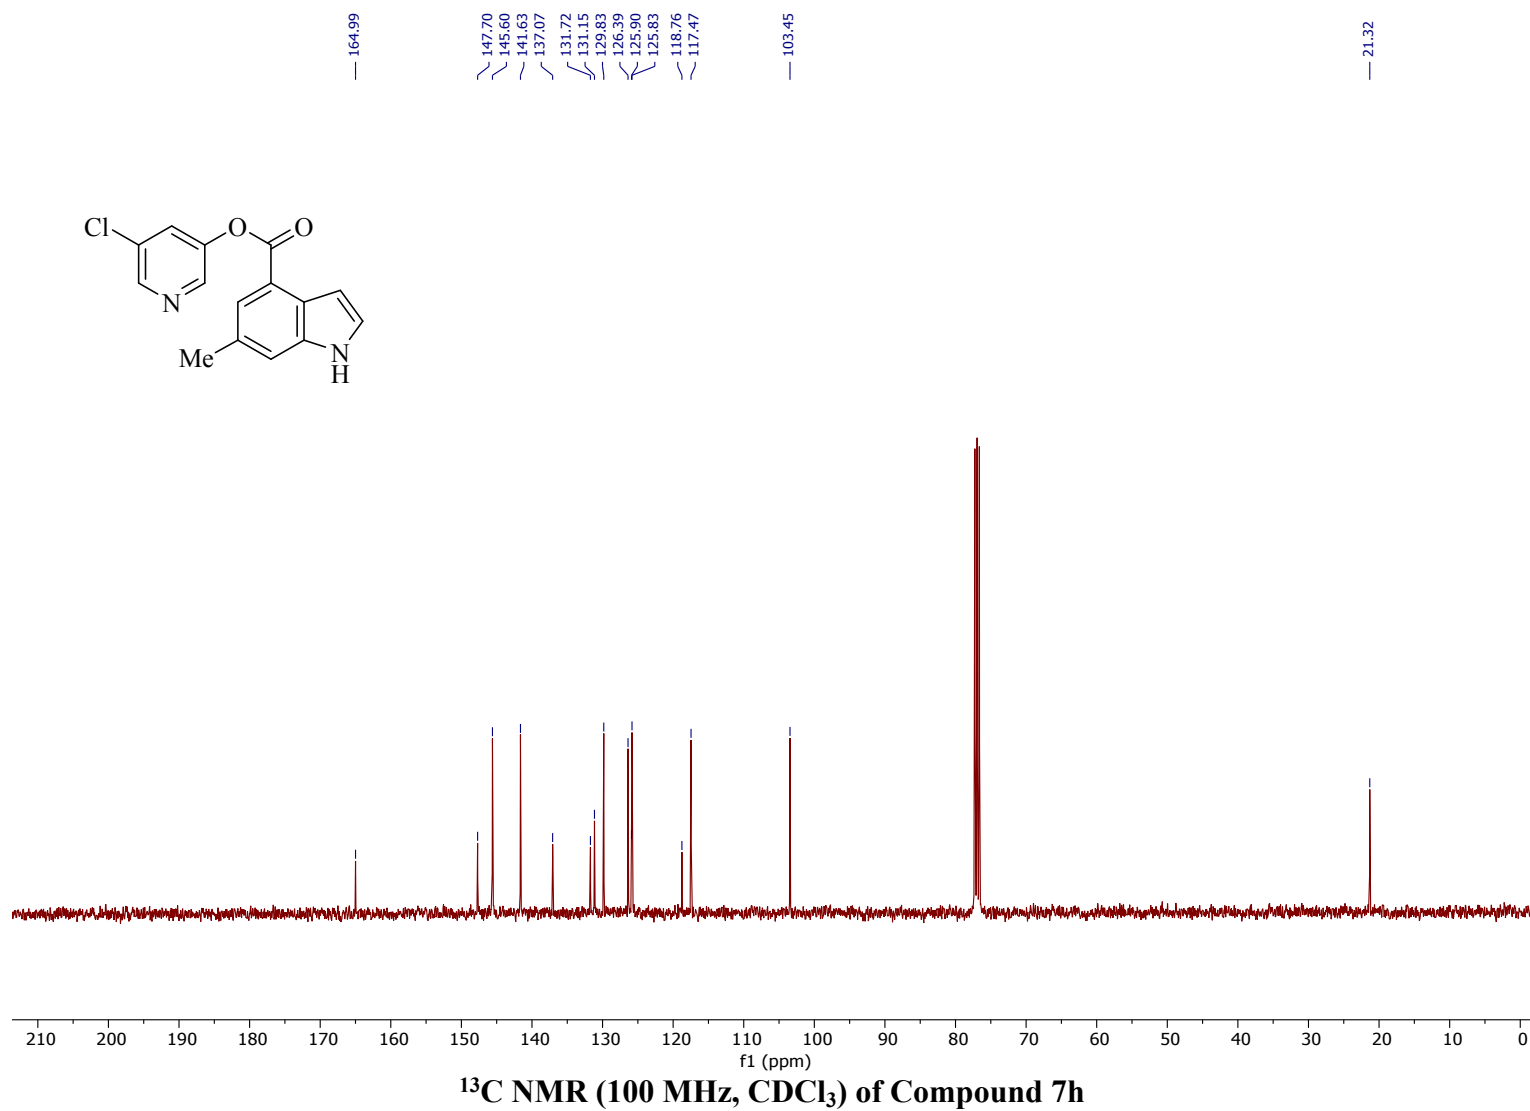



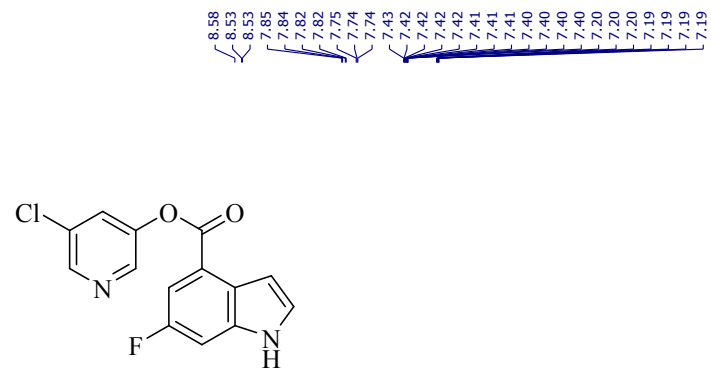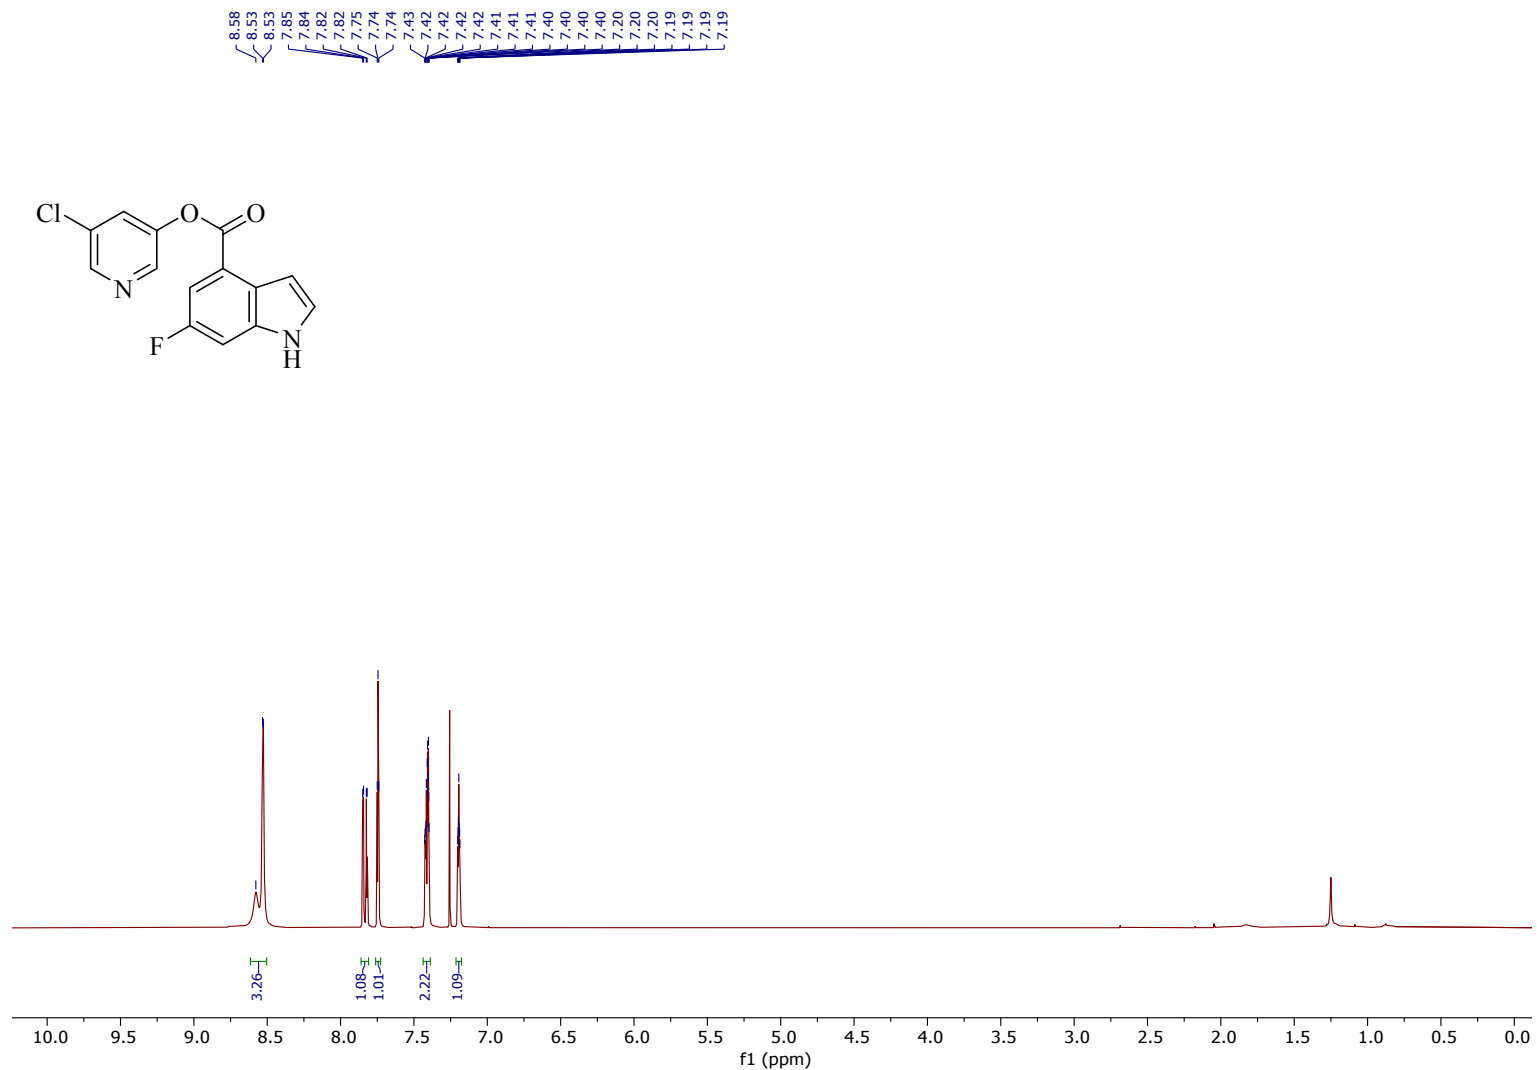

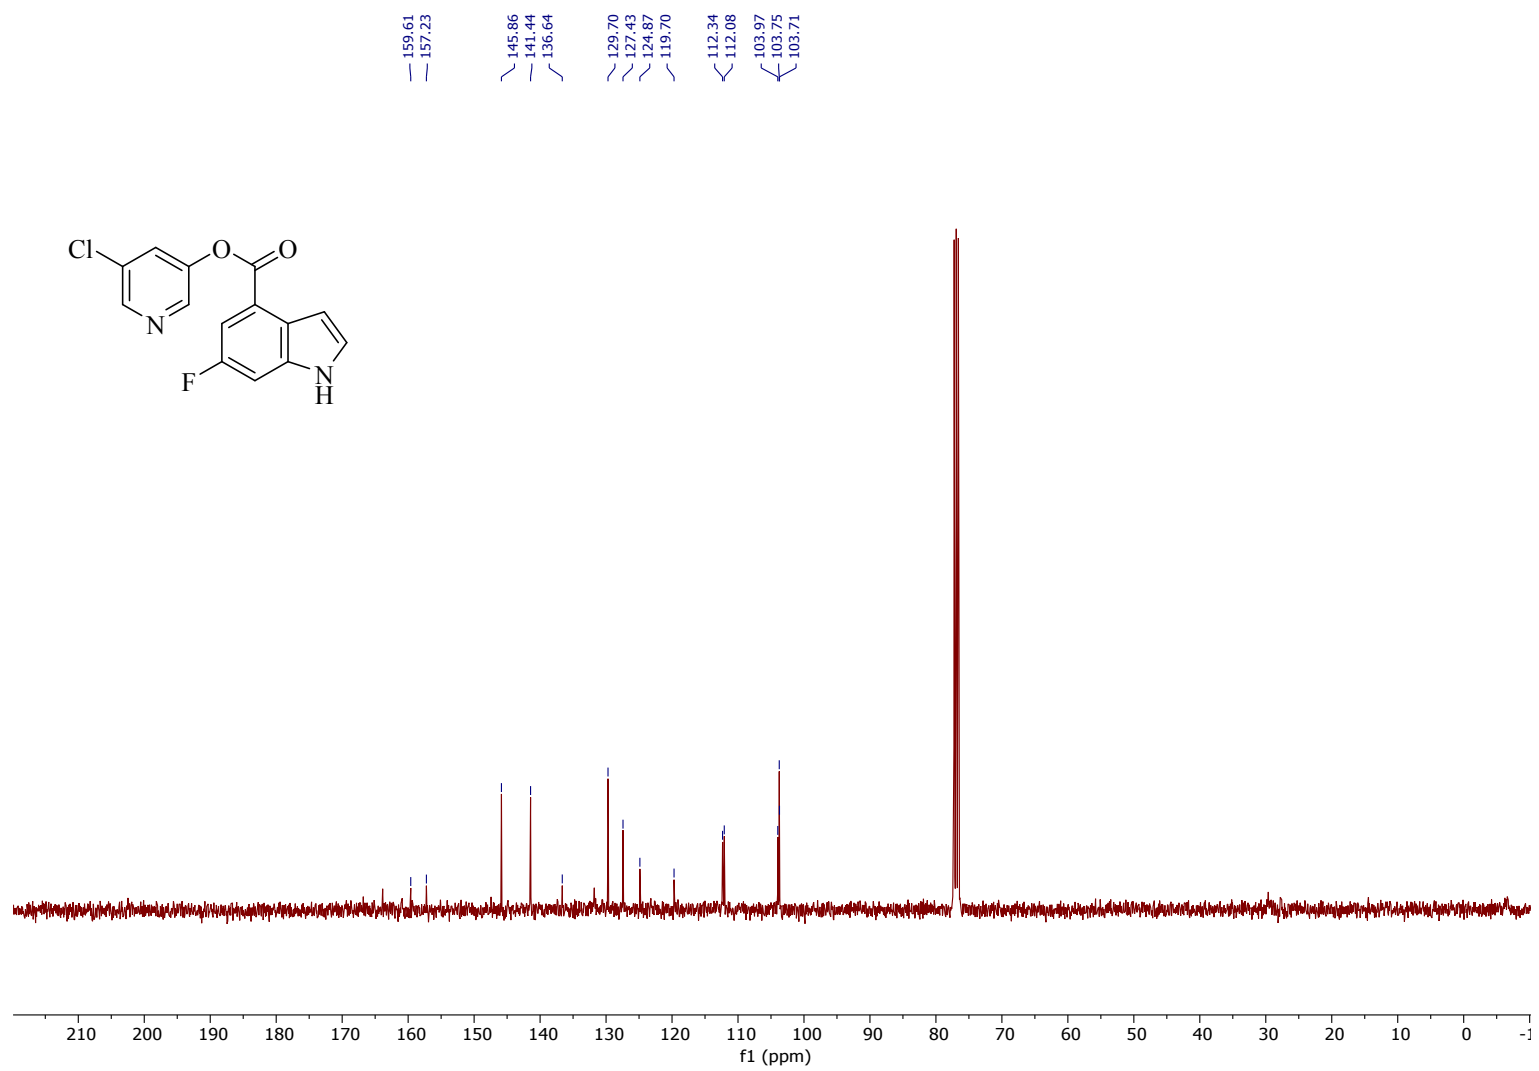

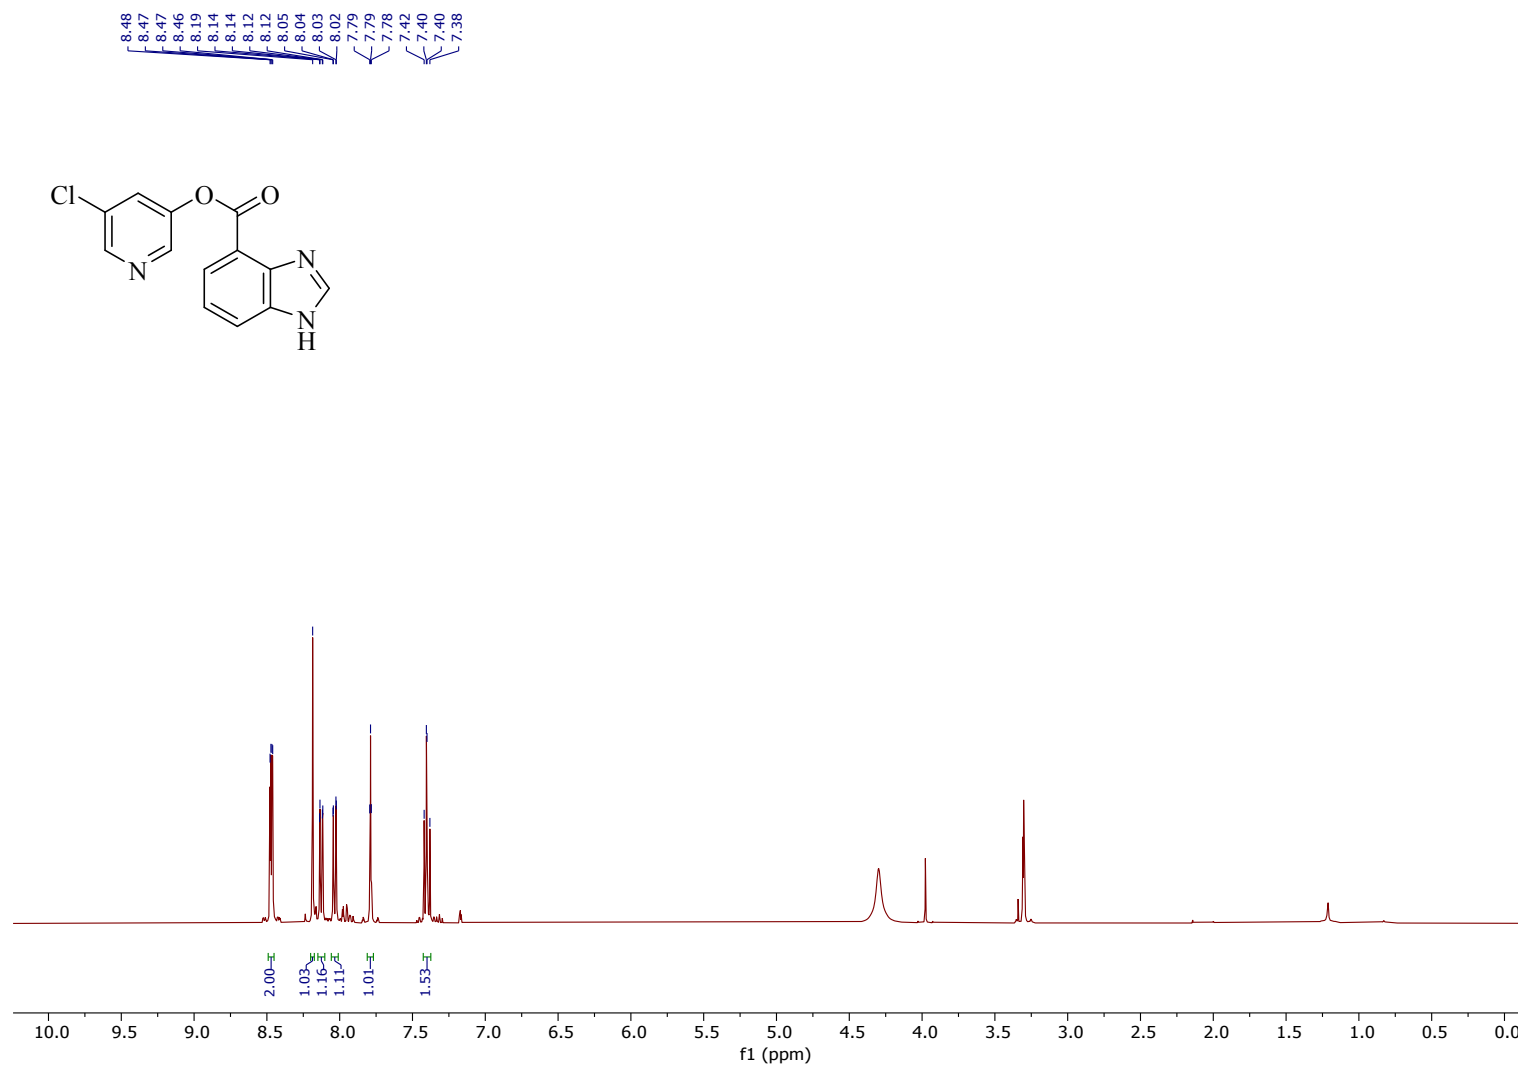

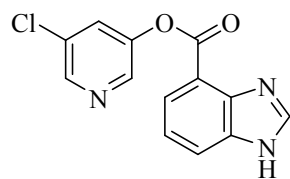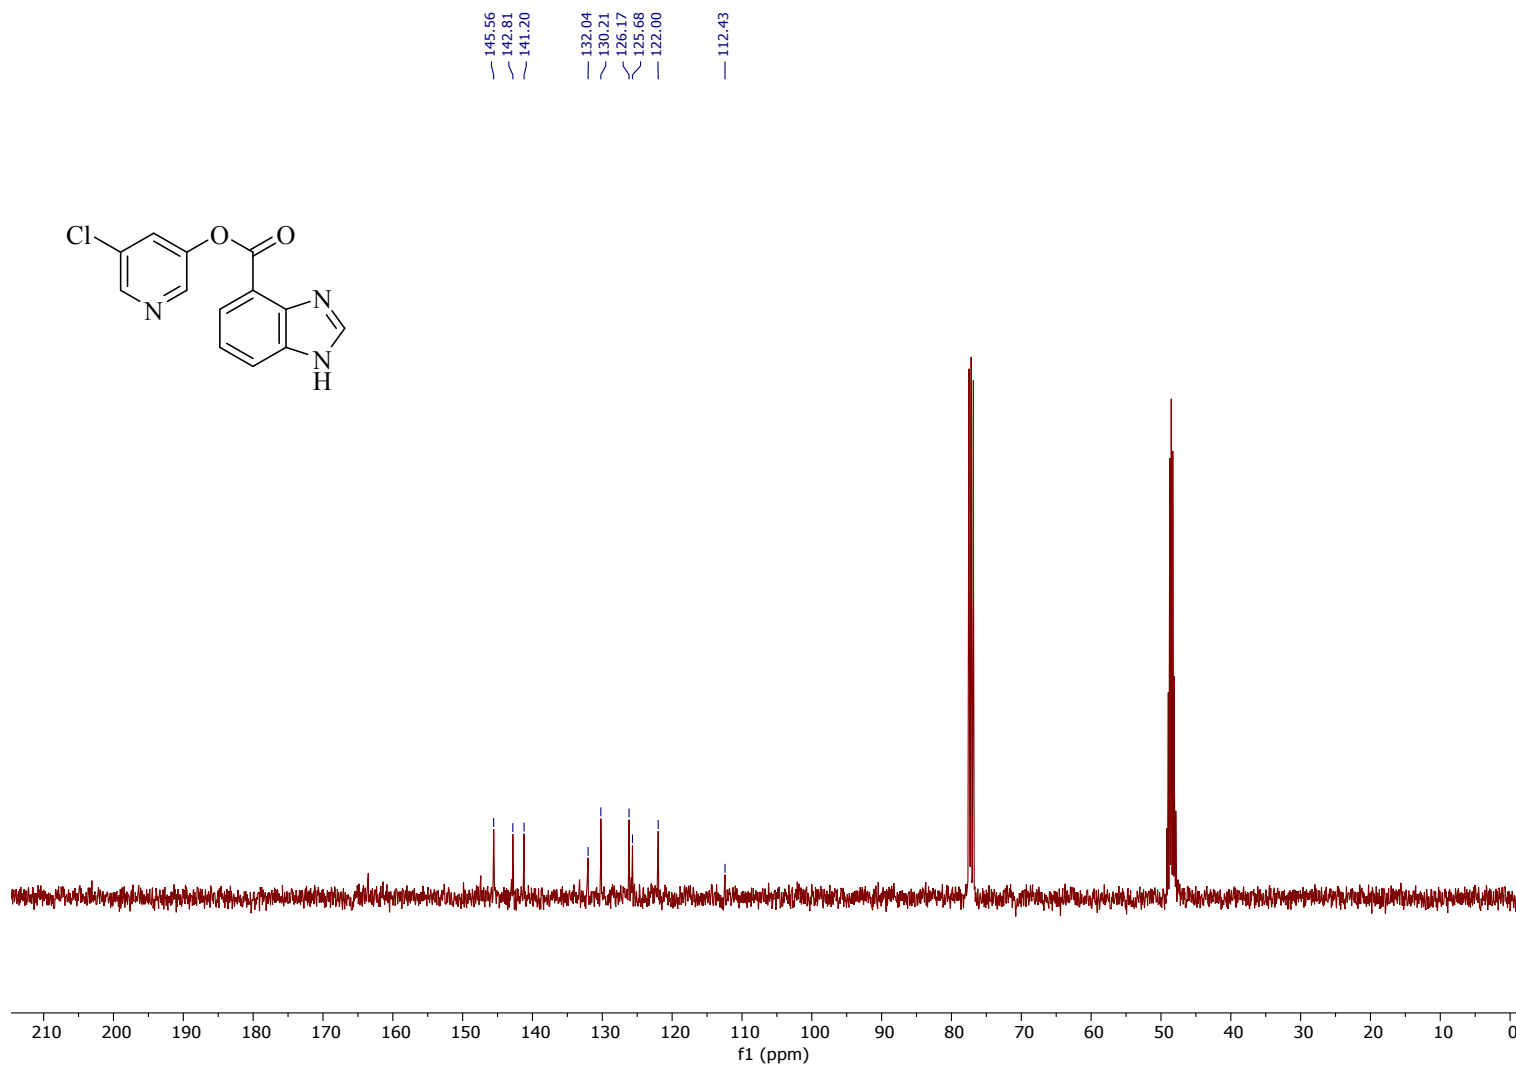

**<sup>13</sup>C NMR (100 MHz, MeOD) of Compound 7j**

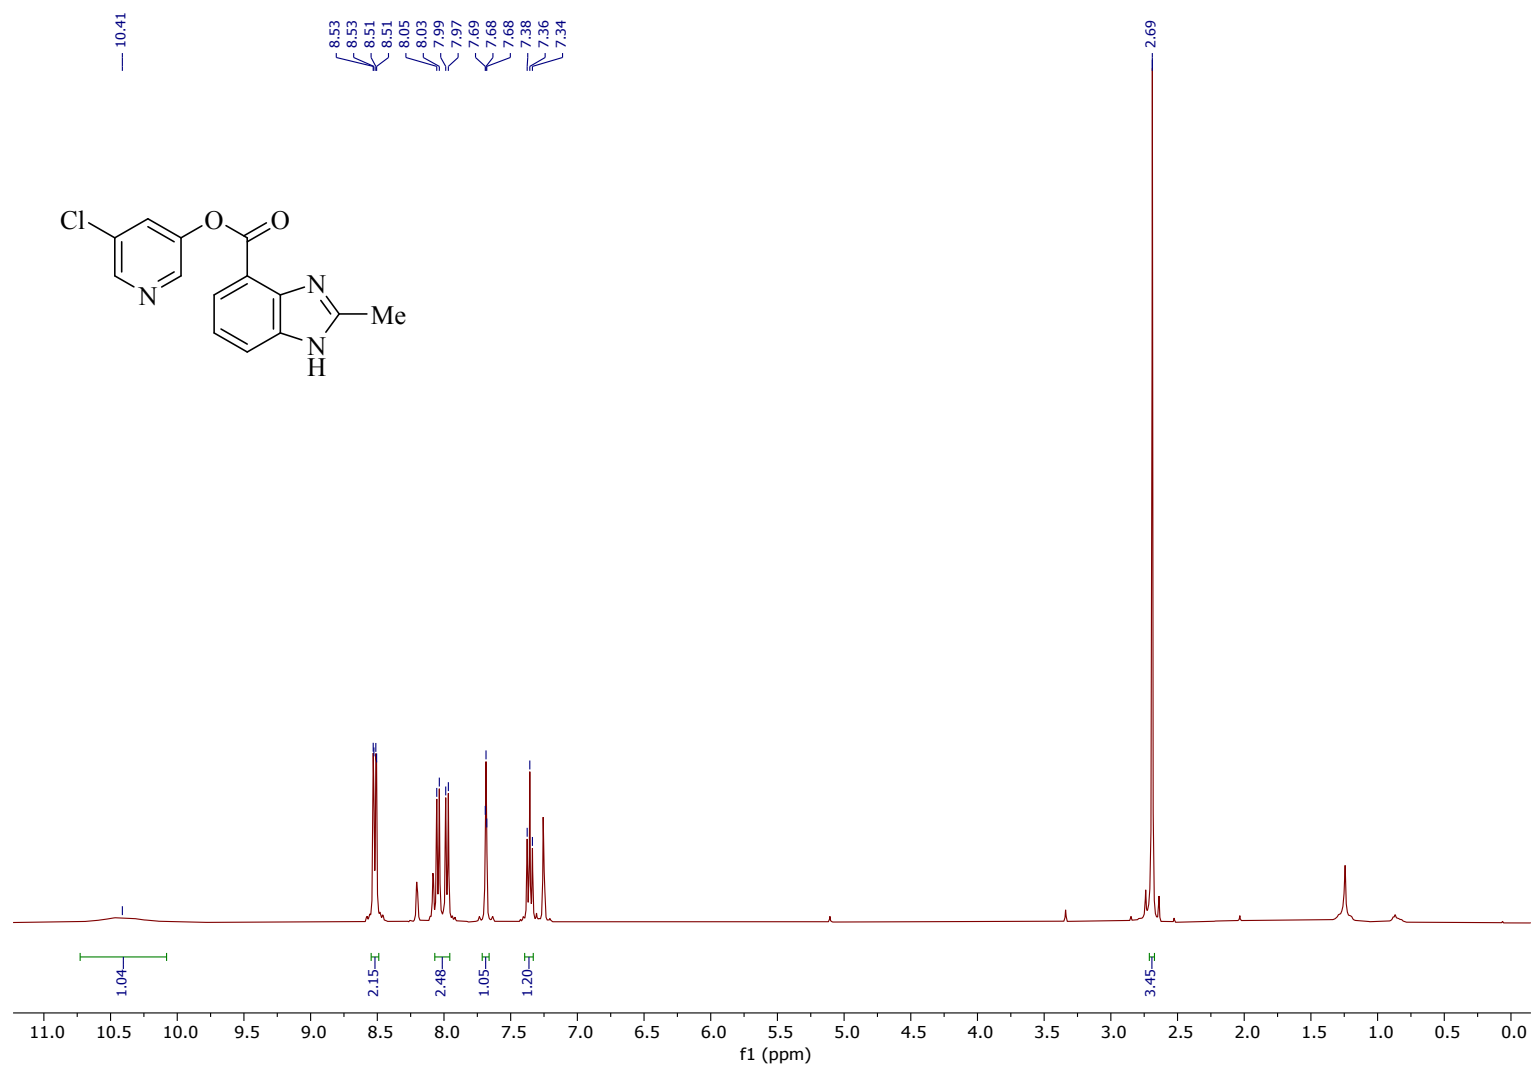

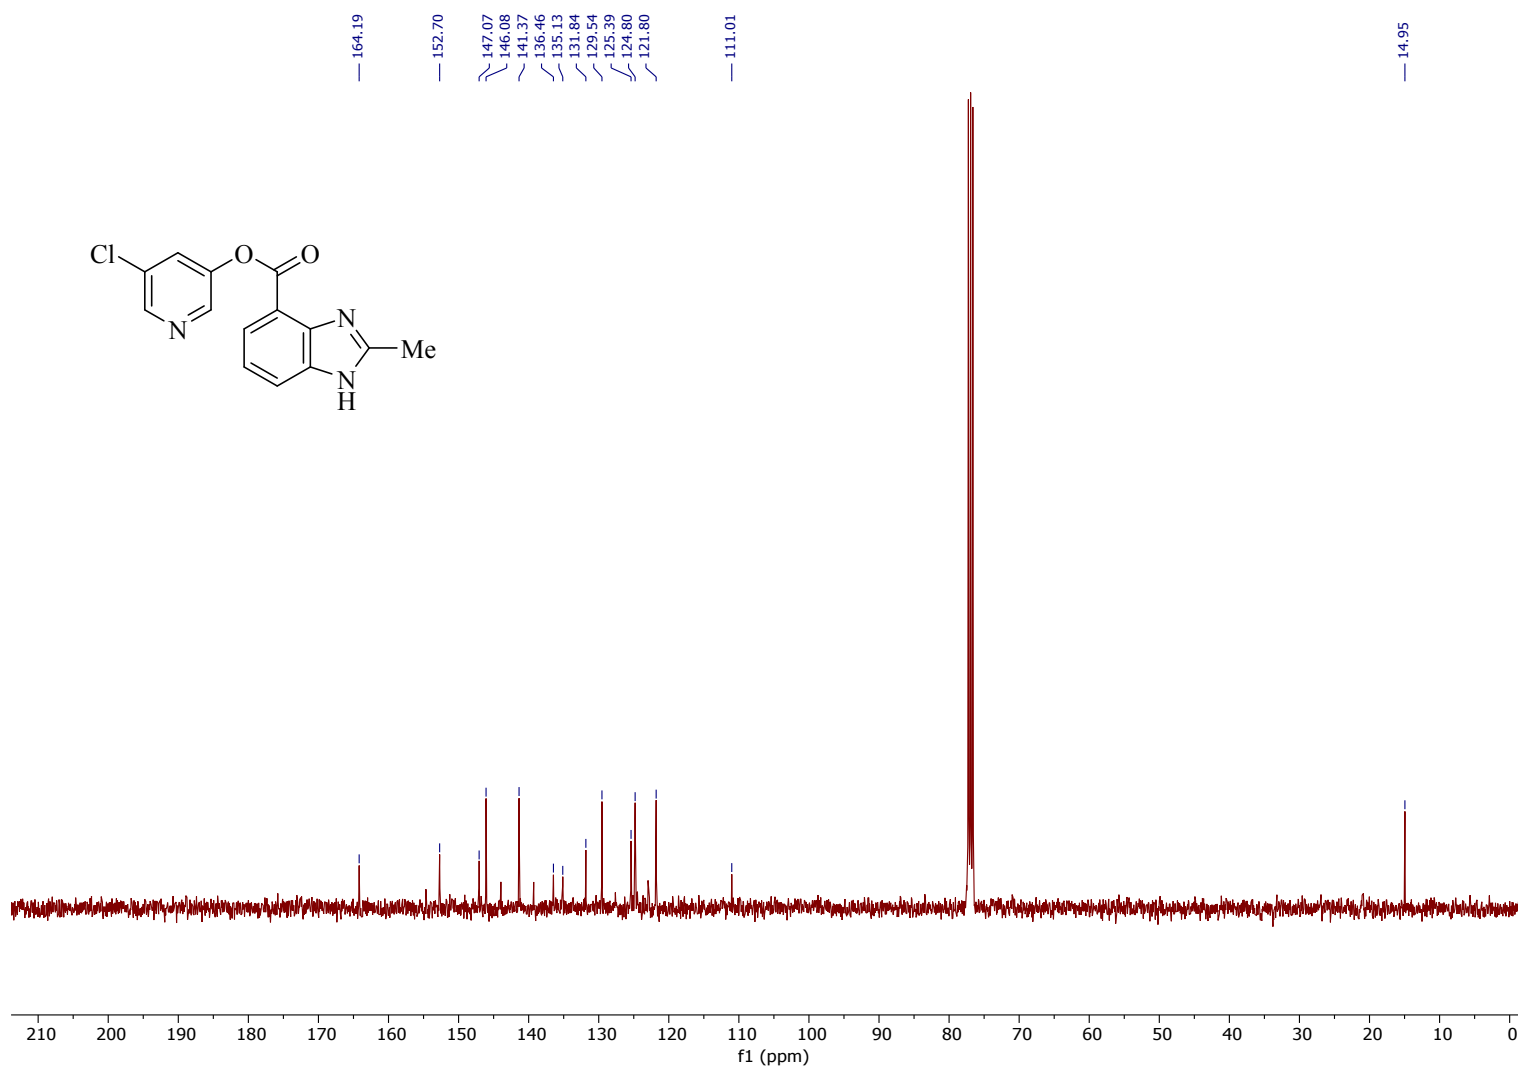

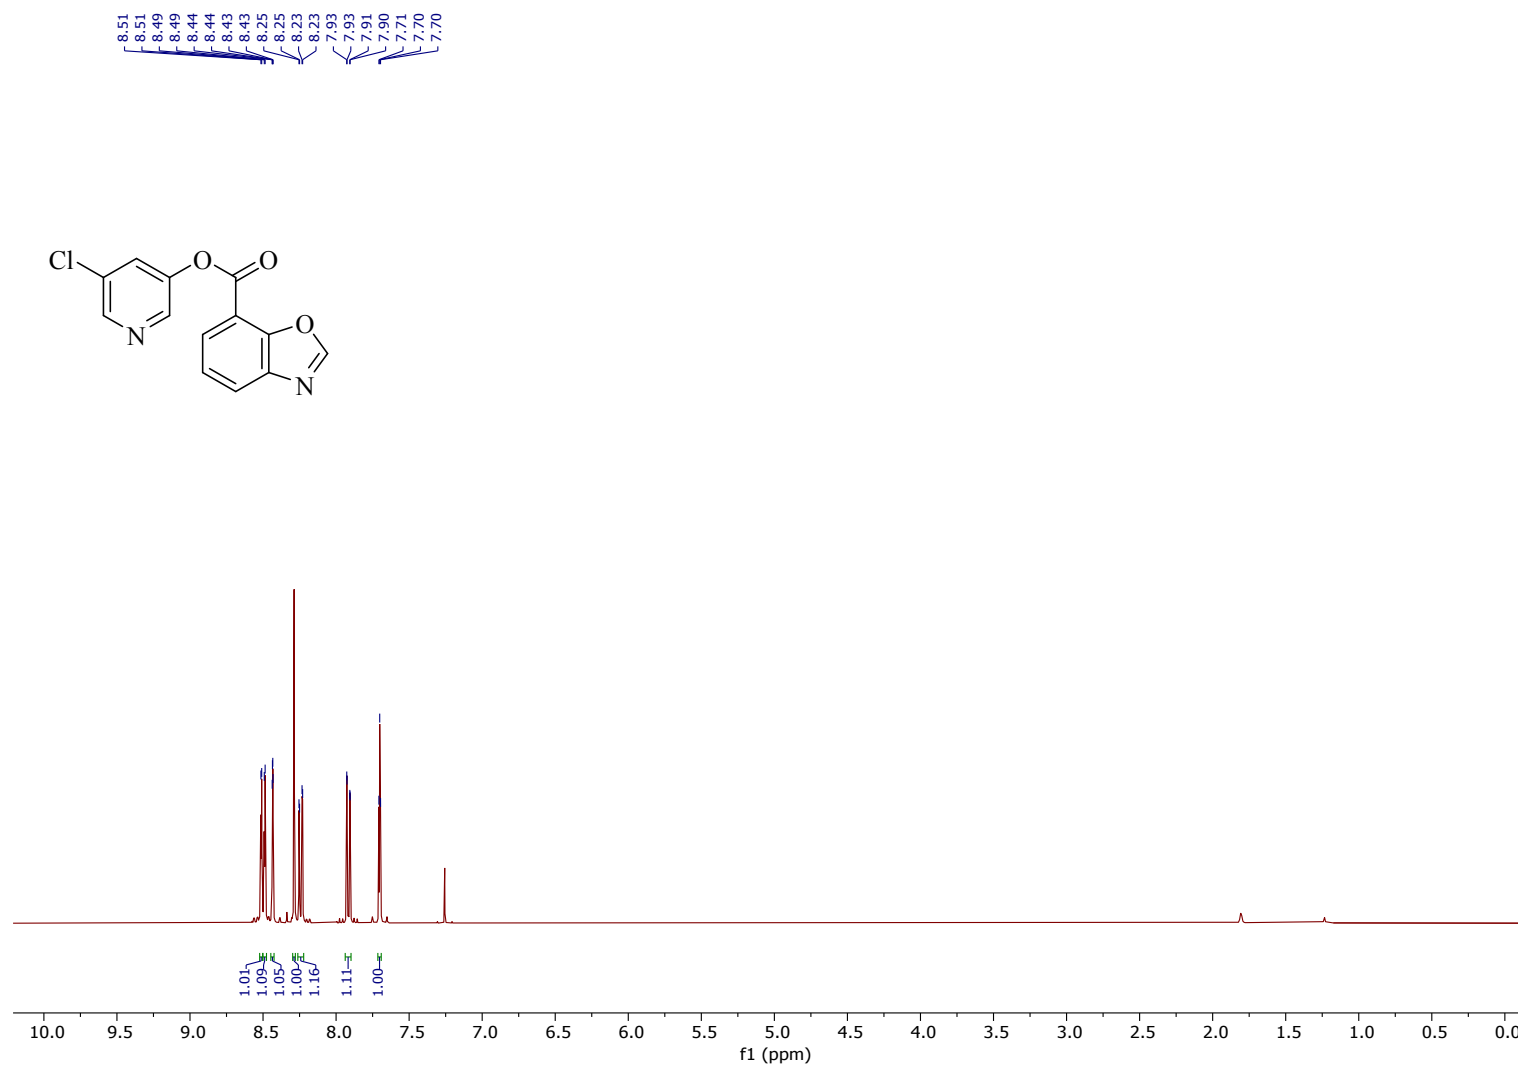

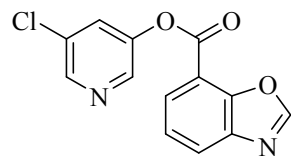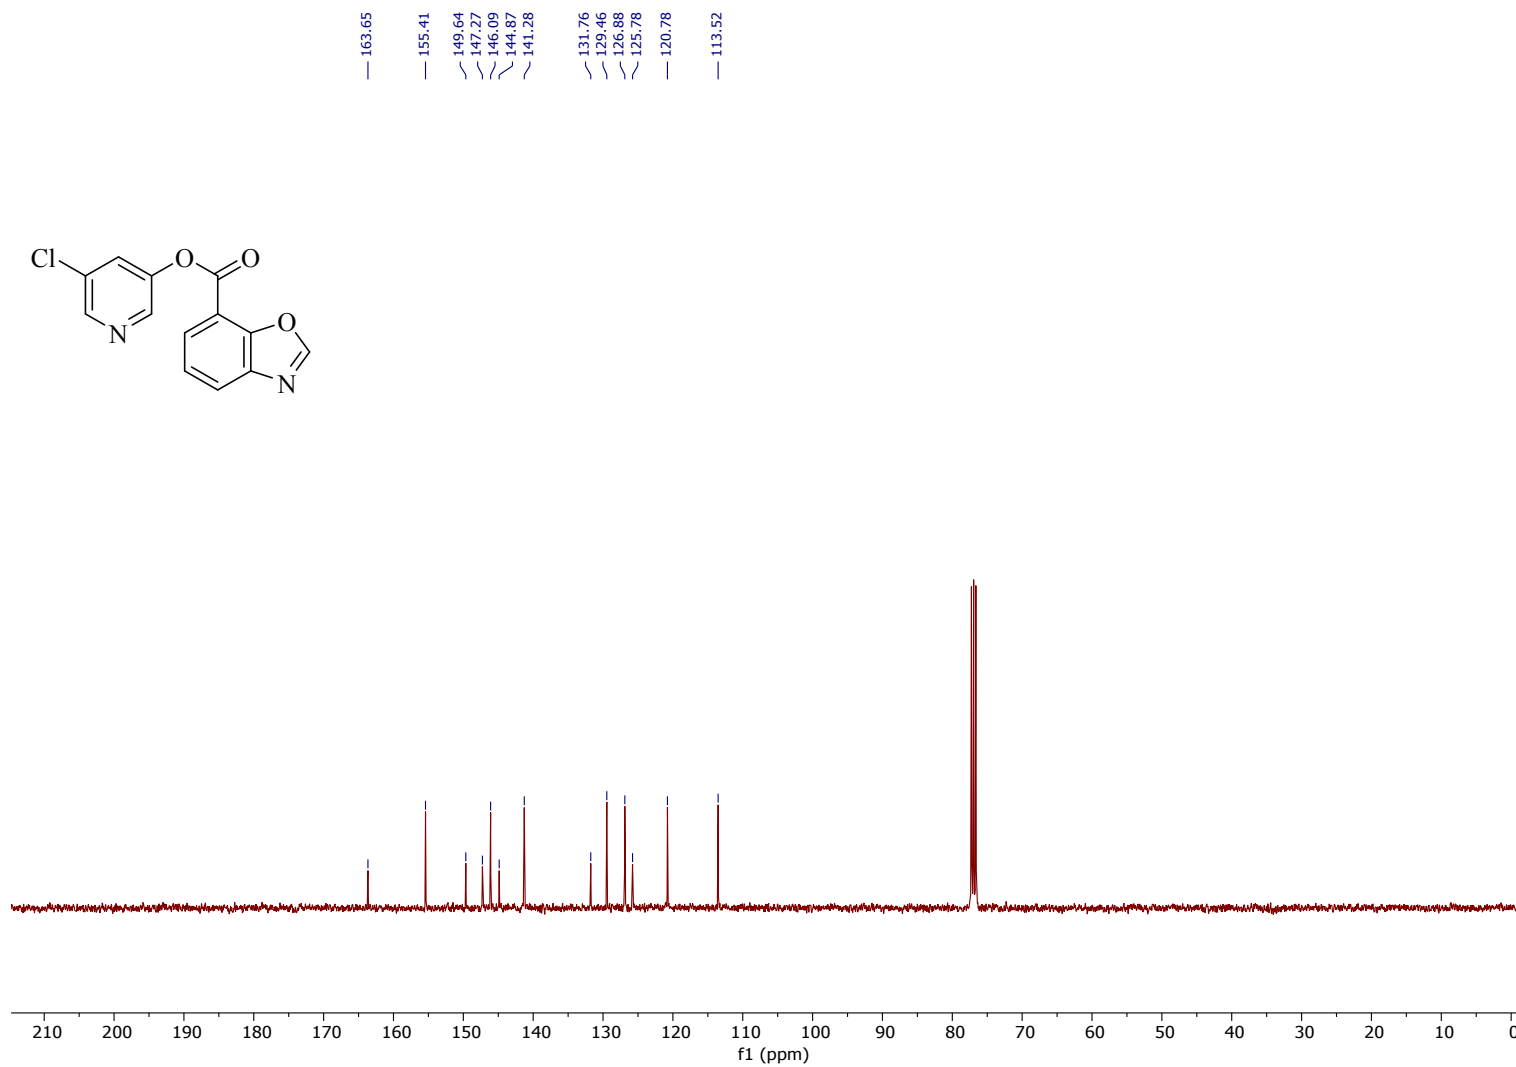

**<sup>13</sup>C NMR (100 MHz, CDCl<sub>3</sub>) of Compound 71**



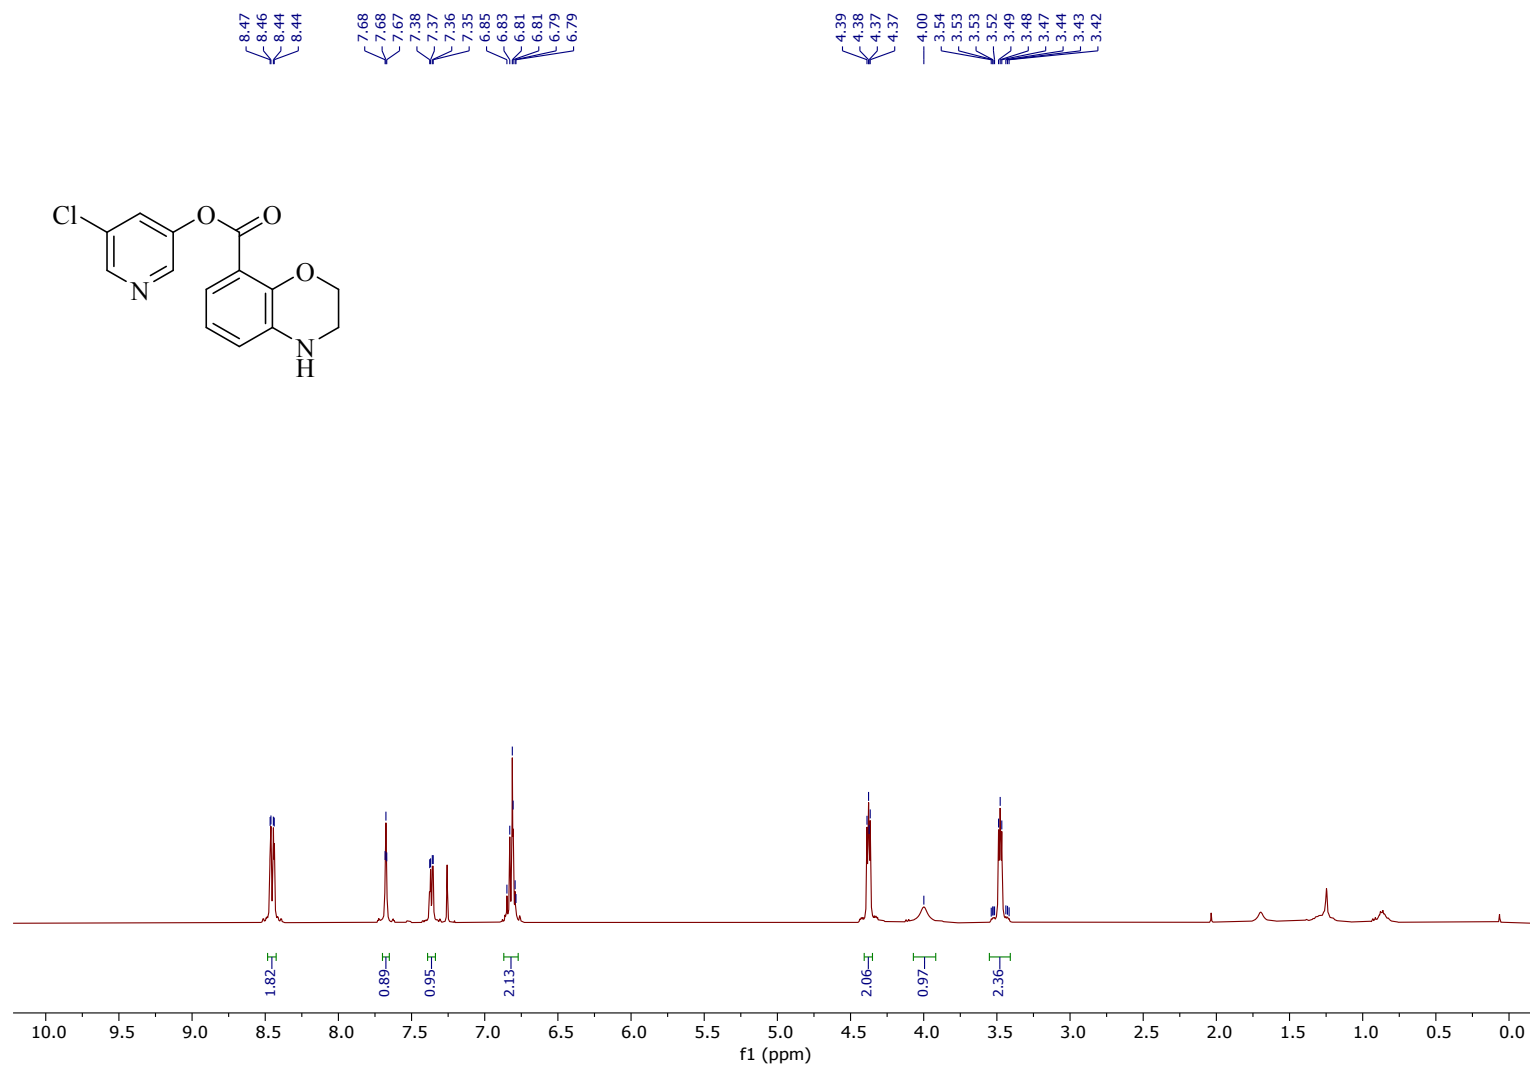

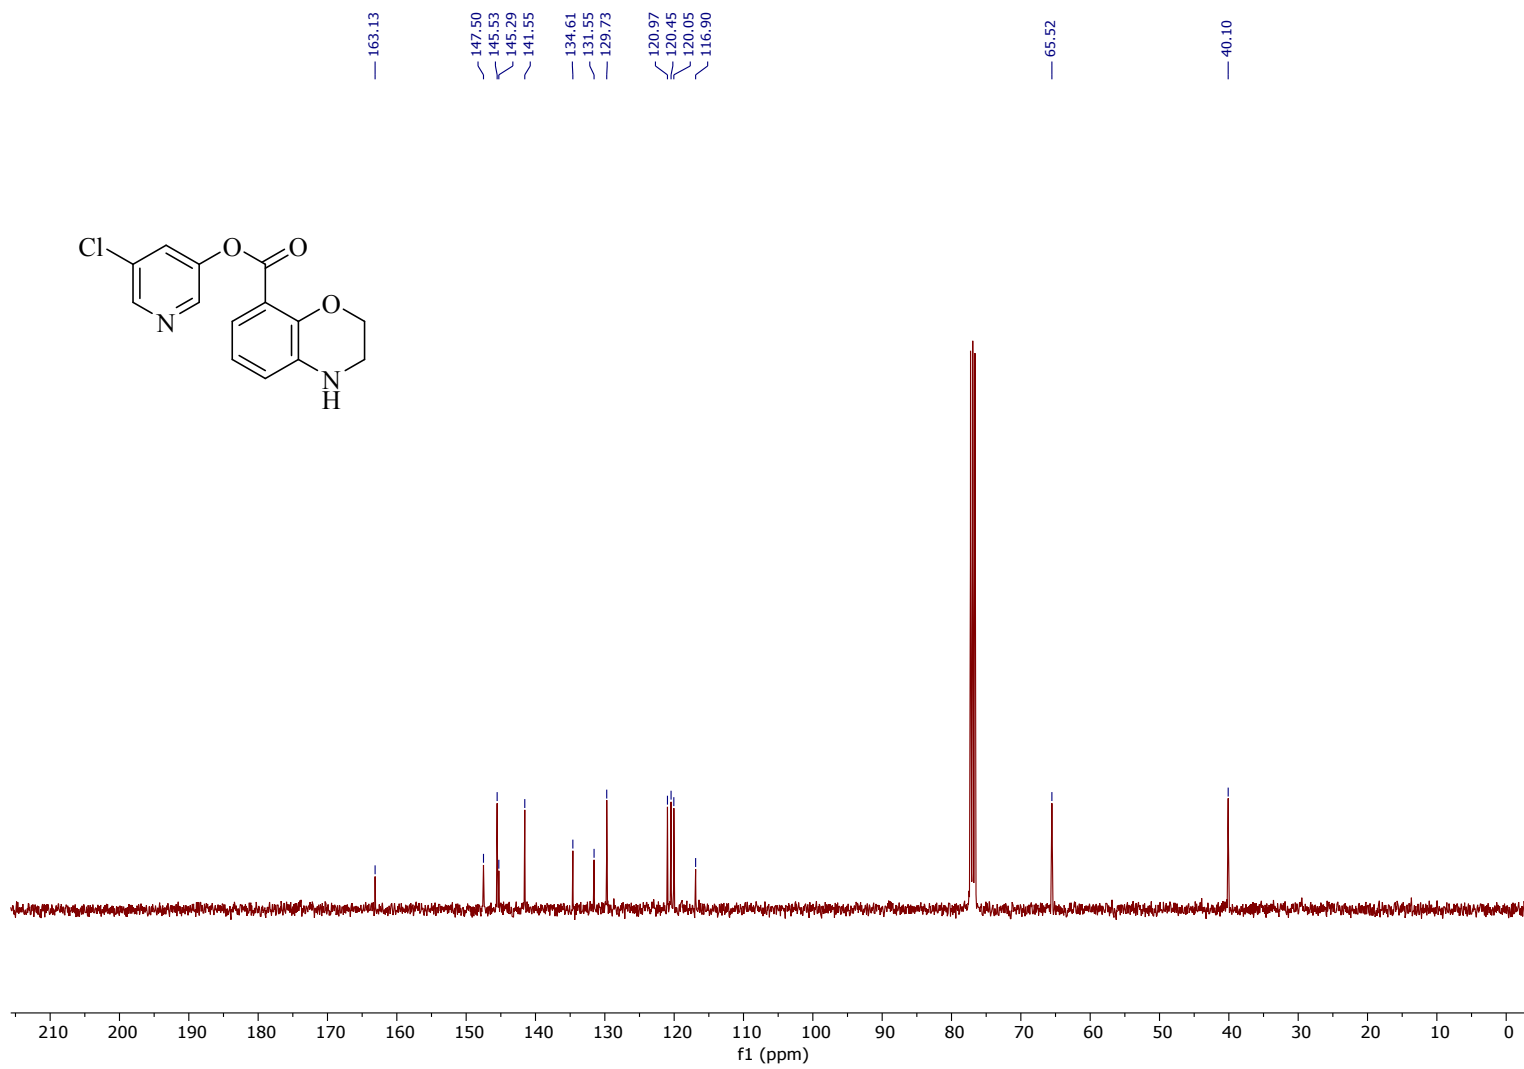

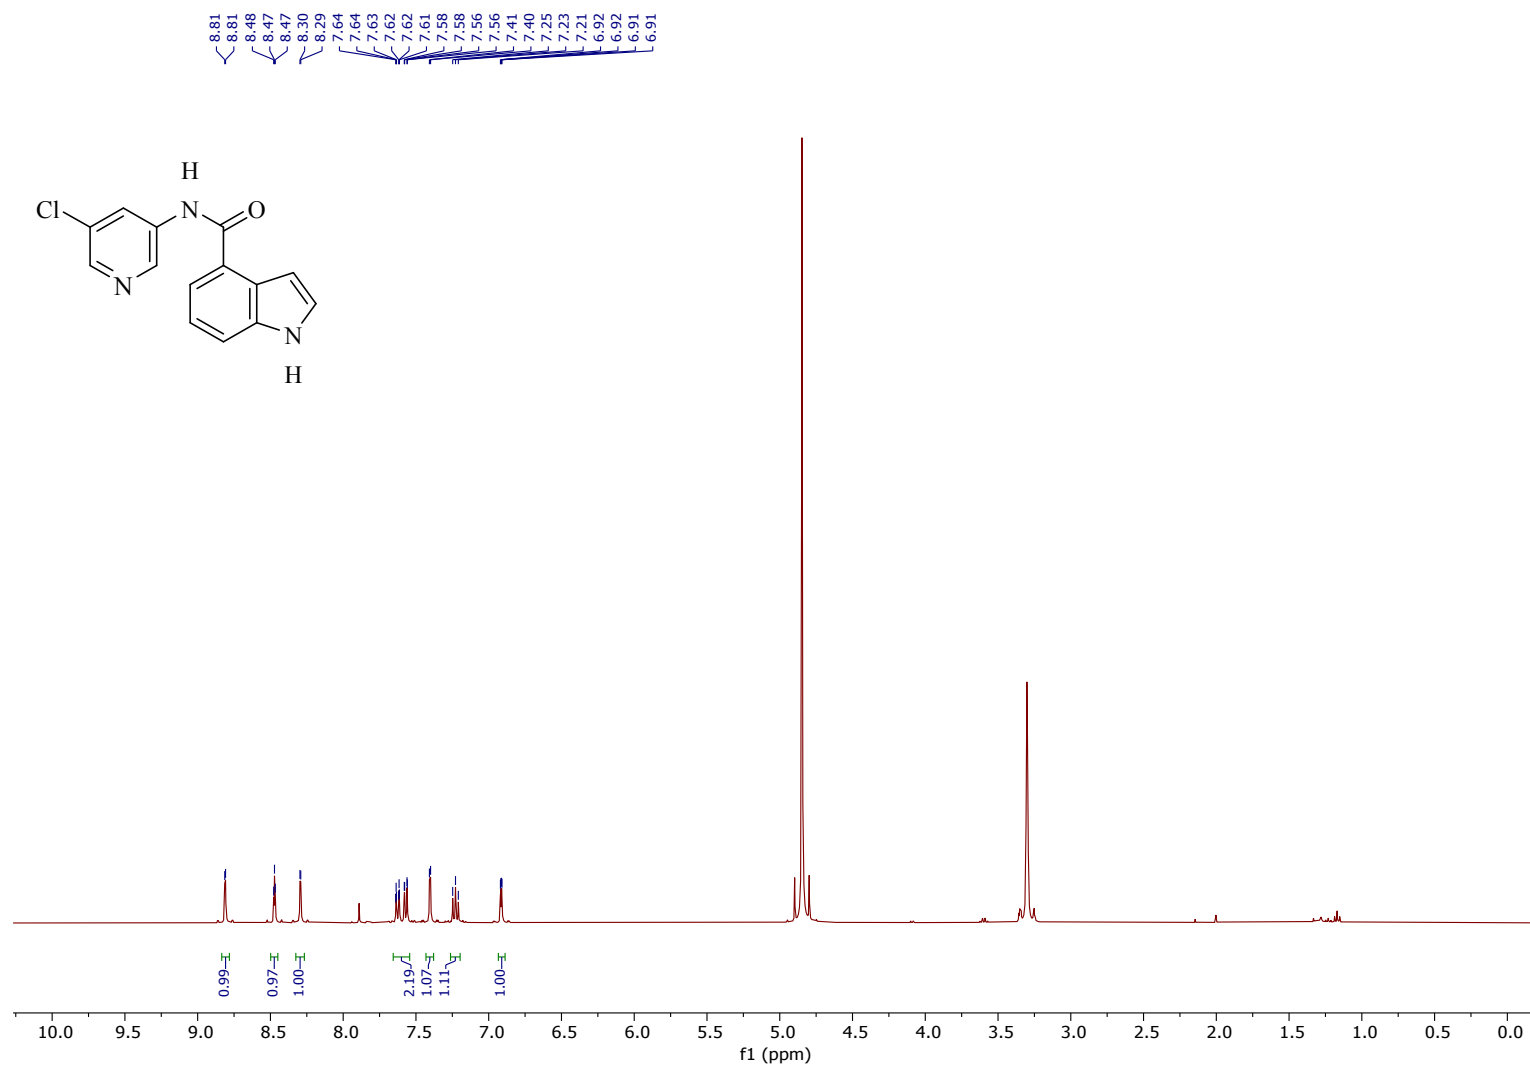

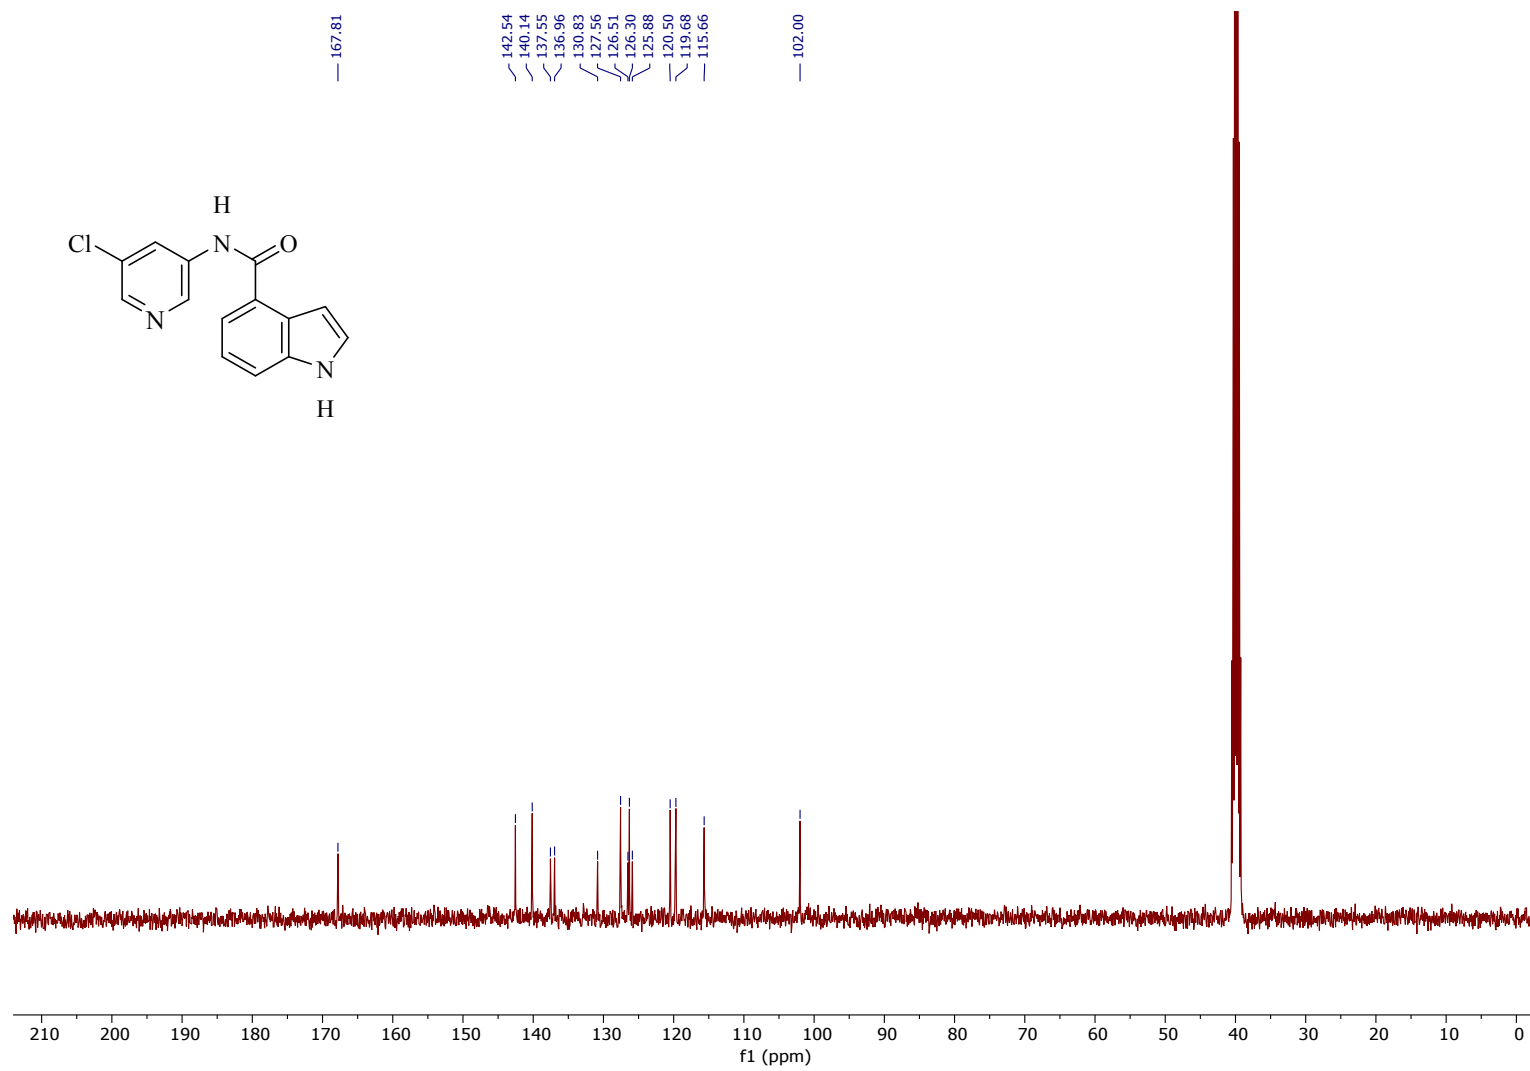

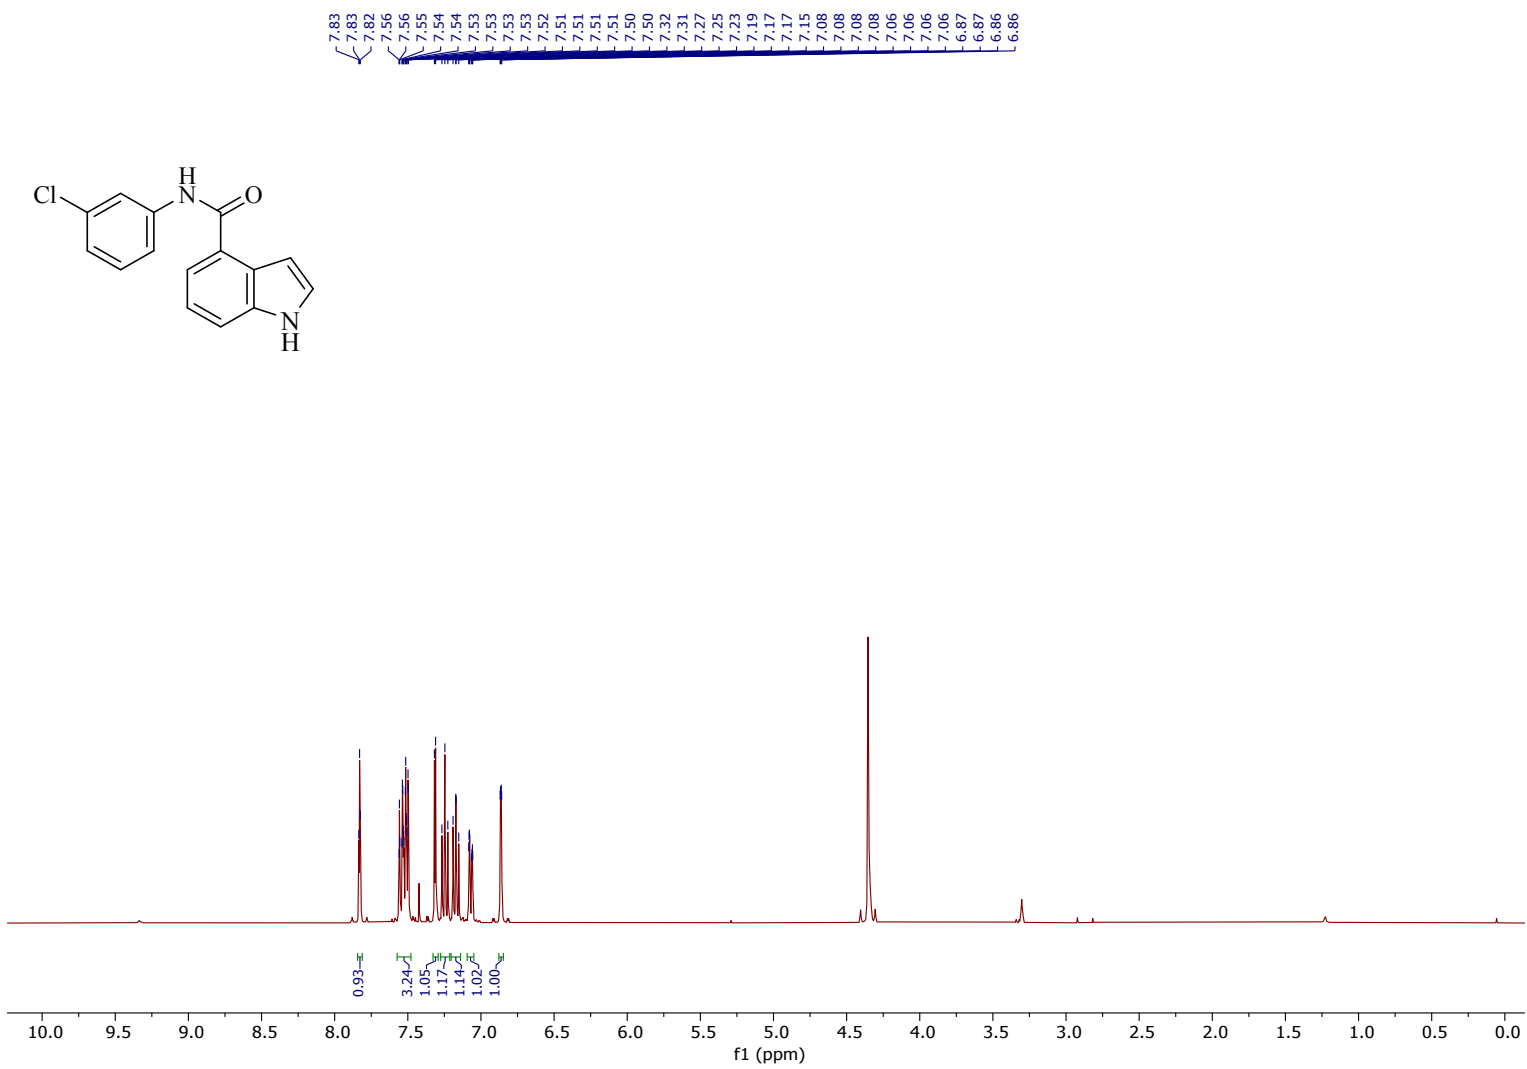

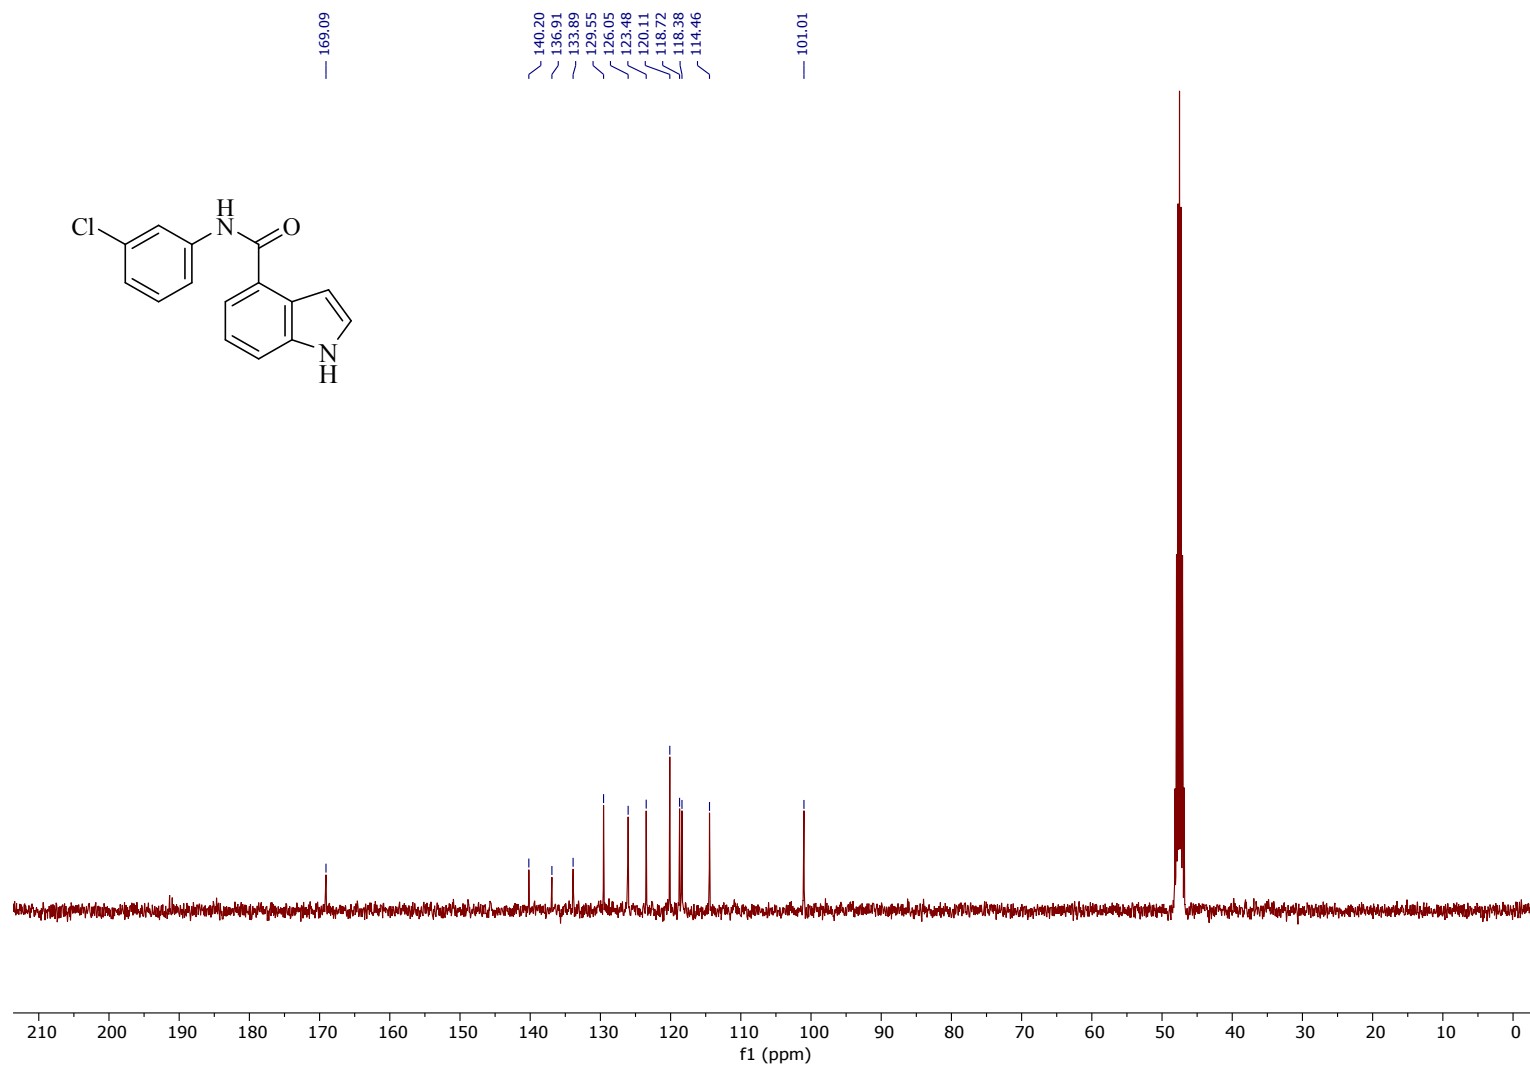

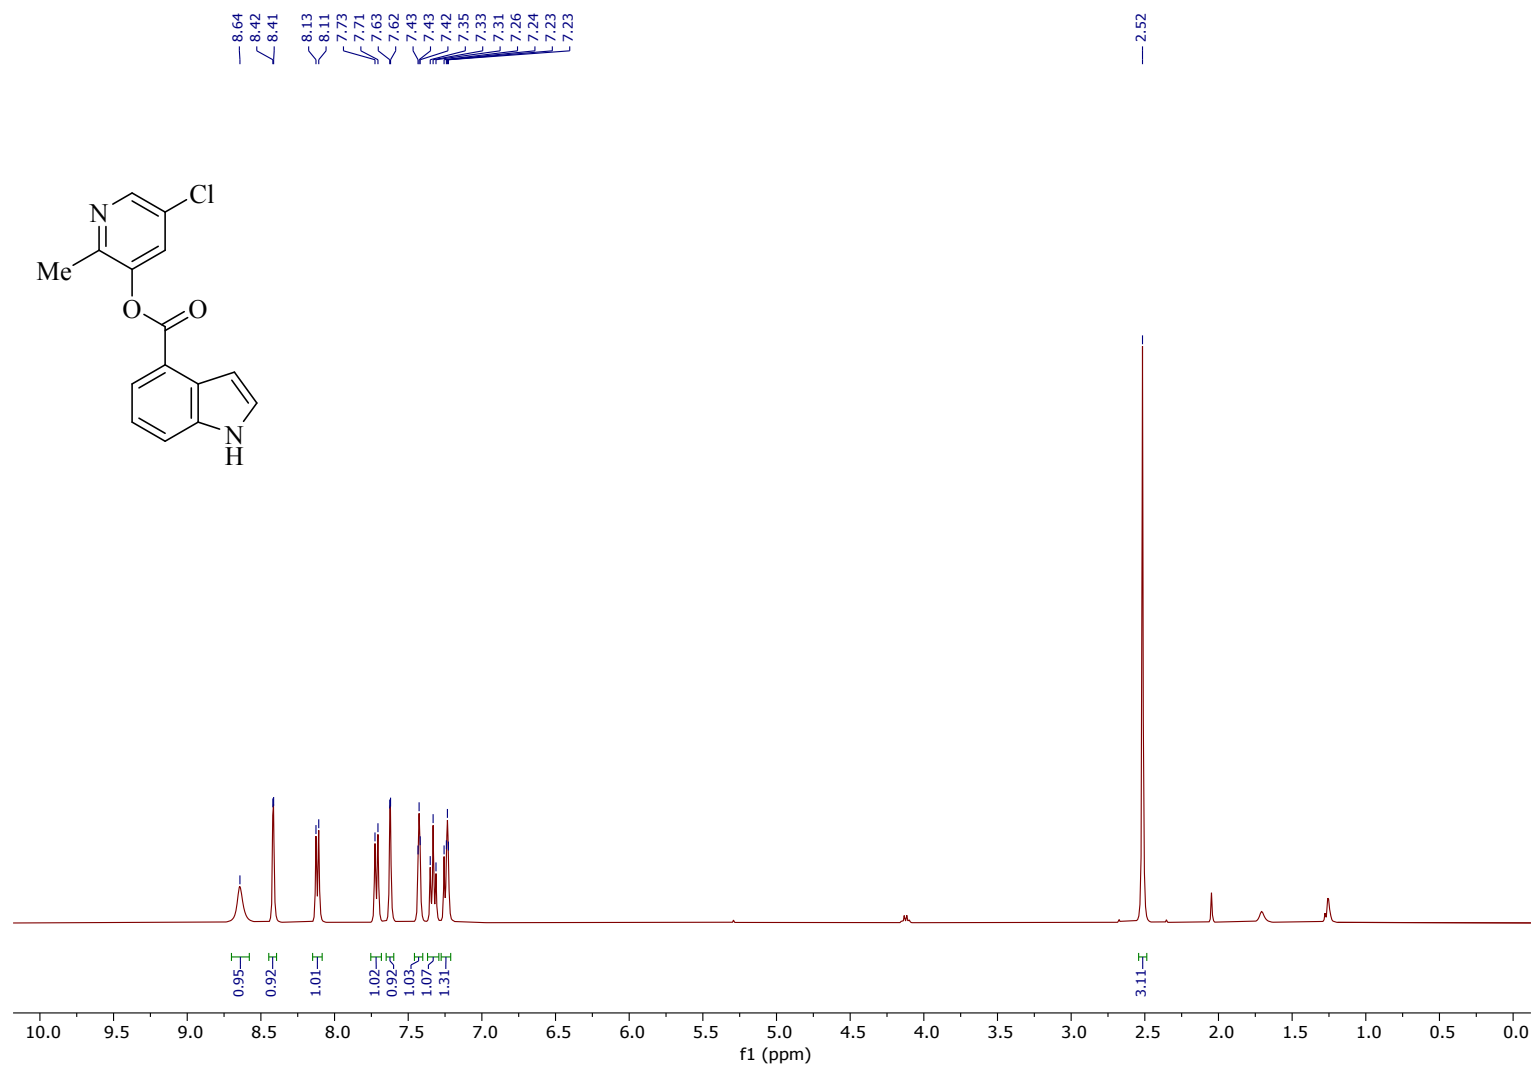

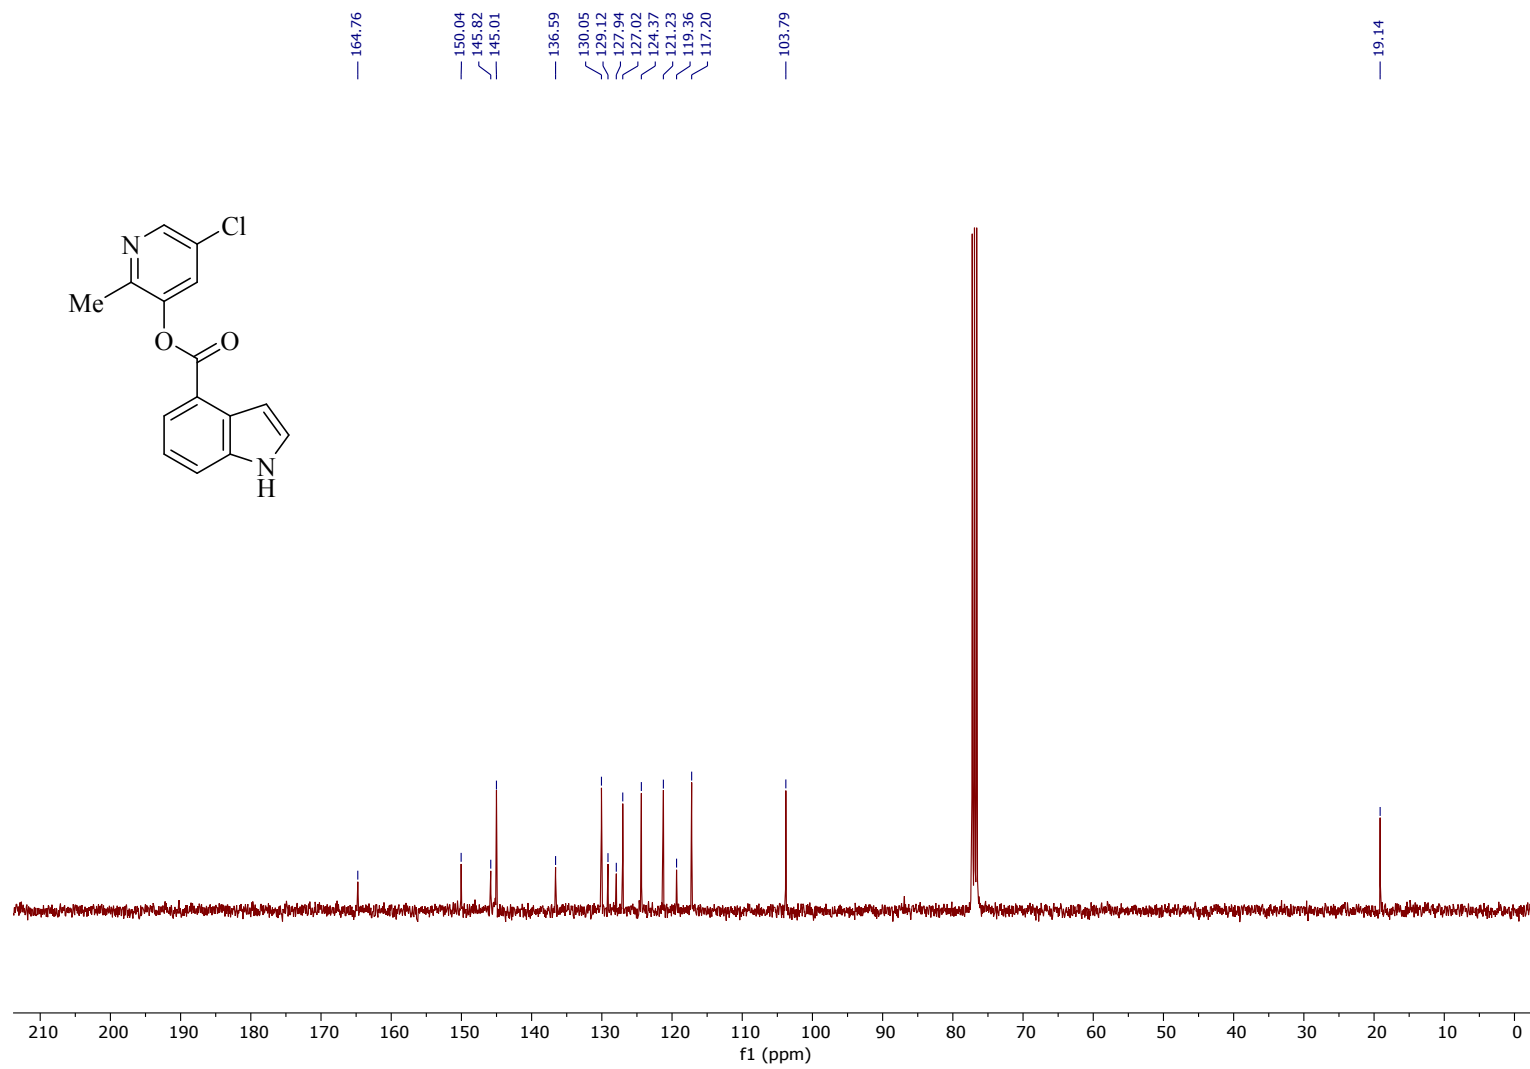



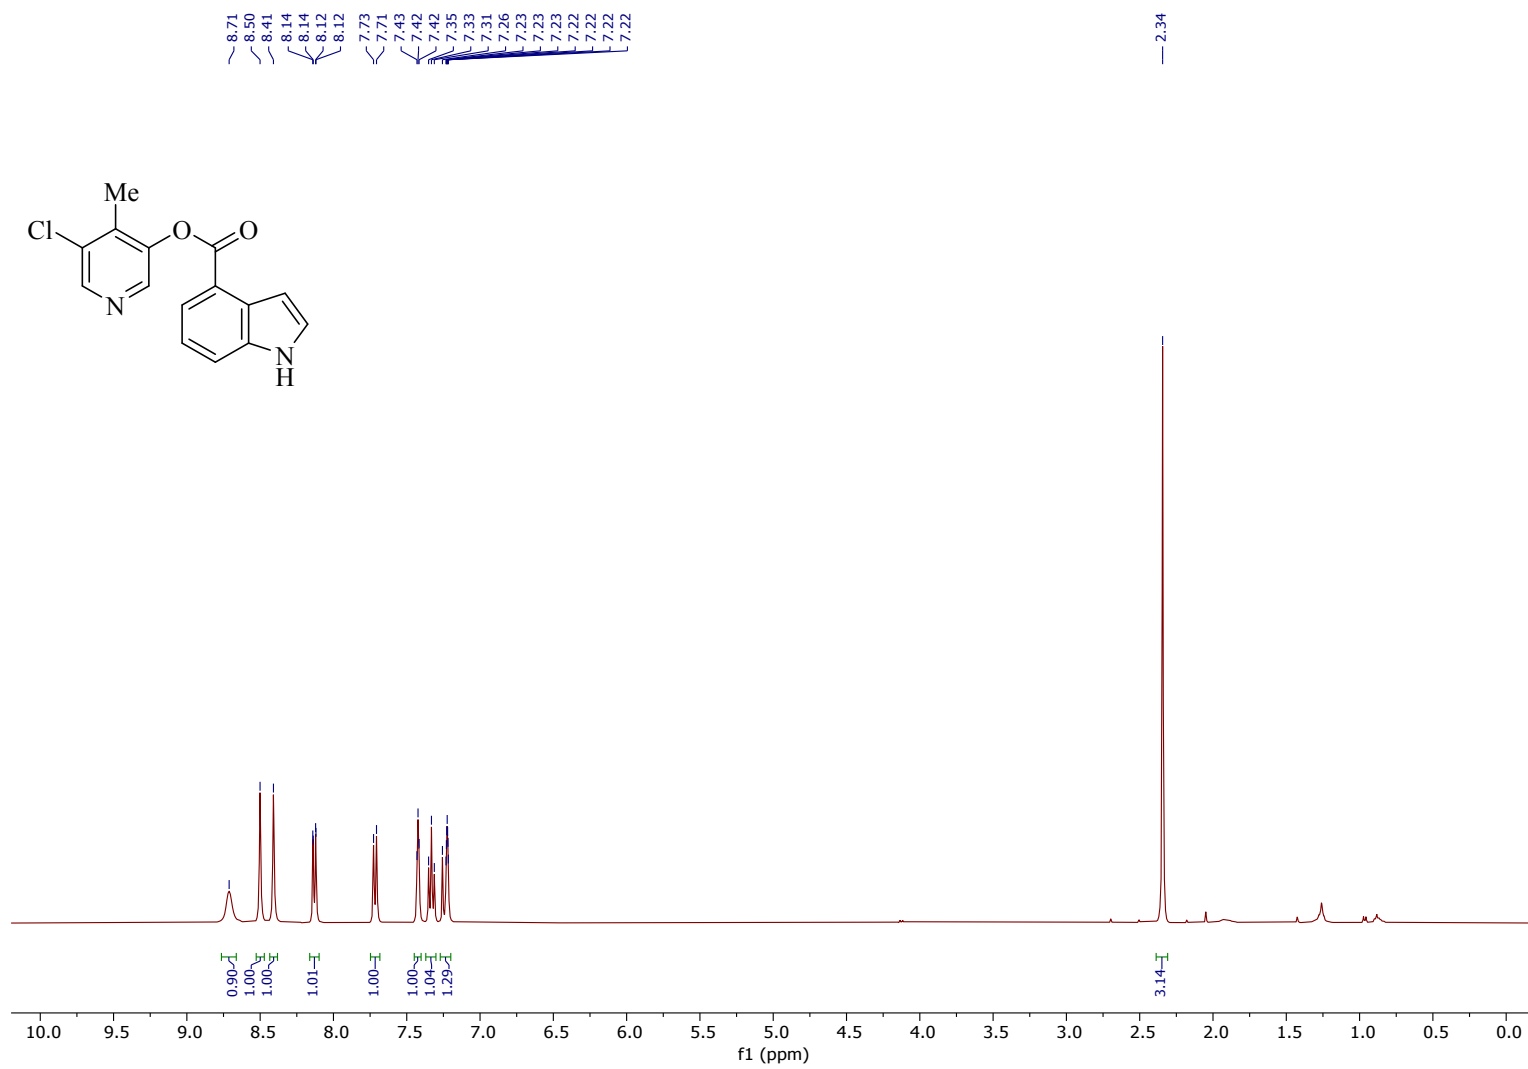

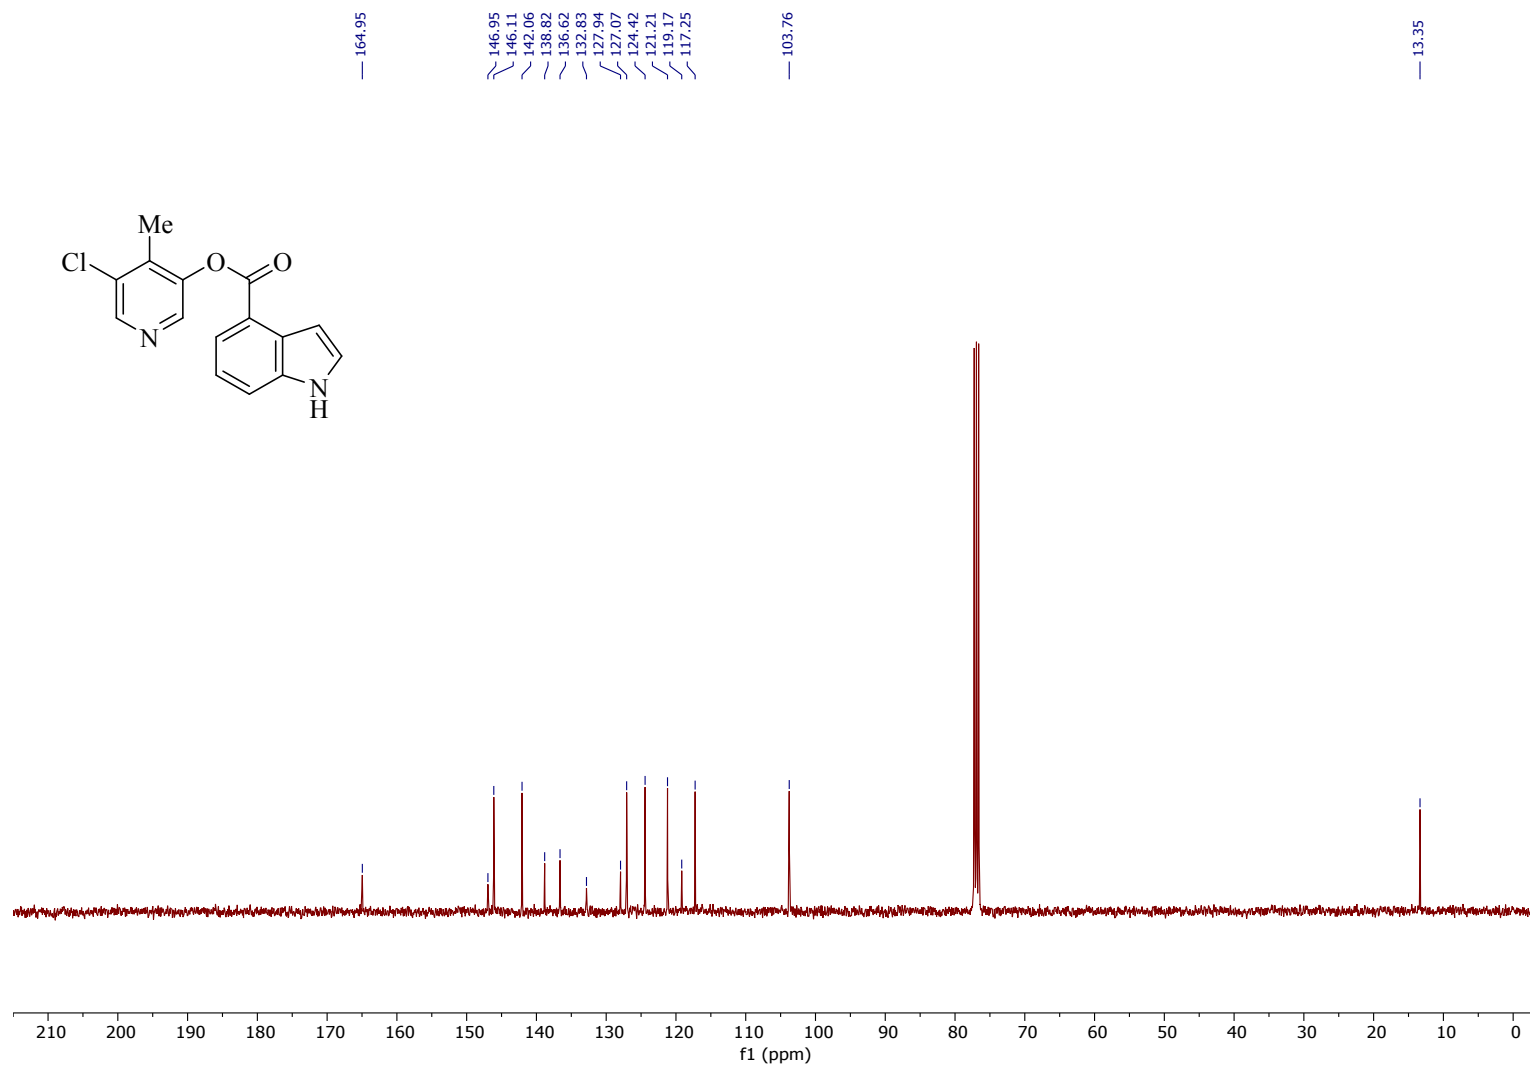

**<sup>13</sup>C NMR (100 MHz, CDCl<sub>3</sub>) of Compound 9d**

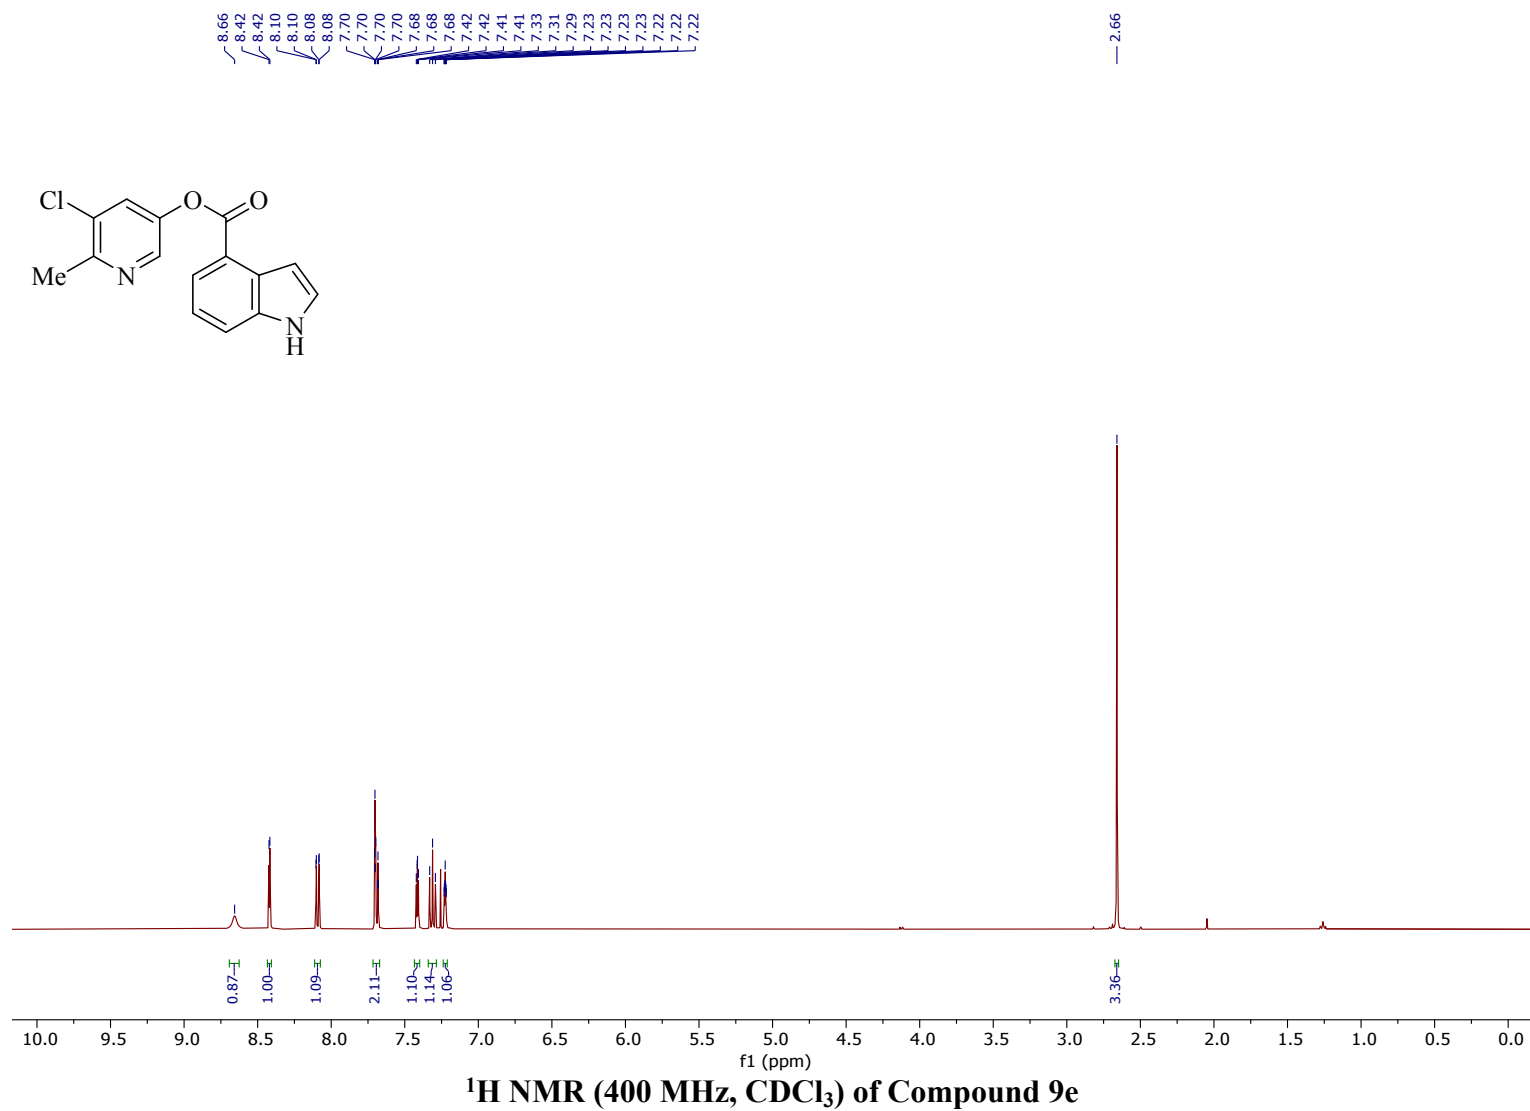

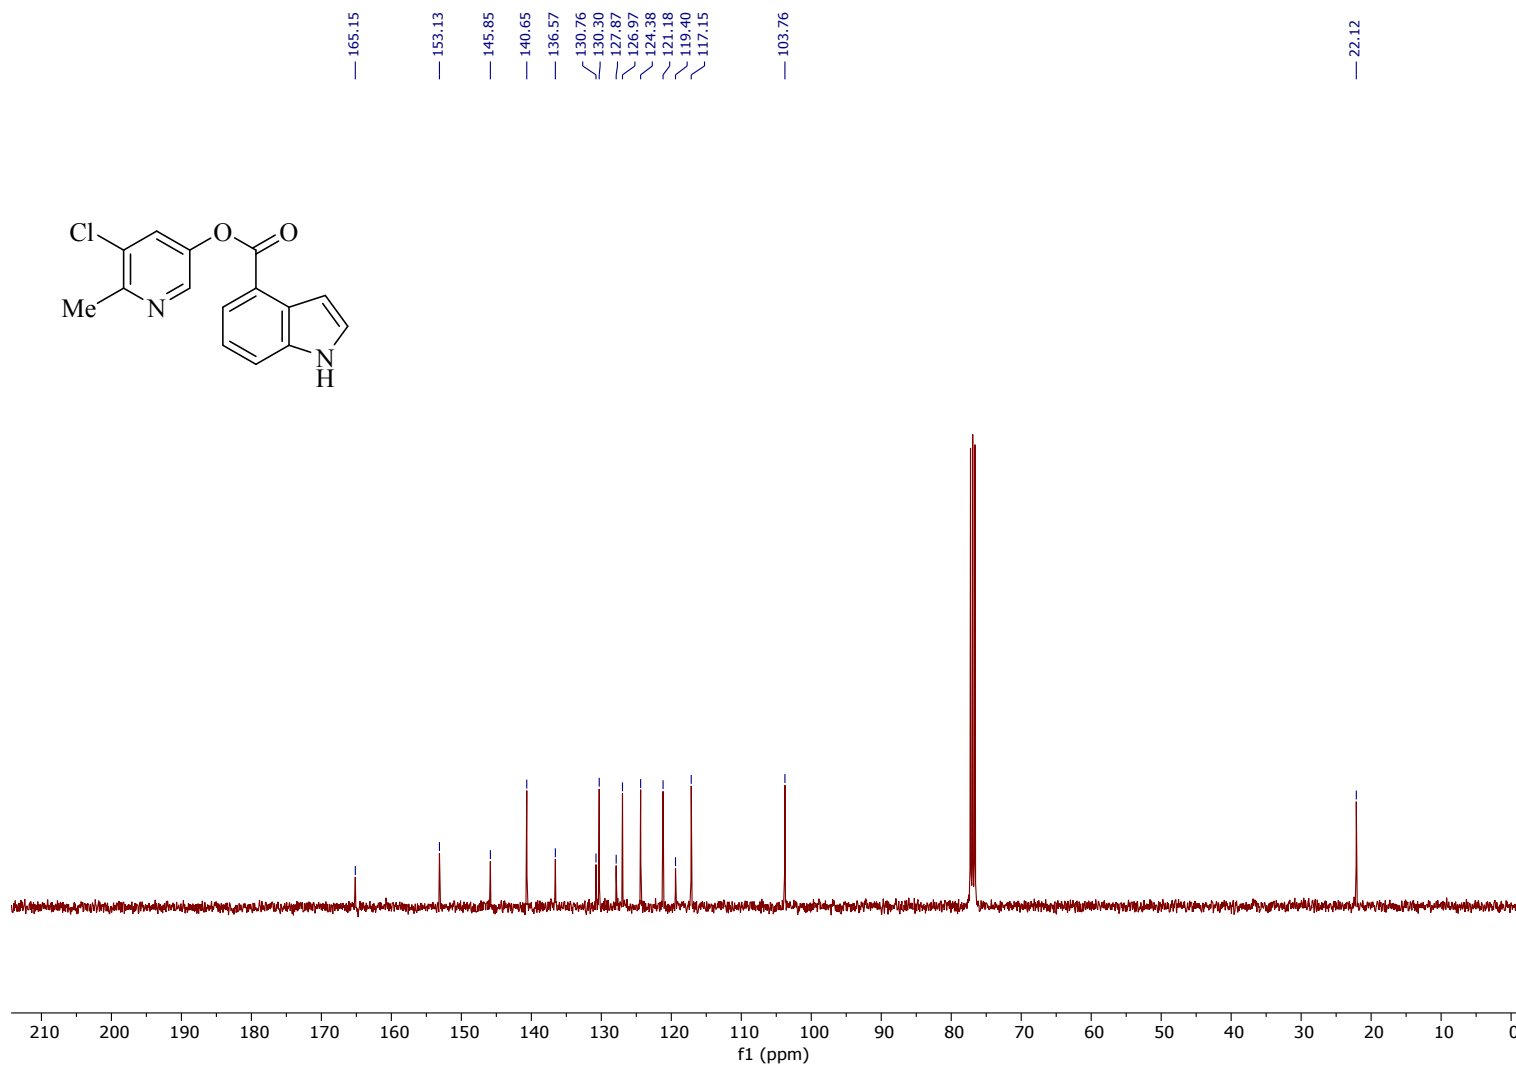

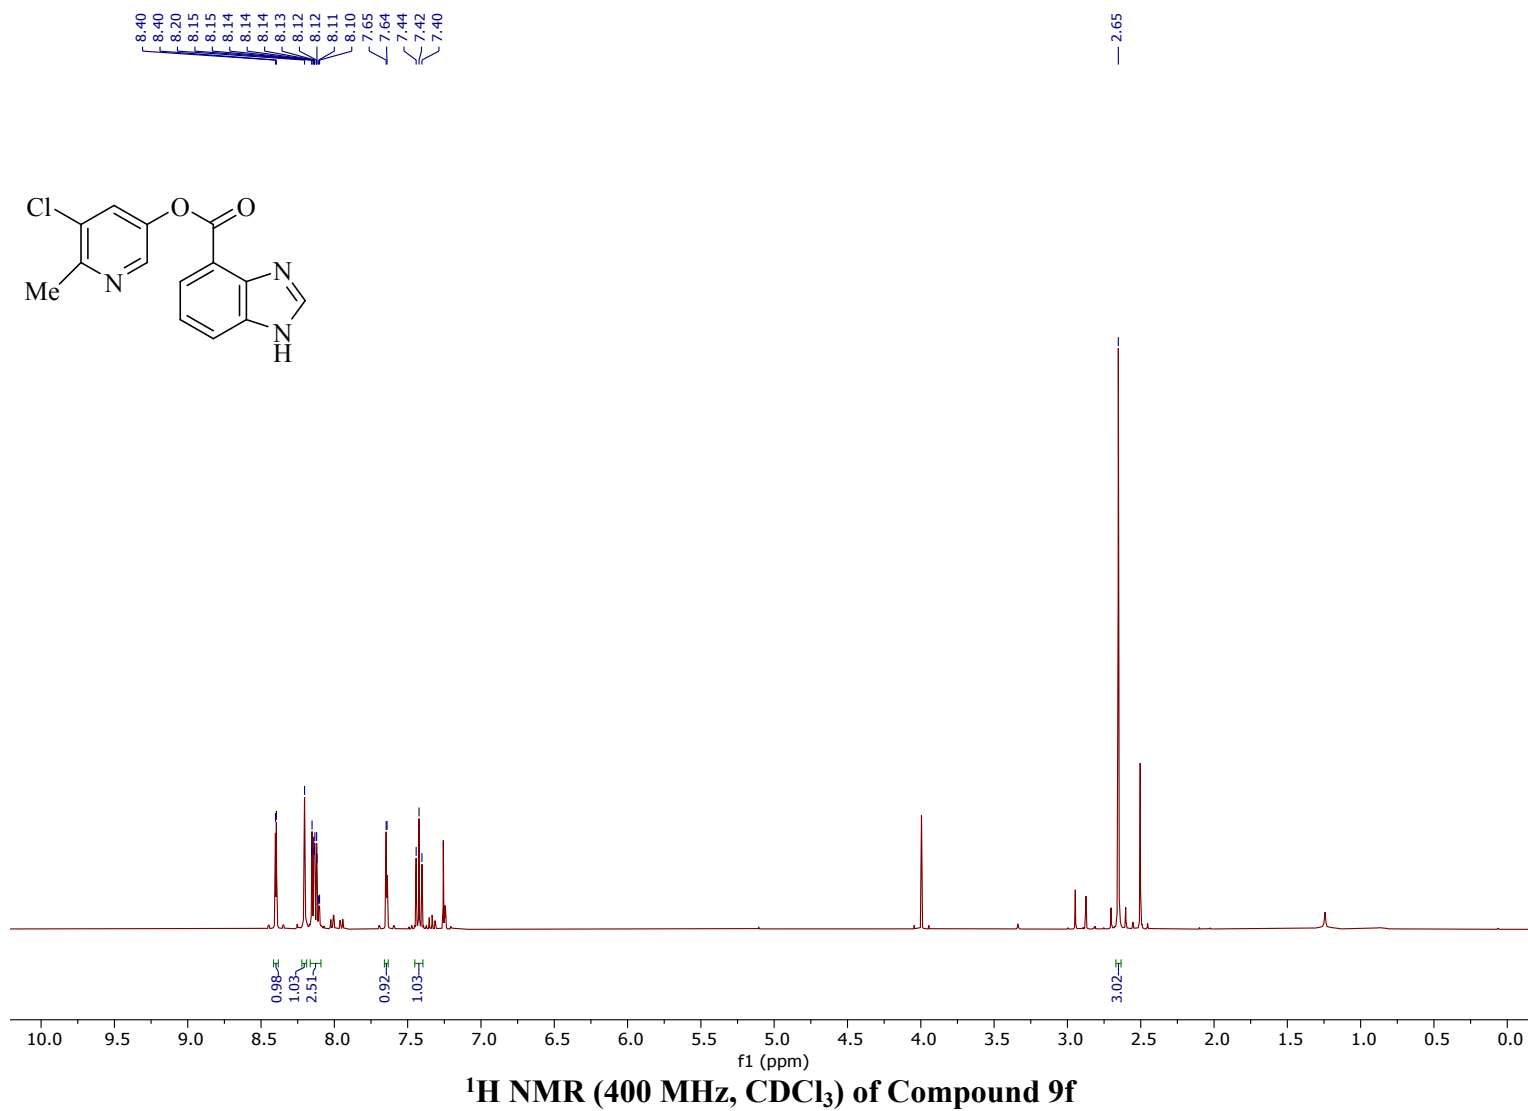

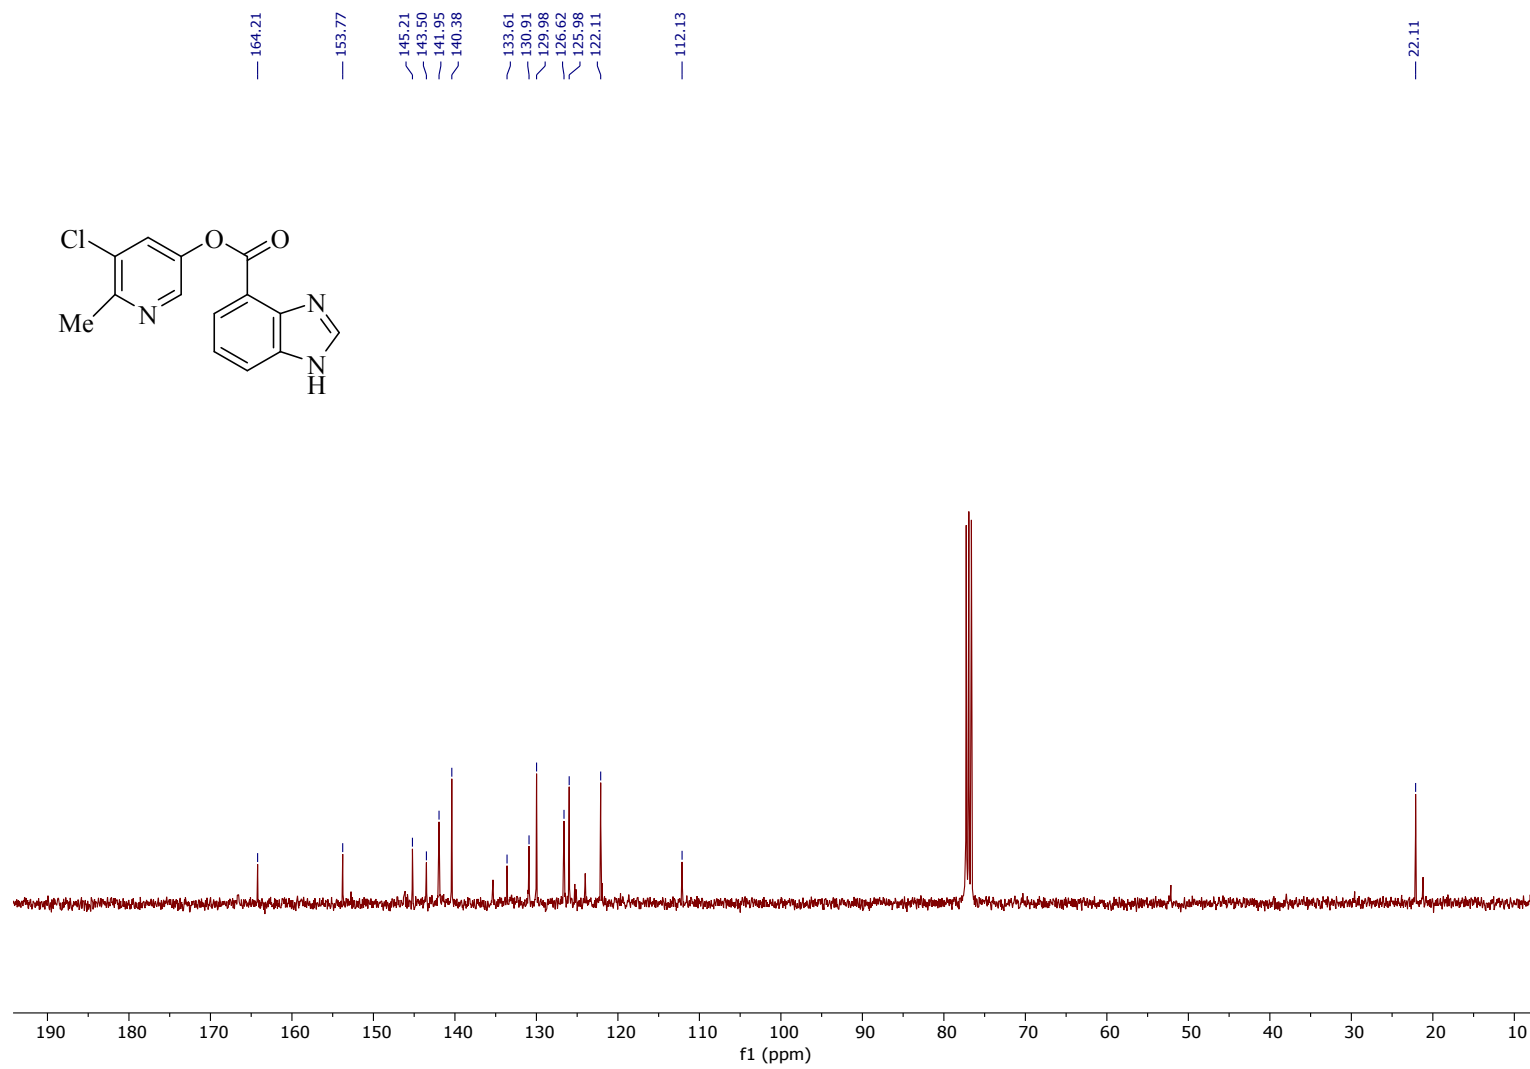

**<sup>13</sup>C NMR (100 MHz, CDCl<sub>3</sub>) of Compound 9f**

Data File C:\Chem32\1\Data\GRL-09-20 (Compd-1) 183.D  
Sample Name: GRL-09-20 (Compd-1)

```
=====
Acq. Operator   : SYSTEM
Sample Operator : SYSTEM
Acq. Instrument : LC2                      Location : 1
Injection Date  : 7/30/2021 1:23:20 PM
                                           Inj Volume : 5.000 µl
Method          : C:\CHEM32\1\METHODS\HMS_ZORBAXNH2.M
Last changed    : 7/30/2021 1:22:33 PM by SYSTEM
                 (modified after loading)
Sample Info     : 50% MeCN
                 0.8 mL/min
                 254 nm
                 5 µL inj.
                 1 mg/mL
                 YMCPAK ODS-A
=====
```

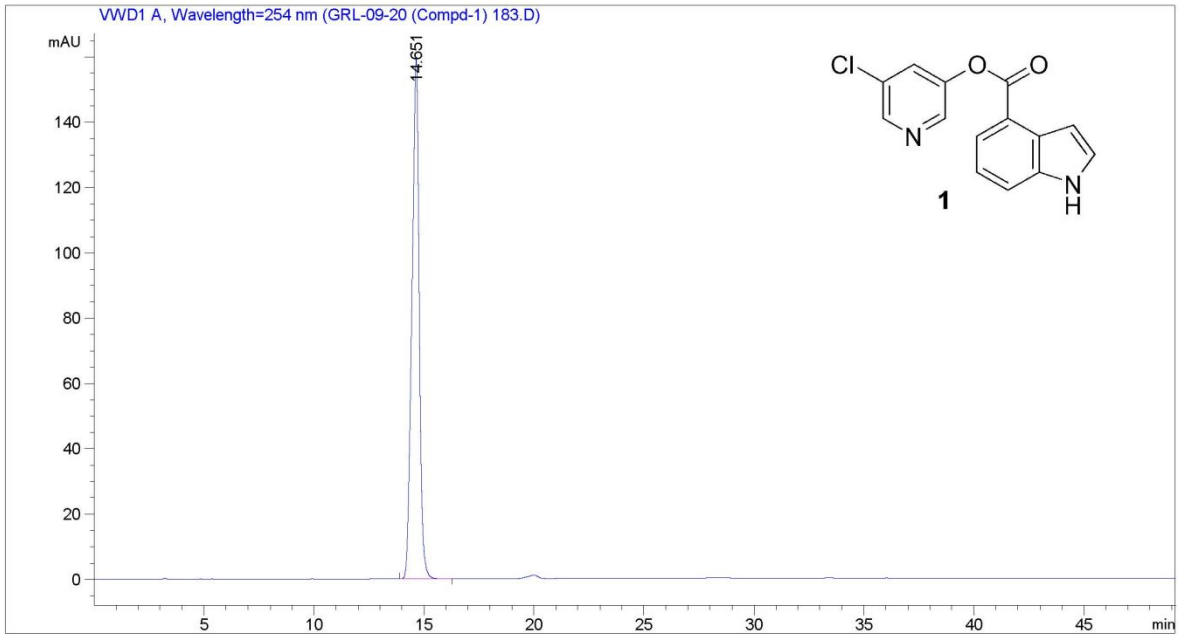

=====  
Fraction Information  
=====

No Fractions found.  
=====

=====  
Area Percent Report  
=====

```
Sorted By      : Signal
Multiplier     : 1.0000
Dilution       : 1.0000
Sample Amount  : 1.00000 [ng/ul] (not used in calc.)
Use Multiplier & Dilution Factor with ISTDs
```

Data File C:\Chem32\1\Data\GRL-09-20 (Compd-1) 183.D  
Sample Name: GRL-09-20 (Compd-1)

Signal 1: VWD1 A, Wavelength=254 nm

| Peak # | RetTime [min] | Type | Width [min] | Area [mAU*s] | Height [mAU] | Area %   |
|--------|---------------|------|-------------|--------------|--------------|----------|
| 1      | 14.651        | BB   | 0.3326      | 3662.51416   | 159.10939    | 100.0000 |

Totals :                   3662.51416 159.10939

=====  
\*\*\* End of Report \*\*\*



Data File C:\Chem32\1\Data\GRL-17-20 (Compd-2) 203.D  
Sample Name: GRL-17-20 (Compd-2)

```
=====
Acq. Operator   : SYSTEM
Sample Operator : SYSTEM
Acq. Instrument : LC2                      Location : 1
Injection Date  : 8/4/2021 5:35:25 PM
                                           Inj Volume : 5.000 µl
Method          : C:\CHEM32\1\METHODS\HMS_ZORBAXNH2.M
Last changed    : 8/4/2021 4:51:51 PM by SYSTEM
                 (modified after loading)
Sample Info     : 50% MeCN/H2O
                 0.8 mL/min
                 254 nm
                 5 µL inj.
                 1 mg/mL
                 YMCPAK ODS-A
=====
```

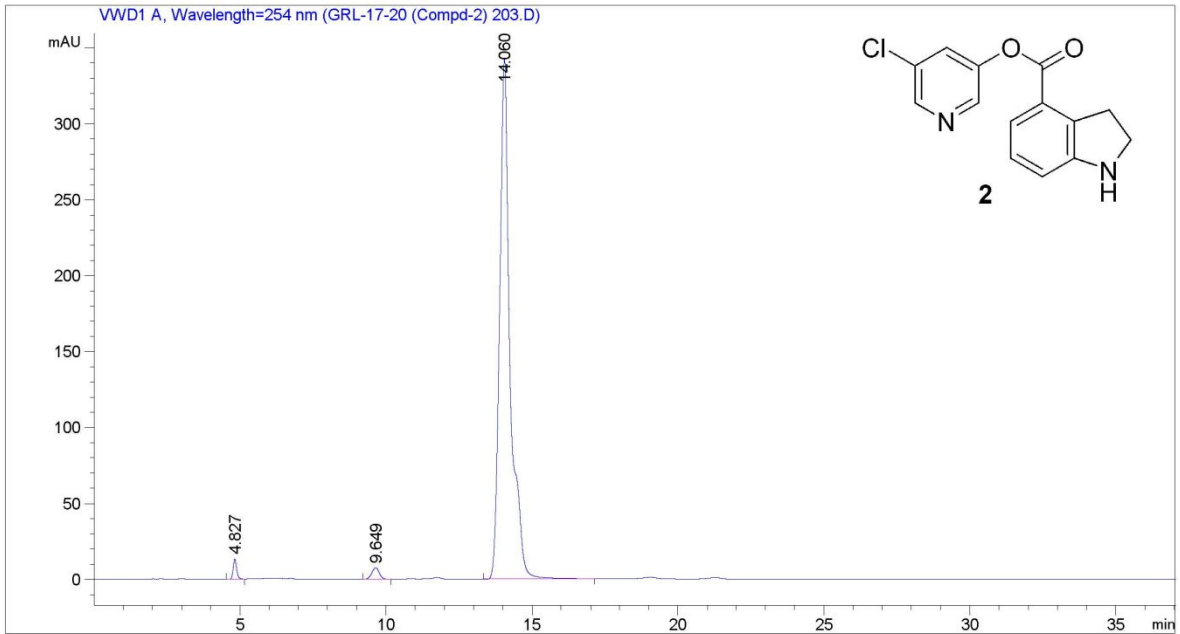

=====  
Fraction Information  
=====

No Fractions found.  
=====

=====  
Area Percent Report  
=====

```
Sorted By      : Signal
Multiplier     : 1.0000
Dilution       : 1.0000
Sample Amount  : 1.00000 [ng/ul] (not used in calc.)
Use Multiplier & Dilution Factor with ISTDs
```

Data File C:\Chem32\1\Data\GRL-17-20 (Compd-2) 203.D  
Sample Name: GRL-17-20 (Compd-2)

Signal 1: VWD1 A, Wavelength=254 nm

| Peak # | RetTime [min] | Type | Width [min] | Area [mAU*s] | Height [mAU] | Area %  |
|--------|---------------|------|-------------|--------------|--------------|---------|
| 1      | 4.827         | BB   | 0.1242      | 107.90797    | 13.22163     | 1.2268  |
| 2      | 9.649         | BB   | 0.2729      | 132.48586    | 7.54188      | 1.5062  |
| 3      | 14.060        | BB   | 0.3555      | 8555.67383   | 342.41159    | 97.2670 |

Totals :                    8796.06766   363.17510

=====  
\*\*\* End of Report \*\*\*

Data File C:\Chem32\1\Data\GRL-091-21 (Compd-7a) 205.D  
Sample Name: GRL-091-21 (Compd-7a)

=====  
Acq. Operator : SYSTEM  
Sample Operator : SYSTEM  
Acq. Instrument : LC2 Location : 1  
Injection Date : 8/4/2021 8:52:43 PM Inj Volume : 5.000 µl  
Method : C:\CHEM32\1\METHODS\HMS\_ZORBAXNH2.M  
Last changed : 8/4/2021 8:33:40 PM by SYSTEM  
(modified after loading)  
Sample Info : 50% MeCN/H2O  
0.8 mL/min  
254 nm  
5 µL inj.  
1 mg/mL  
YMCPAK ODS-A

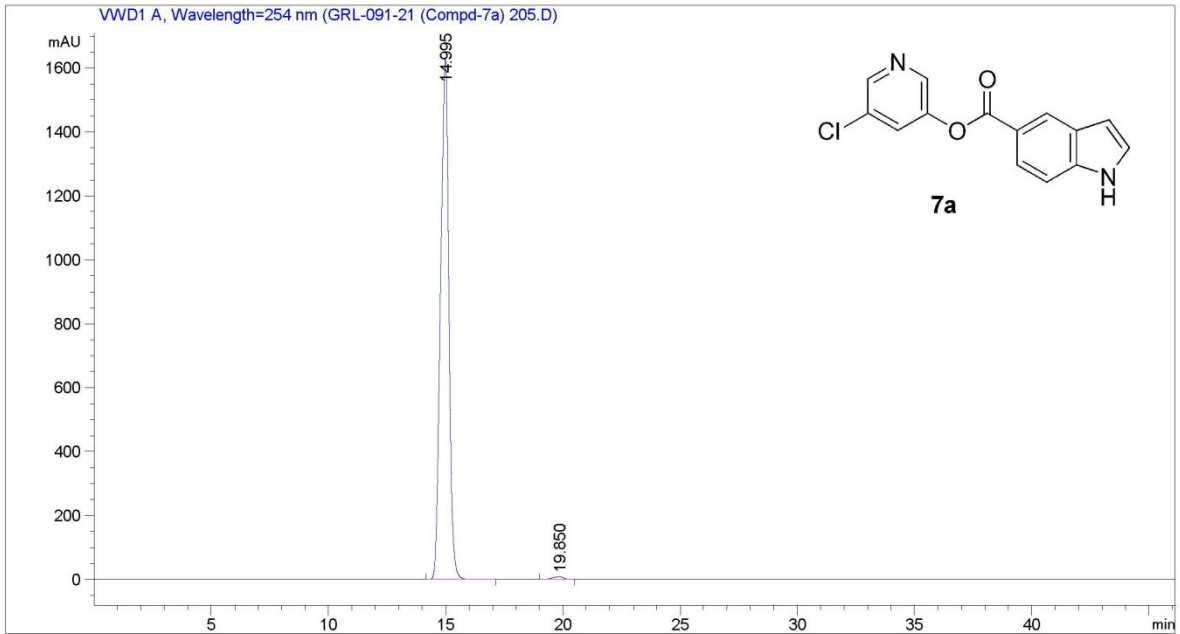

=====  
Fraction Information  
=====

No Fractions found.  
=====

=====  
Area Percent Report  
=====

Sorted By : Signal  
Multiplier : 1.0000  
Dilution : 1.0000  
Sample Amount: : 1.00000 [ng/ul] (not used in calc.)  
Use Multiplier & Dilution Factor with ISTDs

Data File C:\Chem32\1\Data\GRL-091-21 (Compd-7a) 205.D  
Sample Name: GRL-091-21 (Compd-7a)

Signal 1: VWD1 A, Wavelength=254 nm

| Peak # | RetTime [min] | Type | Width [min] | Area [mAU*s] | Height [mAU] | Area %  |
|--------|---------------|------|-------------|--------------|--------------|---------|
| 1      | 14.995        | BB   | 0.4056      | 4.01335e4    | 1628.01428   | 99.2866 |
| 2      | 19.850        | BB   | 0.4433      | 288.36905    | 9.31197      | 0.7134  |

Totals :                   4.04219e4 1637.32625

=====  
\*\*\* End of Report \*\*\*

Data File C:\Chem32\1\Data\GRL-090-21 (Compd-7b) 206.D  
Sample Name: GRL-090-21 (Compd-7b)

=====  
Acq. Operator : SYSTEM  
Sample Operator : SYSTEM  
Acq. Instrument : LC2 Location : 1  
Injection Date : 8/5/2021 10:33:22 AM Inj Volume : 5.000 µl  
Method : C:\CHEM32\1\METHODS\HMS\_ZORBAXNH2.M  
Last changed : 8/4/2021 8:33:40 PM by SYSTEM  
(modified after loading)  
Sample Info : 50% MeCN/H2O  
0.8 mL/min  
254 nm  
5 µL inj.  
1 mg/mL  
YMCPAK ODS-A

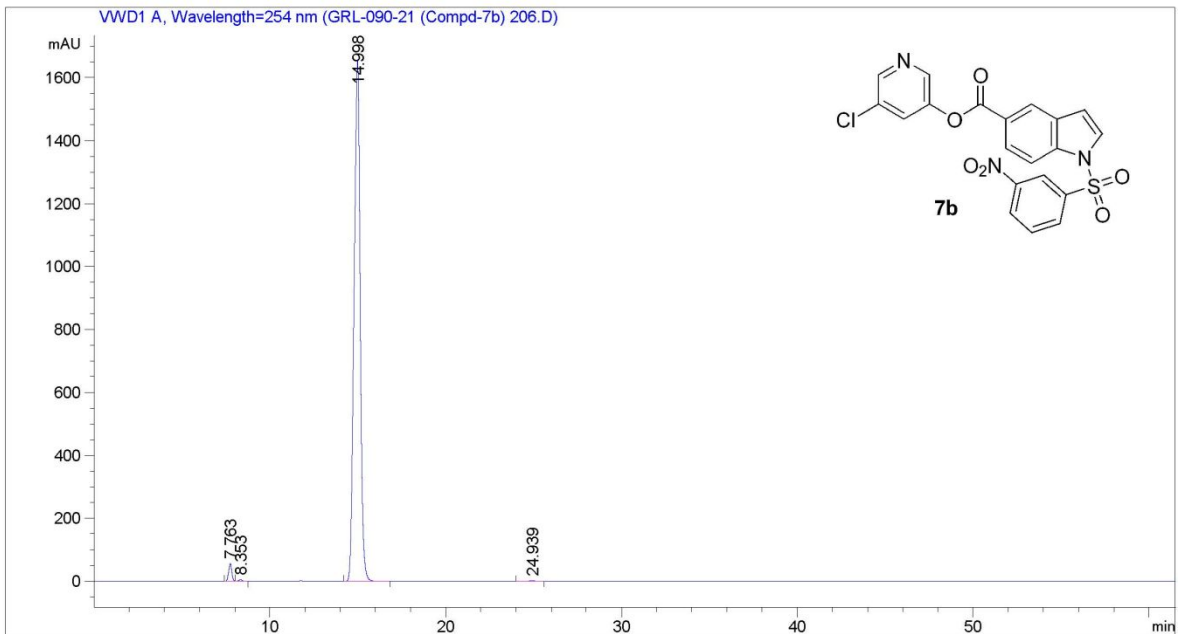

=====  
Fraction Information  
=====

No Fractions found.  
=====

=====  
Area Percent Report  
=====

Sorted By : Signal  
Multiplier : 1.0000  
Dilution : 1.0000  
Sample Amount: : 1.00000 [ng/ul] (not used in calc.)  
Use Multiplier & Dilution Factor with ISTDs

Data File C:\Chem32\1\Data\GRL-090-21 (Compd-7b) 206.D  
Sample Name: GRL-090-21 (Compd-7b)

Signal 1: VWD1 A, Wavelength=254 nm

| Peak # | RetTime [min] | Type | Width [min] | Area [mAU*s] | Height [mAU] | Area %  |
|--------|---------------|------|-------------|--------------|--------------|---------|
| 1      | 7.763         | BV R | 0.1940      | 704.71271    | 57.08348     | 1.7267  |
| 2      | 8.353         | VB E | 0.1960      | 74.28173     | 5.62638      | 0.1820  |
| 3      | 14.998        | BB   | 0.3950      | 3.99600e4    | 1653.33862   | 97.9129 |
| 4      | 24.939        | BB   | 0.5246      | 72.77259     | 1.92280      | 0.1783  |

Totals :                    4.08118e4 1717.97128

=====  
\*\*\* End of Report \*\*\*

Data File C:\Chem32\1\Data\GRL-63-20 (Compd-7c) 190.D  
Sample Name: GRL-63-20 (Compd-7c)

=====  
Acq. Operator : SYSTEM  
Sample Operator : SYSTEM  
Acq. Instrument : LC2 Location : 1  
Injection Date : 8/2/2021 11:16:37 AM Inj Volume : 5.000 µl  
Method : C:\CHEM32\1\METHODS\HMS\_ZORBAXNH2.M  
Last changed : 8/2/2021 10:32:47 AM by SYSTEM  
(modified after loading)  
Sample Info : 50% MeCN/H2O  
0.8 mL/min  
254 nm  
5 µL inj.  
1 mg/mL  
YMCPAK ODS-A

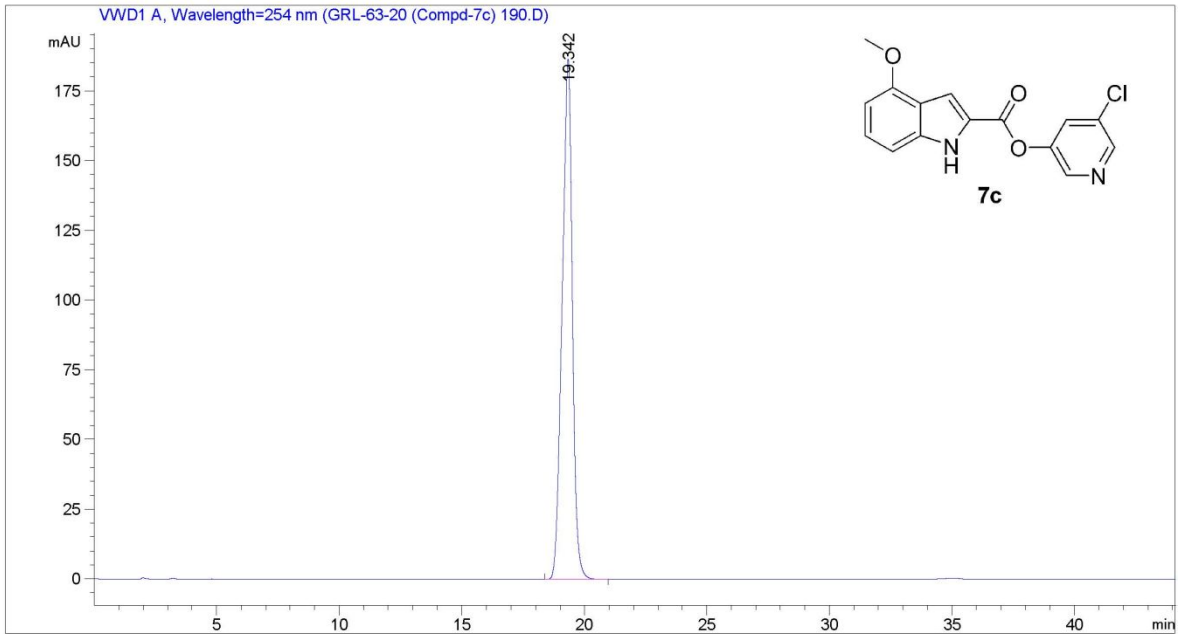

=====  
Fraction Information  
=====

No Fractions found.  
=====

=====  
Area Percent Report  
=====

Sorted By : Signal  
Multiplier : 1.0000  
Dilution : 1.0000  
Sample Amount: : 1.00000 [ng/ul] (not used in calc.)  
Use Multiplier & Dilution Factor with ISTDs

Data File C:\Chem32\1\Data\GRL-63-20 (Compd-7c) 190.D  
Sample Name: GRL-63-20 (Compd-7c)

Signal 1: VWD1 A, Wavelength=254 nm

| Peak # | RetTime [min] | Type | Width [min] | Area [mAU*s] | Height [mAU] | Area %   |
|--------|---------------|------|-------------|--------------|--------------|----------|
| 1      | 19.342        | BB   | 0.4222      | 5408.72852   | 186.57550    | 100.0000 |

Totals :                    5408.72852  186.57550

=====  
\*\*\* End of Report \*\*\*



Data File C:\Chem32\1\Data\GRL-08-20 (Compd-7d) 195.D  
Sample Name: GRL-08-20 (Compd-7d)

```
=====
Acq. Operator   : SYSTEM
Sample Operator : SYSTEM
Acq. Instrument : LC2                      Location : 1
Injection Date  : 8/3/2021 11:52:24 AM
                                           Inj Volume : 5.000 µl
Method          : C:\CHEM32\1\METHODS\HMS_ZORBAXNH2.M
Last changed    : 8/3/2021 11:11:10 AM by SYSTEM
                 (modified after loading)
Sample Info     : 50% MeCN/H2O
                 0.8 mL/min
                 254 nm
                 5 uL inj.
                 1 mg/mL
                 YMCPAK ODS-A
=====
```

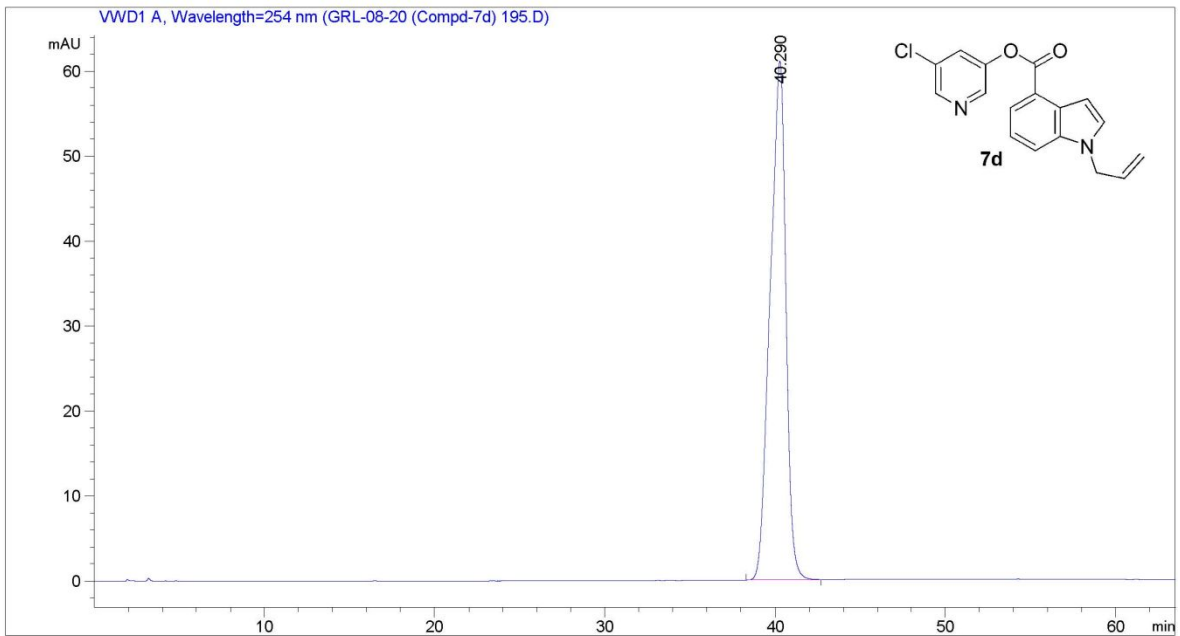

=====  
Fraction Information  
=====

No Fractions found.  
=====

=====  
Area Percent Report  
=====

```
Sorted By      : Signal
Multiplier     : 1.0000
Dilution       : 1.0000
Sample Amount  : 1.00000 [ng/ul] (not used in calc.)
Use Multiplier & Dilution Factor with ISTDs
```

Data File C:\Chem32\1\Data\GRL-08-20 (Compd-7d) 195.D  
Sample Name: GRL-08-20 (Compd-7d)

Signal 1: VWD1 A, Wavelength=254 nm

| Peak # | RetTime [min] | Type | Width [min] | Area [mAU*s] | Height [mAU] | Area %   |
|--------|---------------|------|-------------|--------------|--------------|----------|
| 1      | 40.290        | BB   | 0.9119      | 3906.91724   | 61.02806     | 100.0000 |

Totals :                   3906.91724   61.02806

=====  
\*\*\* End of Report \*\*\*

Data File C:\Chem32\1\Data\GRL-123-20 (Compd-7e) 215.D  
Sample Name: GRL-123-20 (Compd-7e)

```
=====
Acq. Operator   : SYSTEM
Sample Operator : SYSTEM
Acq. Instrument : LC2                      Location : 1
Injection Date  : 8/7/2021 5:56:38 PM
                                           Inj Volume : 5.000 µl
Method         : C:\CHEM32\1\METHODS\HMS_ZORBAXNH2.M
Last changed   : 8/7/2021 4:59:13 PM by SYSTEM
                (modified after loading)
Sample Info    : 65% MeCN/H2O
                0.8 mL/min
                254 nm
                5 uL inj.
                1 mg/mL
                YMCPAK ODS-A
=====
```

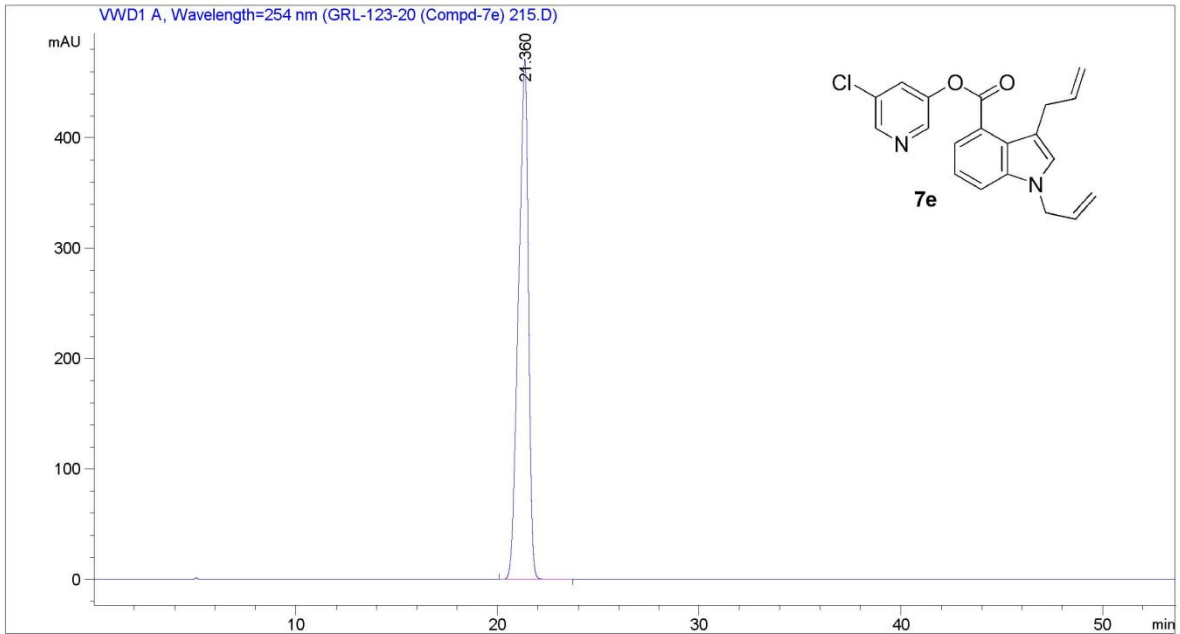

=====  
Fraction Information  
=====

No Fractions found.  
=====

=====  
Area Percent Report  
=====

```
Sorted By      : Signal
Multiplier     : 1.0000
Dilution       : 1.0000
Sample Amount  : 1.00000 [ng/ul] (not used in calc.)
Use Multiplier & Dilution Factor with ISTDs
```

Data File C:\Chem32\1\Data\GRL-123-20 (Compd-7e) 215.D  
Sample Name: GRL-123-20 (Compd-7e)

Signal 1: VWD1 A, Wavelength=254 nm

| Peak # | RetTime [min] | Type | Width [min] | Area [mAU*s] | Height [mAU] | Area %   |
|--------|---------------|------|-------------|--------------|--------------|----------|
| 1      | 21.360        | BB   | 0.4864      | 1.60585e4    | 471.40701    | 100.0000 |

Totals :                   1.60585e4   471.40701

=====  
\*\*\* End of Report \*\*\*

Data File C:\Chem32\1\Data\GRL-70-20 (Compd-7f) 196.D  
Sample Name: GRL-70-20 (Compd-7f)

```
=====
Acq. Operator   : SYSTEM
Sample Operator : SYSTEM
Acq. Instrument : LC2                      Location : 1
Injection Date  : 8/3/2021 2:40:16 PM
                                           Inj Volume : 5.000 µl
Method          : C:\CHEM32\1\METHODS\HMS_ZORBAXNH2.M
Last changed    : 8/3/2021 1:48:59 PM by SYSTEM
                 (modified after loading)
Sample Info     : 50% MeCN/H2O
                 0.8 mL/min
                 254 nm
                 5 µL inj.
                 1 mg/mL
                 YMCPAK ODS-A
=====
```

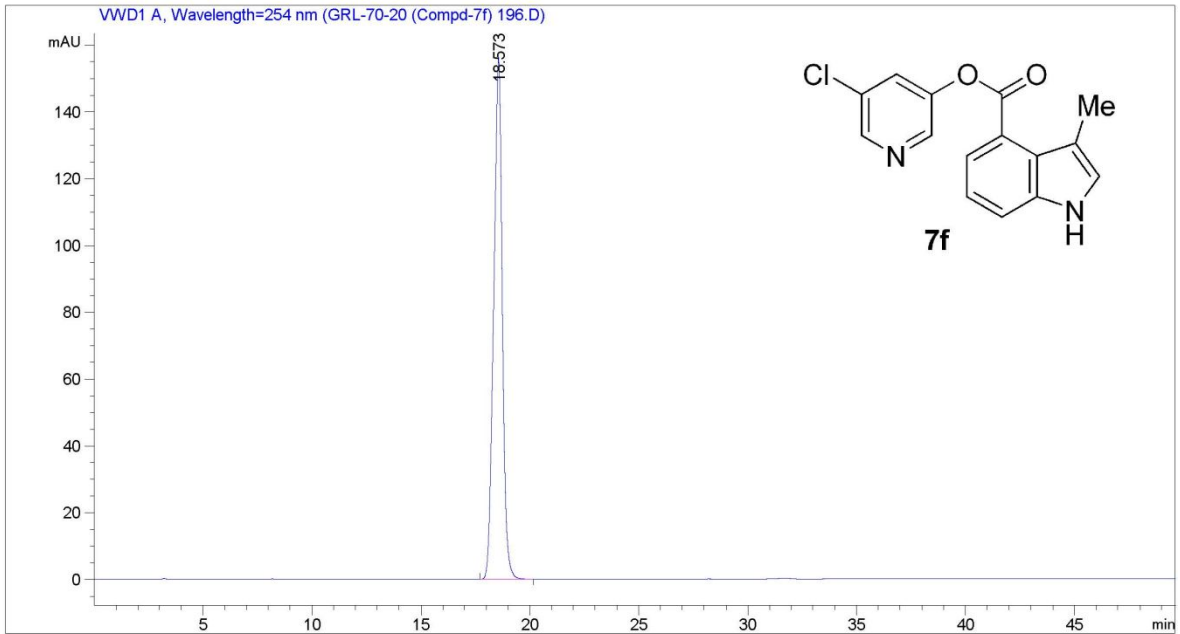

=====  
Fraction Information  
=====

No Fractions found.  
=====

=====  
Area Percent Report  
=====

```
Sorted By      : Signal
Multiplier     : 1.0000
Dilution       : 1.0000
Sample Amount  : 1.00000 [ng/ul] (not used in calc.)
Use Multiplier & Dilution Factor with ISTDs
```

Data File C:\Chem32\1\Data\GRL-70-20 (Compd-7f) 196.D  
Sample Name: GRL-70-20 (Compd-7f)

Signal 1: VWD1 A, Wavelength=254 nm

| Peak # | RetTime [min] | Type | Width [min] | Area [mAU*s] | Height [mAU] | Area %   |
|--------|---------------|------|-------------|--------------|--------------|----------|
| 1      | 18.573        | BB   | 0.4012      | 4274.72607   | 155.73651    | 100.0000 |

Totals :                   4274.72607 155.73651

=====  
\*\*\* End of Report \*\*\*

Data File C:\Chem32\1\Data\GRL-167-20 (Compd-7g) 198.D  
Sample Name: GRL-167-20 (Compd-7g)

=====  
Acq. Operator : SYSTEM  
Sample Operator : SYSTEM  
Acq. Instrument : LC2 Location : 1  
Injection Date : 8/3/2021 6:22:38 PM Inj Volume : 5.000 µl  
Method : C:\CHEM32\1\METHODS\HMS\_ZORBAXNH2.M  
Last changed : 8/3/2021 5:32:08 PM by SYSTEM  
(modified after loading)  
Sample Info : 50% MeCN/H2O  
0.8 mL/min  
254 nm  
5 µL inj.  
1 mg/mL  
YMCPAK ODS-A

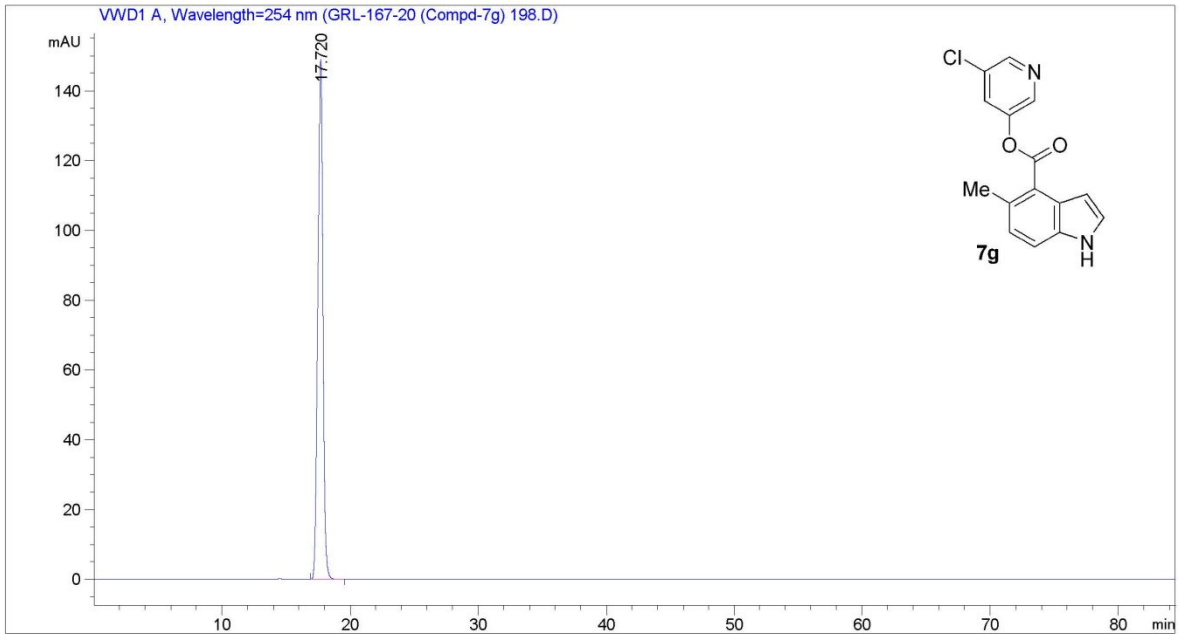

=====  
Fraction Information  
=====

No Fractions found.  
=====

=====  
Area Percent Report  
=====

Sorted By : Signal  
Multiplier : 1.0000  
Dilution : 1.0000  
Sample Amount: : 1.00000 [ng/ul] (not used in calc.)  
Use Multiplier & Dilution Factor with ISTDs

Data File C:\Chem32\1\Data\GRL-167-20 (Compd-7g) 198.D  
Sample Name: GRL-167-20 (Compd-7g)

Signal 1: VWD1 A, Wavelength=254 nm

| Peak # | RetTime [min] | Type | Width [min] | Area [mAU*s] | Height [mAU] | Area %   |
|--------|---------------|------|-------------|--------------|--------------|----------|
| 1      | 17.720        | BB   | 0.4045      | 4120.62256   | 149.04968    | 100.0000 |

Totals :                    4120.62256 149.04968

=====  
\*\*\* End of Report \*\*\*



Data File C:\Chem32\1\Data\GRL-81-20 (Compd-7h) 185.D  
Sample Name: GRL-81-20 (Compd-7h)

```
=====
Acq. Operator   : SYSTEM
Sample Operator : SYSTEM
Acq. Instrument : LC2                      Location : 1
Injection Date  : 7/30/2021 4:14:42 PM
                                           Inj Volume : 5.000 µl
Method          : C:\CHEM32\1\METHODS\HMS_ZORBAXNH2.M
Last changed    : 7/30/2021 3:57:32 PM by SYSTEM
                 (modified after loading)
Sample Info     : 50% MeCN/H2O
                 0.8 mL/min
                 254 nm
                 5 µL inj.
                 1 mg/mL
                 YMCPAK ODS-A
=====
```

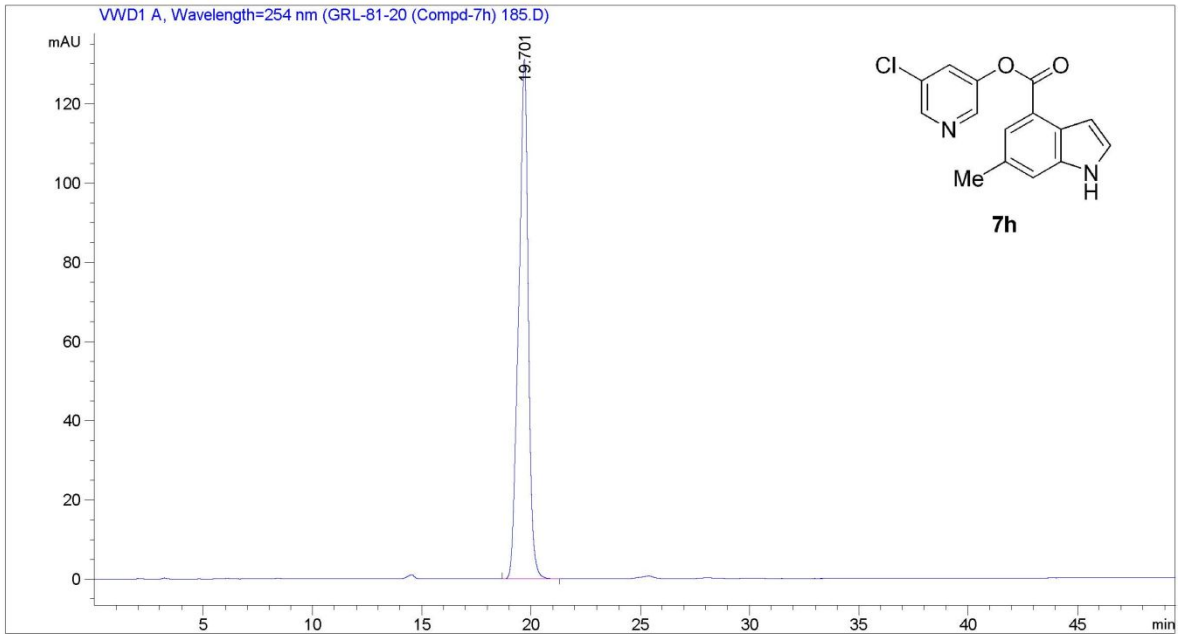

=====  
Fraction Information  
=====

No Fractions found.  
=====

=====  
Area Percent Report  
=====

```
Sorted By      : Signal
Multiplier     : 1.0000
Dilution       : 1.0000
Sample Amount  : 1.00000 [ng/ul] (not used in calc.)
Use Multiplier & Dilution Factor with ISTDs
```

Data File C:\Chem32\1\Data\GRL-81-20 (Compd-7h) 185.D  
Sample Name: GRL-81-20 (Compd-7h)

Signal 1: VWD1 A, Wavelength=254 nm

| Peak # | RetTime [min] | Type | Width [min] | Area [mAU*s] | Height [mAU] | Area %   |
|--------|---------------|------|-------------|--------------|--------------|----------|
| 1      | 19.701        | BB   | 0.4360      | 3989.20605   | 131.11749    | 100.0000 |

Totals :                    3989.20605  131.11749

=====  
\*\*\* End of Report \*\*\*

Data File C:\Chem32\1\Data\GRL-103-20 (Compd-7i) 191.D  
Sample Name: GRL-103-20 (Compd-7i)

=====  
Acq. Operator : SYSTEM  
Sample Operator : SYSTEM  
Acq. Instrument : LC2 Location : 1  
Injection Date : 8/2/2021 1:48:11 PM  
Inj Volume : 5.000 µl  
Method : C:\CHEM32\1\METHODS\HMS\_ZORBAXNH2.M  
Last changed : 8/2/2021 1:05:23 PM by SYSTEM  
(modified after loading)  
Sample Info : 50% MeCN/H2O  
0.8 mL/min  
254 nm  
5 µL inj.  
1 mg/mL  
YMCPAK ODS-A

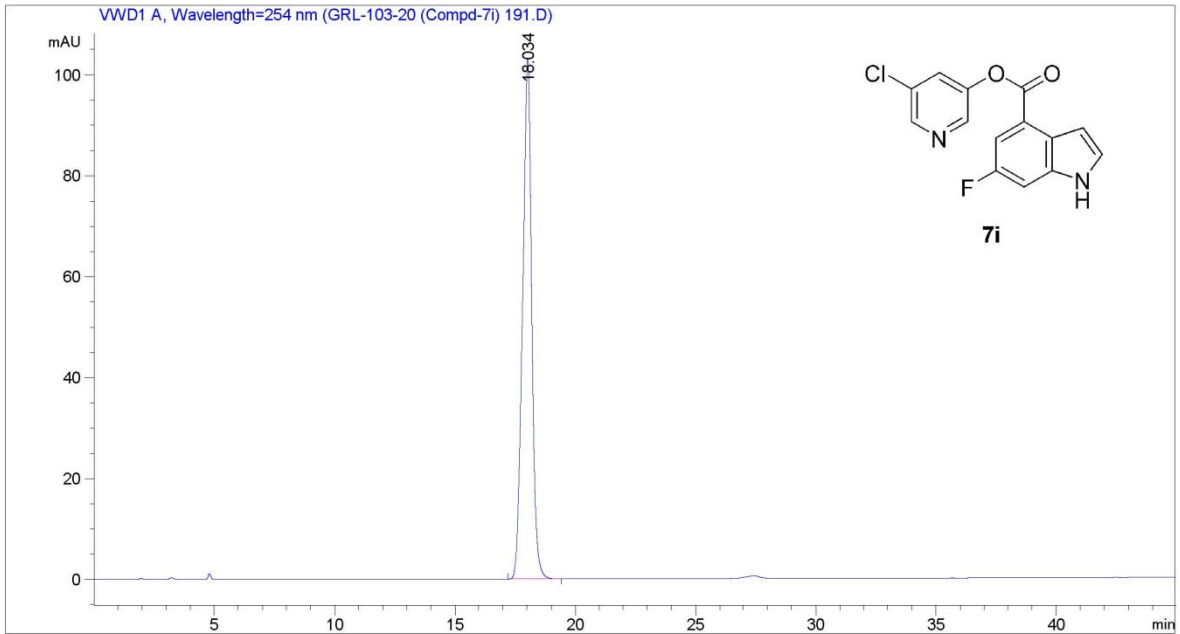

=====  
Fraction Information  
=====

No Fractions found.  
=====

=====  
Area Percent Report  
=====

Sorted By : Signal  
Multiplier : 1.0000  
Dilution : 1.0000  
Sample Amount: : 1.00000 [ng/ul] (not used in calc.)  
Use Multiplier & Dilution Factor with ISTDs

Data File C:\Chem32\1\Data\GRL-103-20 (Compd-7i) 191.D  
Sample Name: GRL-103-20 (Compd-7i)

Signal 1: VWD1 A, Wavelength=254 nm

| Peak # | RetTime [min] | Type | Width [min] | Area [mAU*s] | Height [mAU] | Area %   |
|--------|---------------|------|-------------|--------------|--------------|----------|
| 1      | 18.034        | BB   | 0.3860      | 2720.54126   | 103.04881    | 100.0000 |

Totals :                    2720.54126  103.04881

=====  
\*\*\* End of Report \*\*\*

Data File C:\Chem32\1\Data\GRL-145-20 (Compd-7j) 207.D  
Sample Name: GRL-145-20 (Compd-7j)

=====  
Acq. Operator : SYSTEM  
Sample Operator : SYSTEM  
Acq. Instrument : LC2 Location : 1  
Injection Date : 8/5/2021 12:19:28 PM Inj Volume : 5.000 µl  
Method : C:\CHEM32\1\METHODS\HMS\_ZORBAXNH2.M  
Last changed : 8/4/2021 8:33:40 PM by SYSTEM  
(modified after loading)  
Sample Info : 50% MeCN/H2O  
0.8 mL/min  
254 nm  
5 µL inj.  
1 mg/mL  
YMCPAK ODS-A

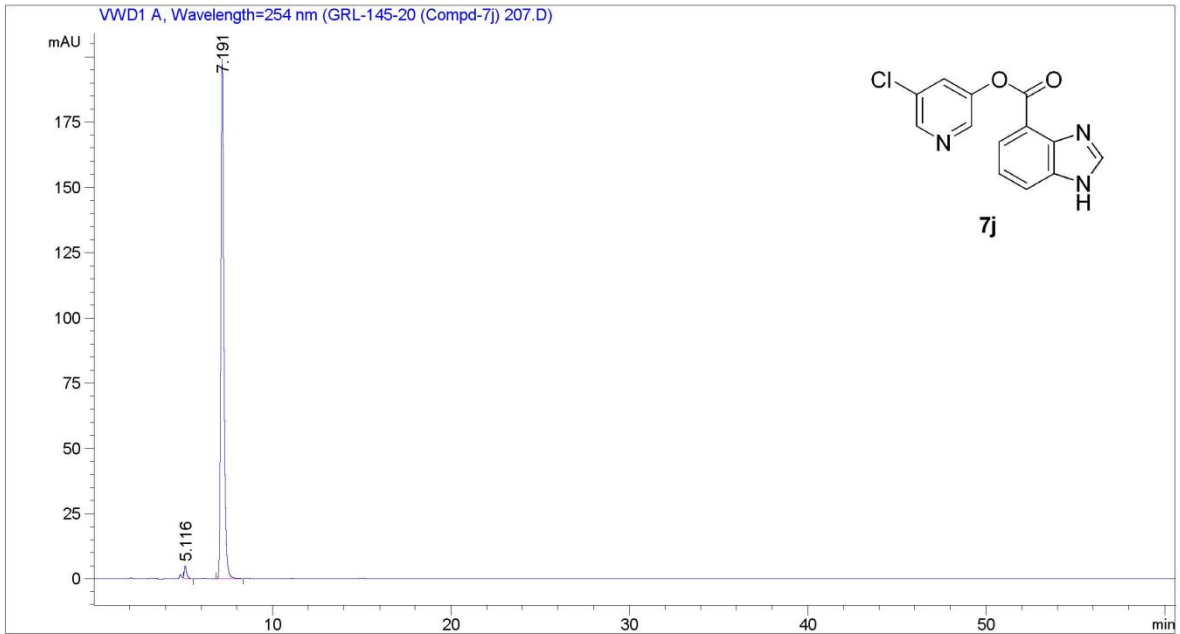

=====  
Fraction Information  
=====

No Fractions found.  
=====

=====  
Area Percent Report  
=====

Sorted By : Signal  
Multiplier : 1.0000  
Dilution : 1.0000  
Sample Amount : 1.00000 [ng/ul] (not used in calc.)  
Use Multiplier & Dilution Factor with ISTDs

Data File C:\Chem32\1\Data\GRL-145-20 (Compd-7j) 207.D  
Sample Name: GRL-145-20 (Compd-7j)

Signal 1: VWD1 A, Wavelength=254 nm

| Peak # | RetTime [min] | Type | Width [min] | Area [mAU*s] | Height [mAU] | Area %  |
|--------|---------------|------|-------------|--------------|--------------|---------|
| 1      | 5.116         | VB   | 0.1410      | 46.86685     | 4.92609      | 1.9715  |
| 2      | 7.191         | BB   | 0.1746      | 2330.38794   | 199.09828    | 98.0285 |

Totals :                    2377.25479   204.02438

=====  
\*\*\* End of Report \*\*\*

Data File C:\Chem32\1\Data\GRL-209-20 (Compd-7k) 192.D  
Sample Name: GRL-209-20 (Compd-7k)

```
=====
Acq. Operator   : SYSTEM
Sample Operator : SYSTEM
Acq. Instrument : LC2                      Location : 1
Injection Date  : 8/2/2021 4:10:31 PM
                                           Inj Volume : 5.000 µl
Method          : C:\CHEM32\1\METHODS\HMS_ZORBAXNH2.M
Last changed    : 8/2/2021 3:00:57 PM by SYSTEM
                 (modified after loading)
Sample Info     : 50% MeCN/H2O
                 0.8 mL/min
                 254 nm
                 5 µL inj.
                 1 mg/mL
                 YMCPAK ODS-A
=====
```

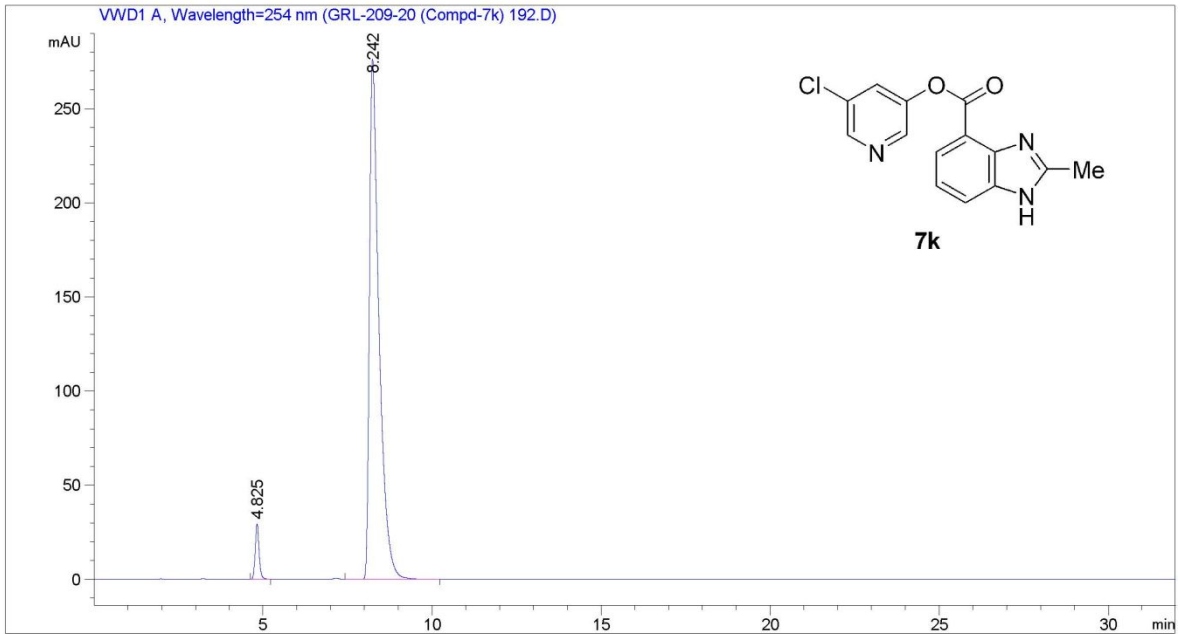

=====  
Fraction Information  
=====

No Fractions found.  
=====

=====  
Area Percent Report  
=====

```
Sorted By      : Signal
Multiplier     : 1.0000
Dilution       : 1.0000
Sample Amount  : 1.00000 [ng/ul] (not used in calc.)
Use Multiplier & Dilution Factor with ISTDs
```

Data File C:\Chem32\1\Data\GRL-209-20 (Compd-7k) 192.D  
Sample Name: GRL-209-20 (Compd-7k)

Signal 1: VWD1 A, Wavelength=254 nm

| Peak # | RetTime [min] | Type | Width [min] | Area [mAU*s] | Height [mAU] | Area %  |
|--------|---------------|------|-------------|--------------|--------------|---------|
| 1      | 4.825         | BB   | 0.1185      | 229.21916    | 29.23641     | 4.0551  |
| 2      | 8.242         | BB   | 0.2842      | 5423.39258   | 276.08188    | 95.9449 |

Totals :                    5652.61174   305.31829

=====  
\*\*\* End of Report \*\*\*



Data File C:\Chem32\1\Data\GRL-203-20 (Compd-71) 188.D  
Sample Name: GRL-203-20 (Compd-71)

```
=====
Acq. Operator   : SYSTEM
Sample Operator : SYSTEM
Acq. Instrument : LC2                      Location : 1
Injection Date  : 7/31/2021 4:00:10 PM
                                           Inj Volume : 5.000 µl
Method          : C:\CHEM32\1\METHODS\HMS_ZORBAXNH2.M
Last changed    : 7/31/2021 3:20:42 PM by SYSTEM
                 (modified after loading)
Sample Info     : 50% MeCN/H2O
                 0.8 mL/min
                 254 nm
                 5 µL inj.
                 1 mg/mL
                 YMCPAK ODS-A
=====
```

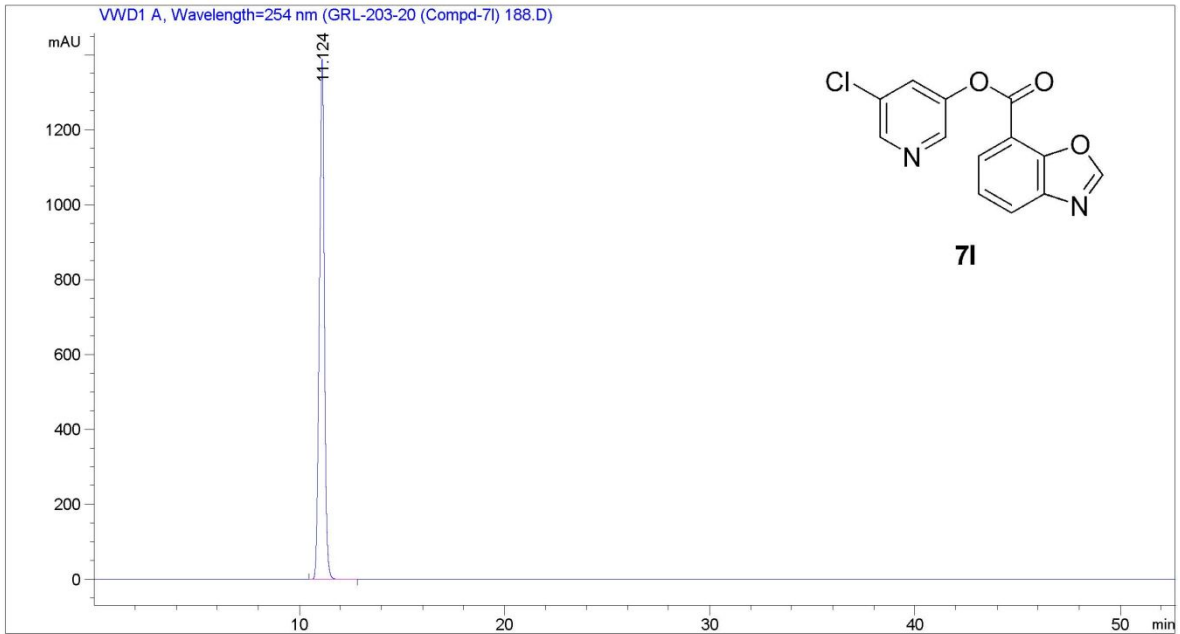

=====  
Fraction Information  
=====

No Fractions found.  
=====

=====  
Area Percent Report  
=====

```
Sorted By      : Signal
Multiplier     : 1.0000
Dilution       : 1.0000
Sample Amount  : 1.00000 [ng/ul] (not used in calc.)
Use Multiplier & Dilution Factor with ISTDs
```

Data File C:\Chem32\1\Data\GRL-203-20 (Compd-71) 188.D  
Sample Name: GRL-203-20 (Compd-71)

Signal 1: VWD1 A, Wavelength=254 nm

| Peak # | RetTime [min] | Type | Width [min] | Area [mAU*s] | Height [mAU] | Area %   |
|--------|---------------|------|-------------|--------------|--------------|----------|
| 1      | 11.124        | BB   | 0.2478      | 2.34398e4    | 1389.63794   | 100.0000 |

Totals :                    2.34398e4 1389.63794

=====  
\*\*\* End of Report \*\*\*

Data File C:\Chem32\1\Data\GRL-205-20 (Compd-7m) 197.D  
Sample Name: GRL-205-20 (Compd-7m)

```
=====
Acq. Operator   : SYSTEM
Sample Operator : SYSTEM
Acq. Instrument : LC2                      Location : 1
Injection Date  : 8/3/2021 4:26:51 PM
                                           Inj Volume : 5.000 µl
Method          : C:\CHEM32\1\METHODS\HMS_ZORBAXNH2.M
Last changed    : 8/3/2021 3:43:52 PM by SYSTEM
                 (modified after loading)
Sample Info     : 50% MeCN/H2O
                 0.8 mL/min
                 254 nm
                 5 µL inj.
                 1 mg/mL
                 YMCPAK ODS-A
=====
```

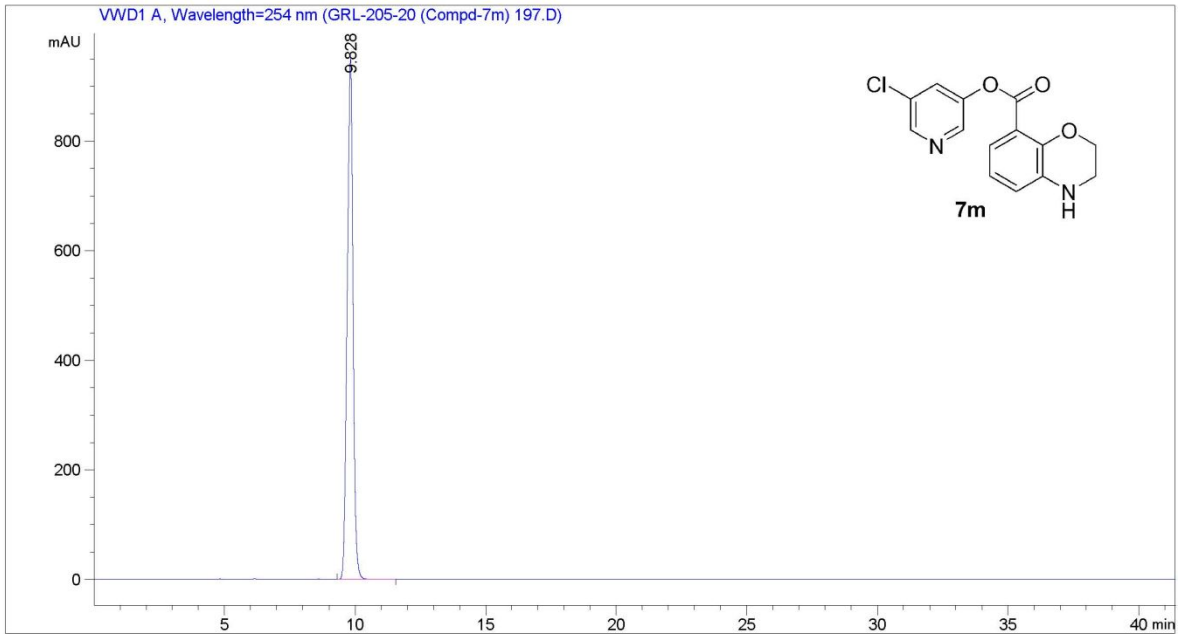

=====  
Fraction Information  
=====

No Fractions found.  
=====

=====  
Area Percent Report  
=====

```
Sorted By      : Signal
Multiplier     : 1.0000
Dilution       : 1.0000
Sample Amount  : 1.00000 [ng/ul] (not used in calc.)
Use Multiplier & Dilution Factor with ISTDs
```

Data File C:\Chem32\1\Data\GRL-205-20 (Compd-7m) 197.D  
Sample Name: GRL-205-20 (Compd-7m)

Signal 1: VWD1 A, Wavelength=254 nm

| Peak # | RetTime [min] | Type | Width [min] | Area [mAU*s] | Height [mAU] | Area %   |
|--------|---------------|------|-------------|--------------|--------------|----------|
| 1      | 9.828         | BB   | 0.2288      | 1.47161e4    | 949.55652    | 100.0000 |

Totals :                    1.47161e4   949.55652

=====  
\*\*\* End of Report \*\*\*

Data File C:\Chem32\1\Data\GRL-211-20 (Compd-9a) 222.D  
Sample Name: GRL-211-20 (Compd-9a)

```
=====
Acq. Operator   : SYSTEM
Sample Operator : SYSTEM
Acq. Instrument : LC2                      Location : 1
Injection Date  : 8/11/2021 11:54:11 AM
                                           Inj Volume : 5.000 µl
Method          : C:\CHEM32\1\METHODS\HMS_ZORBAXNH2.M
Last changed    : 8/10/2021 7:56:13 PM by SYSTEM
                 (modified after loading)
Sample Info     : 50% MeCN/H2O
                 0.8 mL/min
                 254 nm
                 5 uL inj.
                 1 mg/mL
                 YMCPAK ODS-A
=====
```

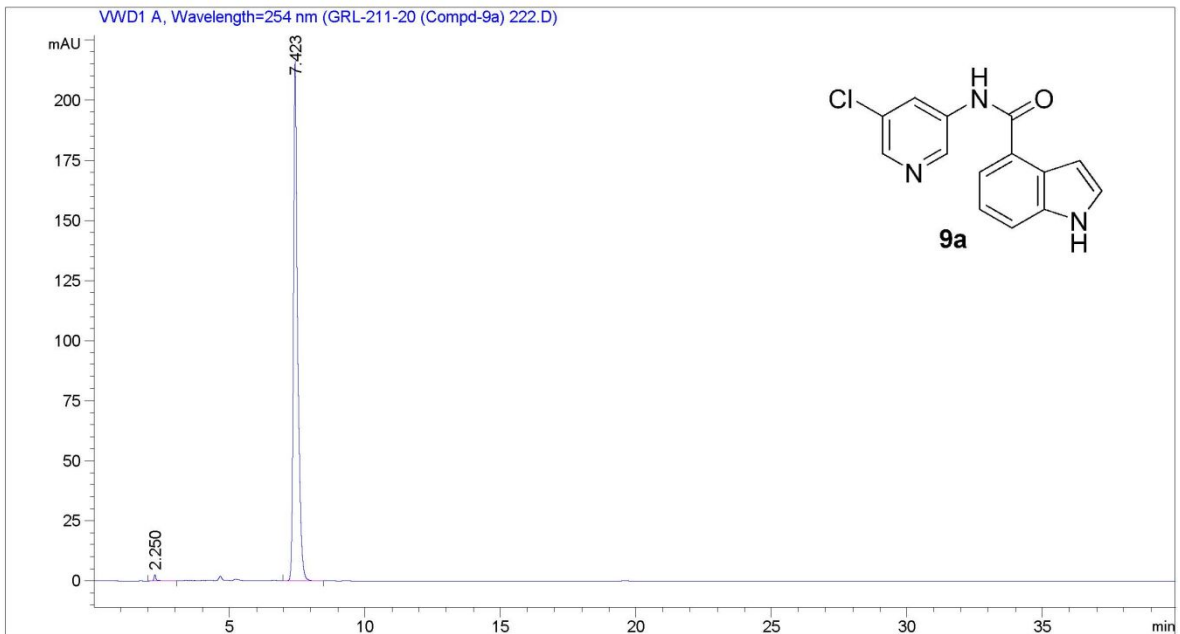

=====  
Fraction Information  
=====

No Fractions found.  
=====

=====  
Area Percent Report  
=====

```
Sorted By      : Signal
Multiplier     : 1.0000
Dilution       : 1.0000
Sample Amount  : 1.00000 [ng/ul] (not used in calc.)
Use Multiplier & Dilution Factor with ISTDs
```

Data File C:\Chem32\1\Data\GRL-211-20 (Compd-9a) 222.D  
Sample Name: GRL-211-20 (Compd-9a)

Signal 1: VWD1 A, Wavelength=254 nm

| Peak # | RetTime [min] | Type | Width [min] | Area [mAU*s] | Height [mAU] | Area %  |
|--------|---------------|------|-------------|--------------|--------------|---------|
| 1      | 2.250         | BV R | 0.0846      | 15.72284     | 2.59787      | 0.6703  |
| 2      | 7.423         | BB   | 0.1537      | 2329.96753   | 216.25853    | 99.3297 |

Totals :                   2345.69037 218.85640

=====  
\*\*\* End of Report \*\*\*

Data File C:\Chem32\1\Data\GRL-171-20 (Compd-9b) 187.D  
Sample Name: GRL-171-20 (Compd-9b)

```
=====
Acq. Operator   : SYSTEM
Sample Operator : SYSTEM
Acq. Instrument : LC2                      Location : 1
Injection Date  : 7/30/2021 8:21:00 PM
                                           Inj Volume : 5.000 µl
Method          : C:\CHEM32\1\METHODS\HMS_ZORBAXNH2.M
Last changed    : 7/30/2021 7:52:04 PM by SYSTEM
                 (modified after loading)
Sample Info     : 50% MeCN/H2O
                 0.8 mL/min
                 254 nm
                 5 µL inj.
                 1 mg/mL
                 YMCPAK ODS-A
=====
```

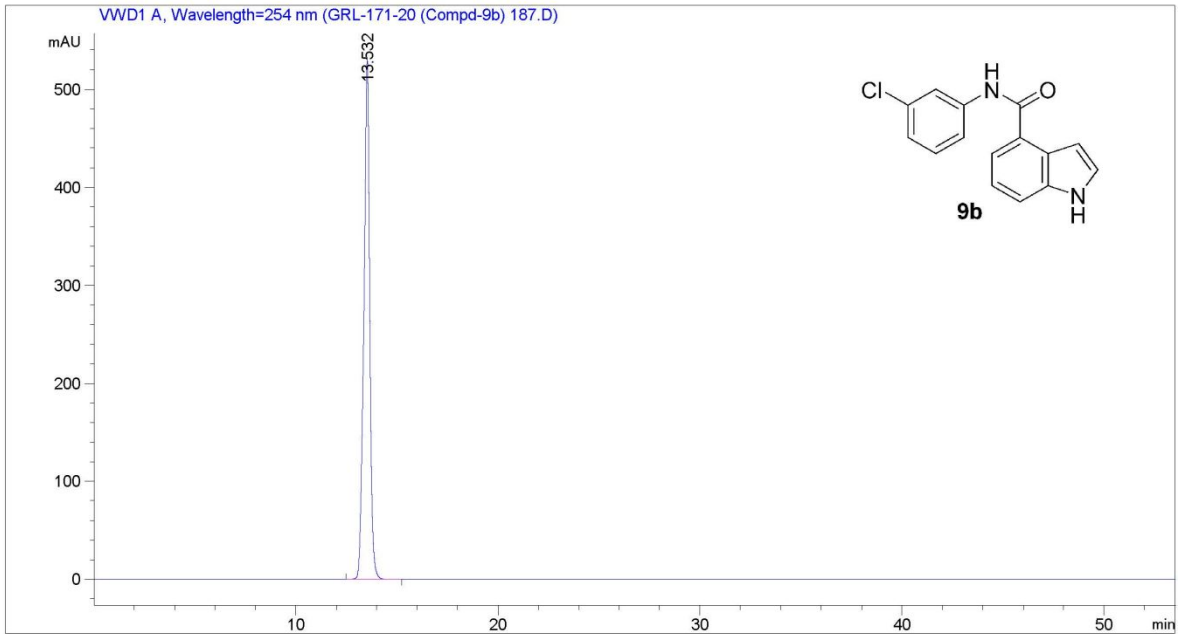

=====  
Fraction Information  
=====

No Fractions found.  
=====

=====  
Area Percent Report  
=====

```
Sorted By      : Signal
Multiplier     : 1.0000
Dilution       : 1.0000
Sample Amount  : 1.00000 [ng/ul] (not used in calc.)
Use Multiplier & Dilution Factor with ISTDs
```

Data File C:\Chem32\1\Data\GRL-171-20 (Compd-9b) 187.D  
Sample Name: GRL-171-20 (Compd-9b)

Signal 1: VWD1 A, Wavelength=254 nm

| Peak # | RetTime [min] | Type | Width [min] | Area [mAU*s] | Height [mAU] | Area %   |
|--------|---------------|------|-------------|--------------|--------------|----------|
| 1      | 13.532        | BB   | 0.2934      | 1.07554e4    | 530.89288    | 100.0000 |

Totals :                   1.07554e4  530.89288

=====  
\*\*\* End of Report \*\*\*



Data File C:\Chem32\1\Data\GRL-83-20 (Compd-9c) 189.D  
Sample Name: GRL-83-20 (Compd-9c)

```
=====
Acq. Operator   : SYSTEM
Sample Operator : SYSTEM
Acq. Instrument : LC2                      Location : 1
Injection Date  : 7/31/2021 6:10:08 PM
                                           Inj Volume : 5.000 µl
Method         : C:\CHEM32\1\METHODS\HMS_ZORBAXNH2.M
Last changed   : 7/31/2021 5:42:56 PM by SYSTEM
                (modified after loading)
Sample Info    : 50% MeCN/H2O
                0.8 mL/min
                254 nm
                5 µL inj.
                1 mg/mL
                YMCPAK ODS-A
=====
```

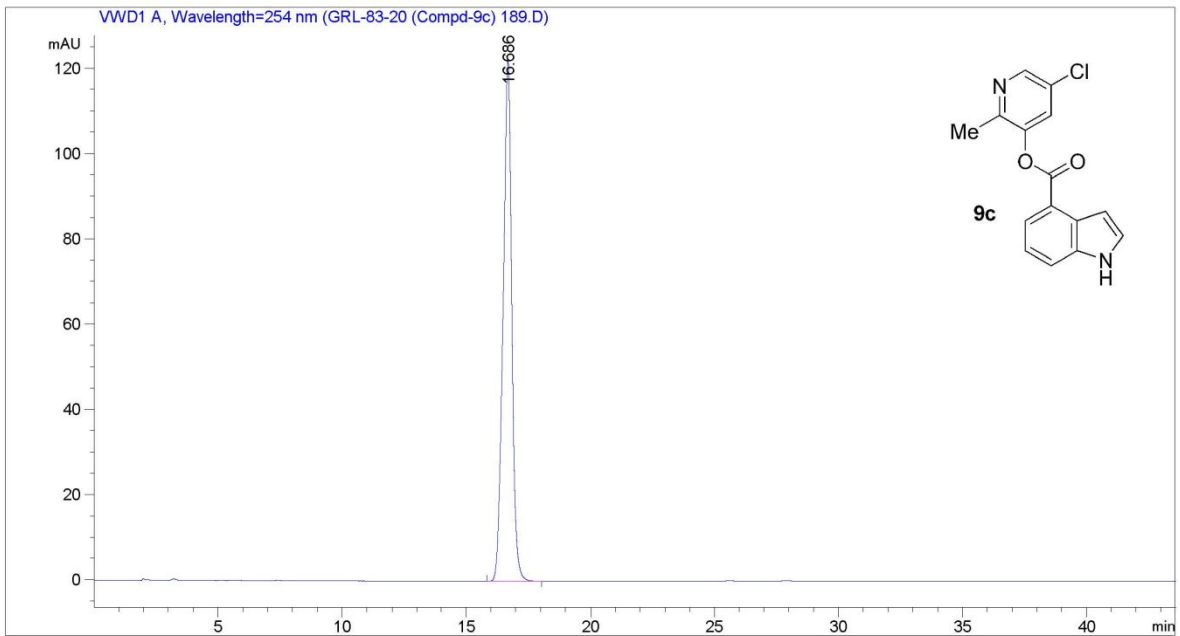

=====  
Fraction Information  
=====

No Fractions found.  
=====

=====  
Area Percent Report  
=====

```
Sorted By      : Signal
Multiplier     : 1.0000
Dilution       : 1.0000
Sample Amount  : 1.00000 [ng/ul] (not used in calc.)
Use Multiplier & Dilution Factor with ISTDs
```

Data File C:\Chem32\1\Data\GRL-83-20 (Compd-9c) 189.D  
Sample Name: GRL-83-20 (Compd-9c)

Signal 1: VWD1 A, Wavelength=254 nm

| Peak # | RetTime [min] | Type | Width [min] | Area [mAU*s] | Height [mAU] | Area %   |
|--------|---------------|------|-------------|--------------|--------------|----------|
| 1      | 16.686        | BB   | 0.3546      | 2963.87207   | 121.94595    | 100.0000 |

Totals :                    2963.87207  121.94595

=====  
\*\*\* End of Report \*\*\*

Data File C:\Chem32\1\Data\GRL-91-20 (Compd-9d) 193.D  
Sample Name: GRL-91-20 (Compd-9d)

```
=====
Acq. Operator   : SYSTEM
Sample Operator : SYSTEM
Acq. Instrument : LC2                      Location : 1
Injection Date  : 8/2/2021 6:47:14 PM
                                           Inj Volume : 5.000 µl
Method          : C:\CHEM32\1\METHODS\HMS_ZORBAXNH2.M
Last changed    : 8/2/2021 3:00:57 PM by SYSTEM
                 (modified after loading)
Sample Info     : 50% MeCN/H2O
                 0.8 mL/min
                 254 nm
                 5 uL inj.
                 1 mg/mL
                 YMCPAK ODS-A
=====
```

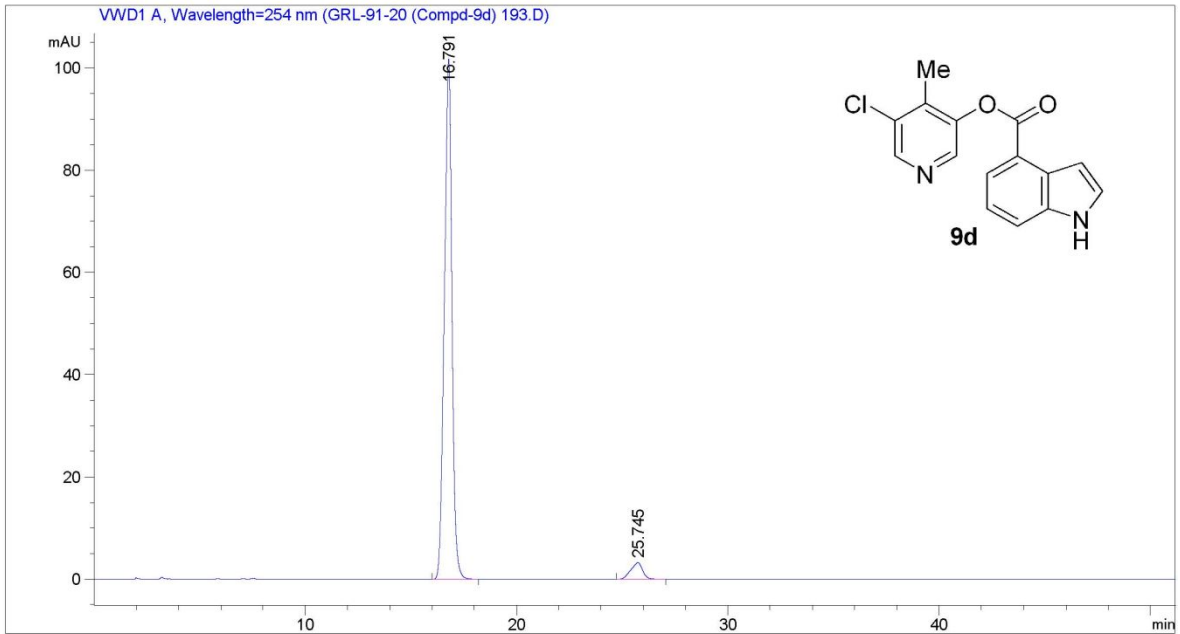

=====  
Fraction Information  
=====

No Fractions found.  
=====

=====  
Area Percent Report  
=====

```
Sorted By      : Signal
Multiplier     : 1.0000
Dilution       : 1.0000
Sample Amount  : 1.00000 [ng/ul] (not used in calc.)
Use Multiplier & Dilution Factor with ISTDs
```

Data File C:\Chem32\1\Data\GRL-91-20 (Compd-9d) 193.D  
Sample Name: GRL-91-20 (Compd-9d)

Signal 1: VWD1 A, Wavelength=254 nm

| Peak # | RetTime [min] | Type | Width [min] | Area [mAU*s] | Height [mAU] | Area %  |
|--------|---------------|------|-------------|--------------|--------------|---------|
| 1      | 16.791        | BB   | 0.3658      | 2543.07446   | 101.68309    | 95.2569 |
| 2      | 25.745        | BB   | 0.5571      | 126.62586    | 3.24617      | 4.7431  |

Totals :                    2669.70033  104.92926

=====  
\*\*\* End of Report \*\*\*

Data File C:\Chem32\1\Data\GRL-102-20 (Compd-9e) 186.D  
Sample Name: GRL-102-20 (Compd-9e)

=====  
Acq. Operator : SYSTEM  
Sample Operator : SYSTEM  
Acq. Instrument : LC2 Location : 1  
Injection Date : 7/30/2021 6:08:56 PM Inj Volume : 5.000 µl  
Method : C:\CHEM32\1\METHODS\HMS\_ZORBAXNH2.M  
Last changed : 7/30/2021 5:36:01 PM by SYSTEM  
(modified after loading)  
Sample Info : 50% MeCN/H2O  
0.8 mL/min  
254 nm  
5 µL inj.  
1 mg/mL  
YMCPAK ODS-A

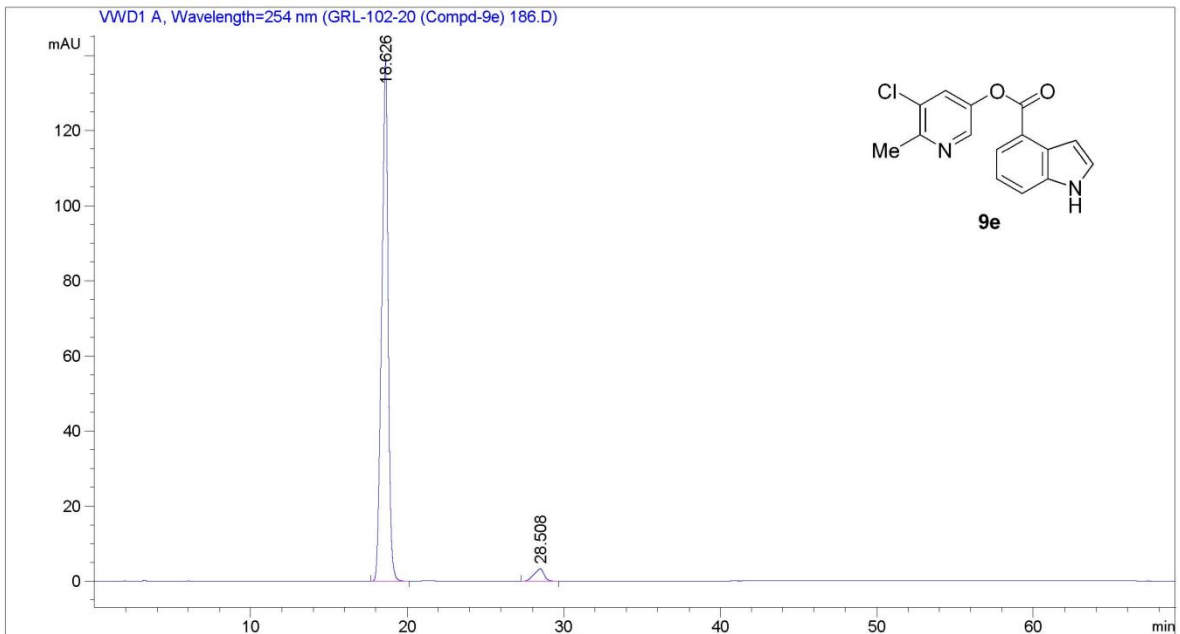

=====  
Fraction Information  
=====

No Fractions found.  
=====

=====  
Area Percent Report  
=====

Sorted By : Signal  
Multiplier : 1.0000  
Dilution : 1.0000  
Sample Amount: : 1.00000 [ng/ul] (not used in calc.)  
Use Multiplier & Dilution Factor with ISTDs

Data File C:\Chem32\1\Data\GRL-102-20 (Compd-9e) 186.D  
Sample Name: GRL-102-20 (Compd-9e)

Signal 1: VWD1 A, Wavelength=254 nm

| Peak # | RetTime [min] | Type | Width [min] | Area [mAU*s] | Height [mAU] | Area %  |
|--------|---------------|------|-------------|--------------|--------------|---------|
| 1      | 18.626        | BB   | 0.4097      | 3947.97852   | 138.42316    | 96.3732 |
| 2      | 28.508        | BB   | 0.6239      | 148.57428    | 3.35968      | 3.6268  |

Totals :                   4096.55280 141.78283

=====  
\*\*\* End of Report \*\*\*

Data File C:\Chem32\1\Data\GRL-188-20 (Compd-9f) 212.D  
Sample Name: GRL-188-20 (Compd-9f)

```
=====
Acq. Operator   : SYSTEM
Sample Operator : SYSTEM
Acq. Instrument : LC2                      Location : 1
Injection Date  : 8/6/2021 3:28:56 PM
                                           Inj Volume : 5.000 µl
Method          : C:\CHEM32\1\METHODS\HMS_ZORBAXNH2.M
Last changed    : 8/6/2021 2:41:32 PM by SYSTEM
                 (modified after loading)
Sample Info     : 50% MeCN/H2O
                 0.8 mL/min
                 254 nm
                 5 µL inj.
                 1 mg/mL
                 YMCPAK ODS-A
=====
```

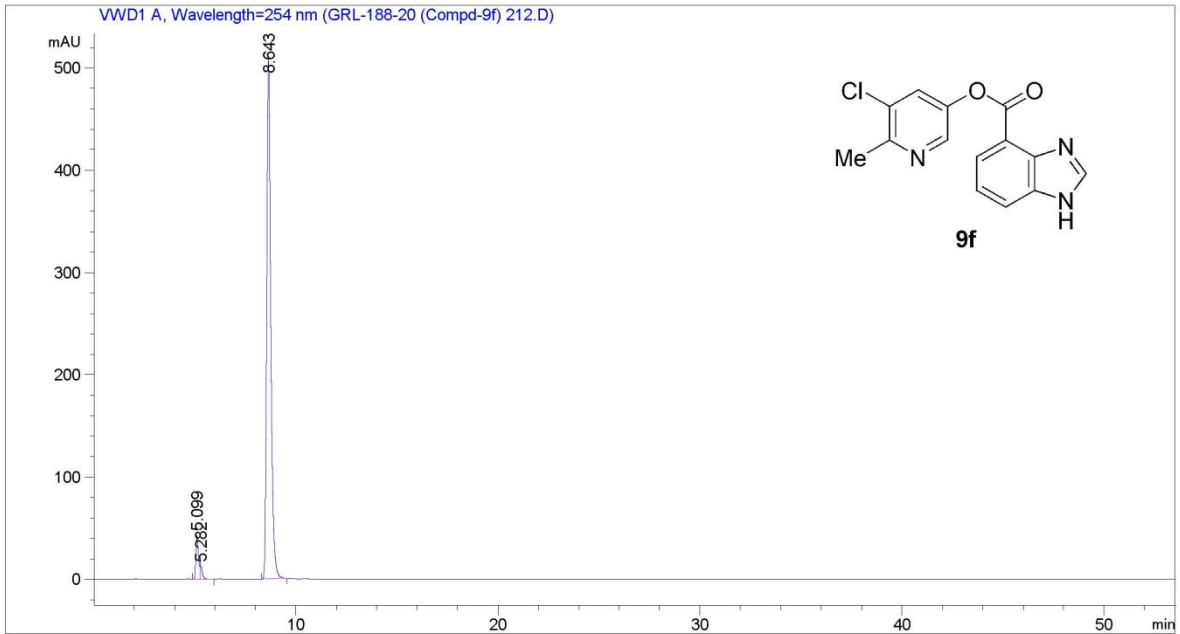

=====  
Fraction Information  
=====

No Fractions found.  
=====

=====  
Area Percent Report  
=====

```
Sorted By      : Signal
Multiplier     : 1.0000
Dilution       : 1.0000
Sample Amount  : 1.00000 [ng/ul] (not used in calc.)
Use Multiplier & Dilution Factor with ISTDs
```

Data File C:\Chem32\1\Data\GRL-188-20 (Compd-9f) 212.D  
Sample Name: GRL-188-20 (Compd-9f)

Signal 1: VWD1 A, Wavelength=254 nm

| Peak # | RetTime [min] | Type | Width [min] | Area [mAU*s] | Height [mAU] | Area %  |
|--------|---------------|------|-------------|--------------|--------------|---------|
| 1      | 5.099         | BV   | 0.1345      | 385.71869    | 42.66505     | 5.0942  |
| 2      | 5.282         | VB   | 0.1137      | 97.85328     | 12.73054     | 1.2923  |
| 3      | 8.643         | BB   | 0.2087      | 7088.20361   | 508.35724    | 93.6135 |

Totals :                    7571.77558  563.75283

=====  
\*\*\* End of Report \*\*\*
